# Supplementary material for: Single-nucleotide variant calling in single-cell sequencing data with Monopogen
Source: PubMed Central journal article supplement (PMC11098741; doi:10.1038/s41587-023-01873-x), 2023-08-17
Supplement: 41587_2023_1873_MOESM1_ESM.pdf [file 41587_2023_1873_MOESM1_ESM.pdf]

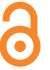

---

# Single-nucleotide variant calling in single-cell sequencing data with Monopogen

---

In the format provided by the authors and unedited

# Supplementary Figures

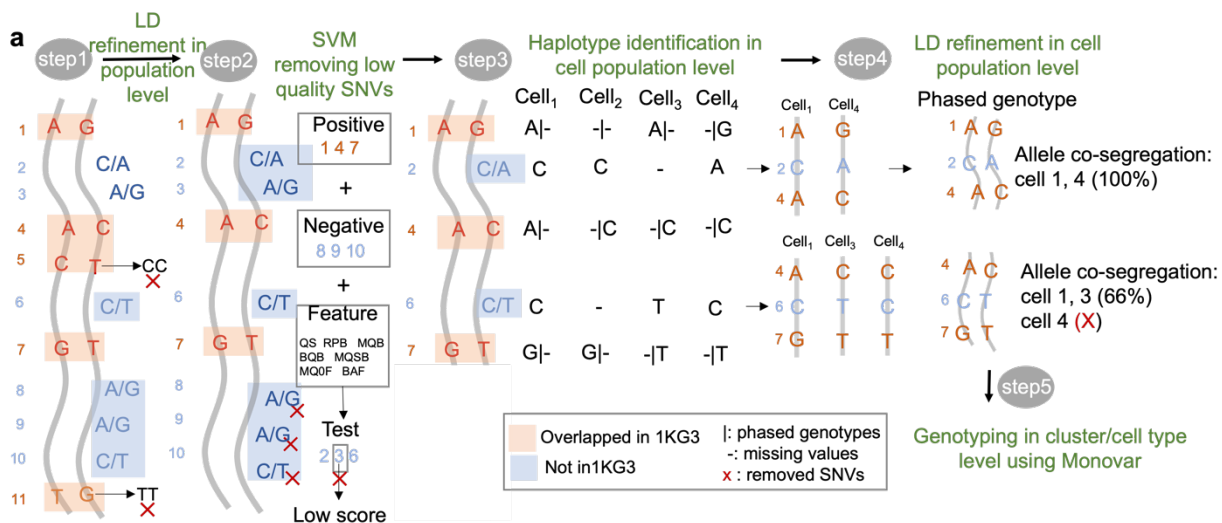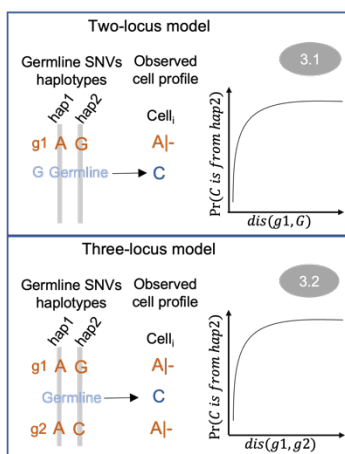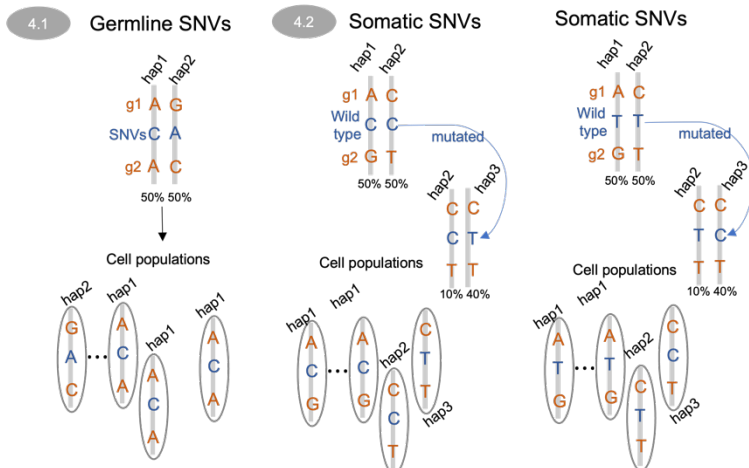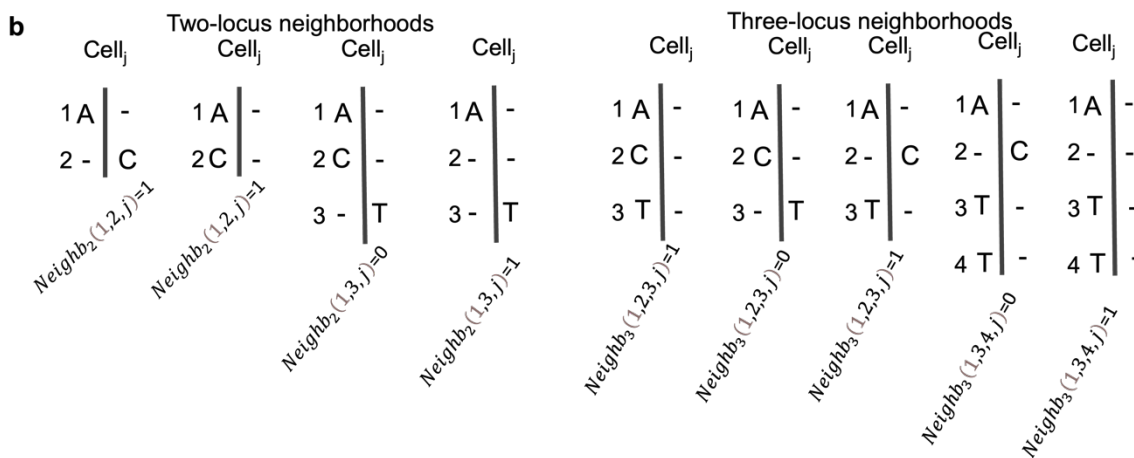

**Fig.S1 Putative somatic SNV detection in cell population level. a,** Workflow of putative somatic SNV detection. **Step1:** SNVs are classified into two categories based on whether they are overlapped with 1KG3 or not. SNVs 1, 4, 5, 7, 11 with orange color (phased genotype available) are germline and SNVs 2, 3, 6, 8, 9, 10 with blue color are *de novo* SNVs. Although there are SNVs observed in position 5 and 11 from single cell sequencing data, their genotypes are identified as homozygous after LD refinement using population data. Thus, SNVs 5 and 11 are removed. **Step2:** The remaining germline SNVs 1, 4, 7 are selected as the positive labels. There is a *de novo* SNVs chunk (e.g., 8, 9, 10) and no germline SNVs inside. SNVs 8,9,10 are set as negative labels. The remaining SNVs 2,3,6 are set as test set. Seven variant calling metrics provided by *Bcftools*, including quality score for calling (QS), variant distance bias for filtering splice-site artefacts (VDB), Mann-Whitney U test of read position bias (RPB), Mann-Whitney U test of base quality bias (BQB), Mann-Whitney U test of ratio of mapping quality and strand bias (MQSB), segregation-based metric (SGB) and B-allele frequency (BAF), are set as the features. The SNVs with prediction probability of positive label lower than 0.5 are removed (i.e., position 3). **Step3:** To phase SNVs 2, 6 that are not detected in 1KG3, we first search their germline neighborhoods (**see Methods**). The neighborhood searching process also be implemented on germline SNVs to estimate the empirical relationship between LD refinement score and haplotype length (as shown in **3.1** and **3.2**). For SNV 2, haplotype A-C-A in cell 1 and G-A-C in cell 4 are detected. For SNV 6, haplotype A-C-G in cell 1, C-T-T in cell 3 and C-C-T in cell 4 are detected. **Step4:** LD refinement at cell population level. The phased genotype for SNV 2 is C|A which all alleles show co-segregation at cell population level. The phased

genotype for SNV 6 is C|T which only alleles in cell 1 and 3 show co-segregations. This pattern can be used to distinguish putative somatic SNVs from germline SNVs. For germline SNVs, there are only two haplotypes available in the cell population since all cells share identical genotypes and only one haplotype is randomly selected due to the drop-out issue (4.1). For somatic SNVs, a proportion of wildtype allele is mutated (for example hap2 changes to hap3), thus resulting in 3 haplotypes available in the cell population. Due to allele C in hap1 (A-C-G) and hap 2 (C-C-T) in 4.2, the LD refinement score is 0.33. **b**, Examples of two-locus neighborhoods and three-locus neighborhoods used for LD refinement models.

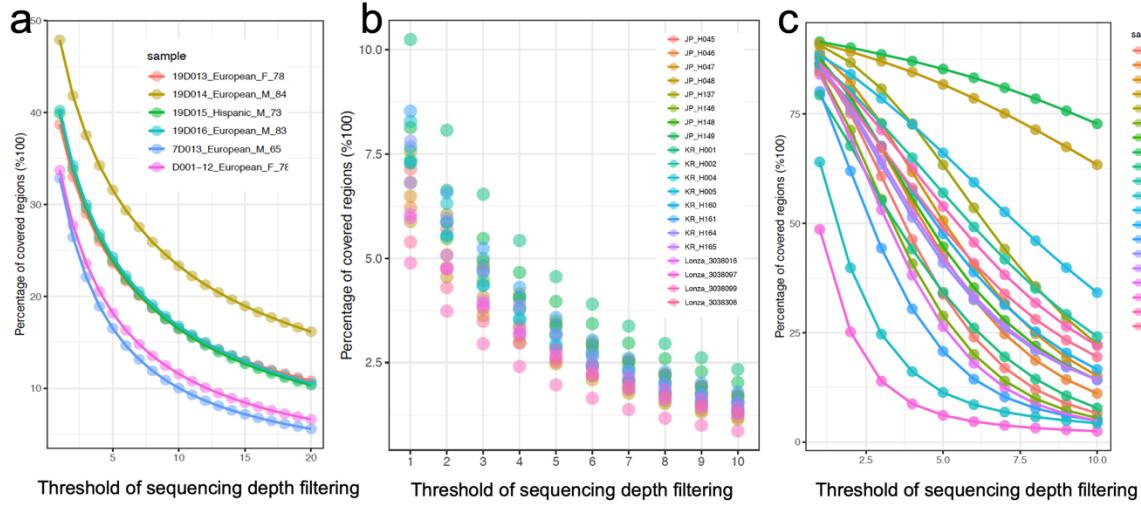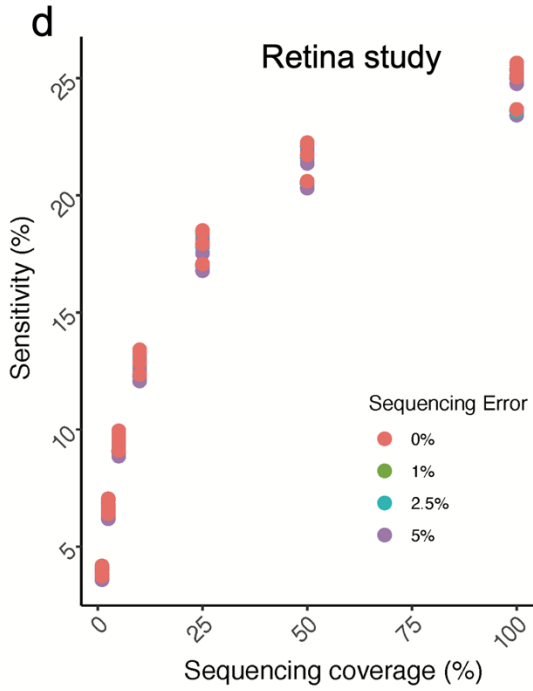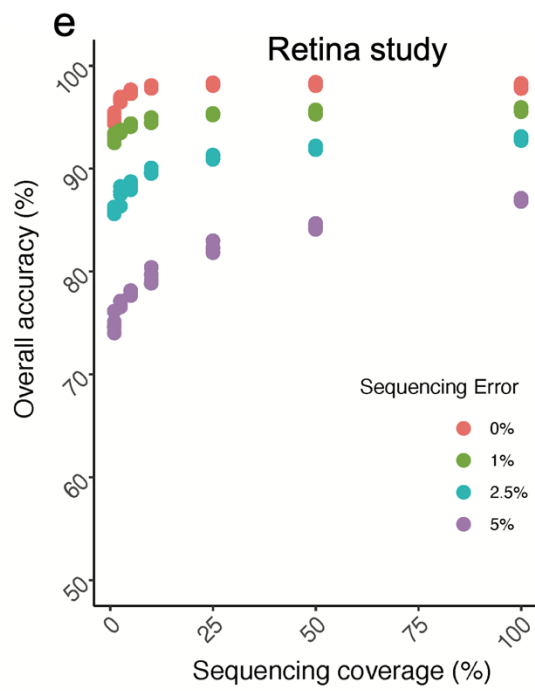

**Fig.S2 Effects of sequencing coverage and sequencing error on SNV detection. a-**

**c:** Sequencing depth survey on single cell sequencing datasets. **a**, Human retina snRNA-seq data (6 samples). **b**, AIDA scRNA-seq data (20 samples), **c**. heart left ventricle snATAC-seq data (randomly select 20 samples from 65 donors), respectively. Each curve denotes results for one sample. The X-axis denotes the sequencing coverage threshold and Y-axis denotes the percentage of genome region covered by more than the specified depth threshold. **d-e:** Effects of sequencing coverage and sequencing error rate on Monopogen performance in retina snRNA-seq data. To mimic different sequencing coverage, we randomly select a fraction of reads from the whole bam file, followed by SNV calling using Monopogen. To mimic various levels of sequencing error, the artifacts are introduced into original sequencing reads with level 0%~5%. For example, 5% denotes that 5 mismatches are introduced in the sequence of 100 base pairs.

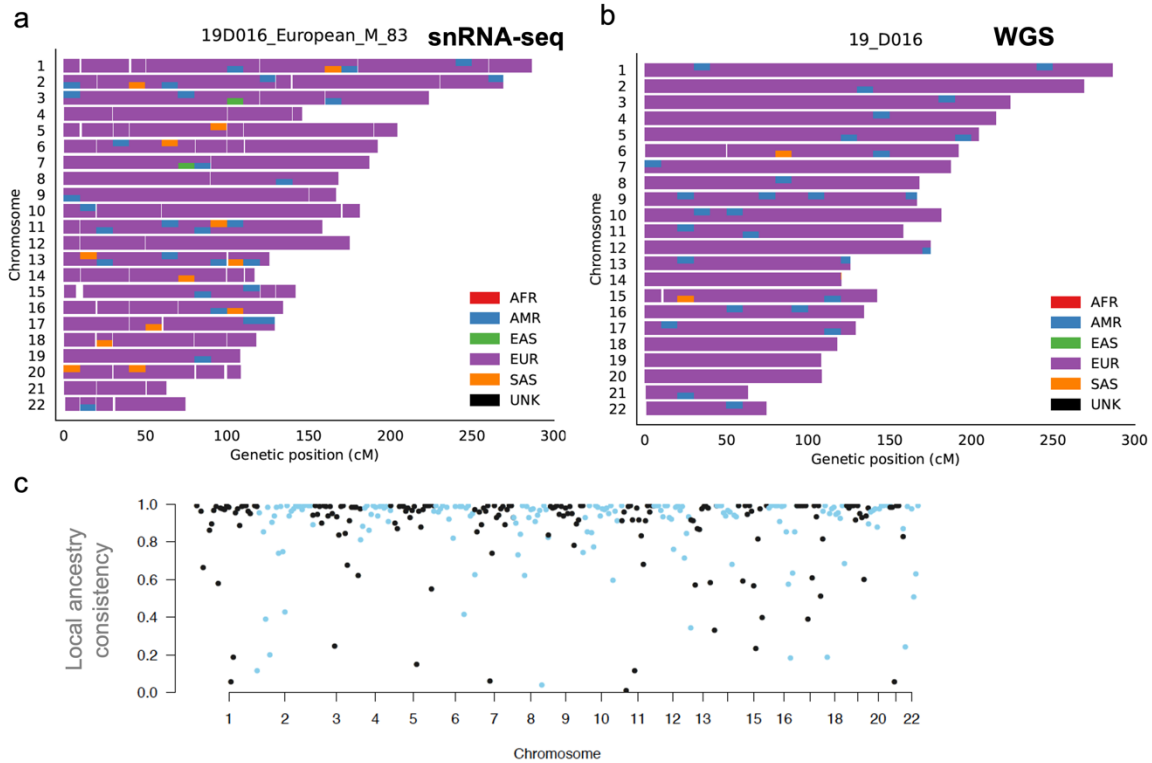

**Fig S3. Local ancestry inference on 19D016 from the retina study. a-b.** Local ancestry inference of a European sample 19D016 using genotypes from the snRNA-seq (a) and the WGS (b) data, respectively. The phased genotypes from 1KG3 are used as the reference for local ancestry inference. Colors in each chromosome denote the inferred source ancestry with a bin size of 1cM.

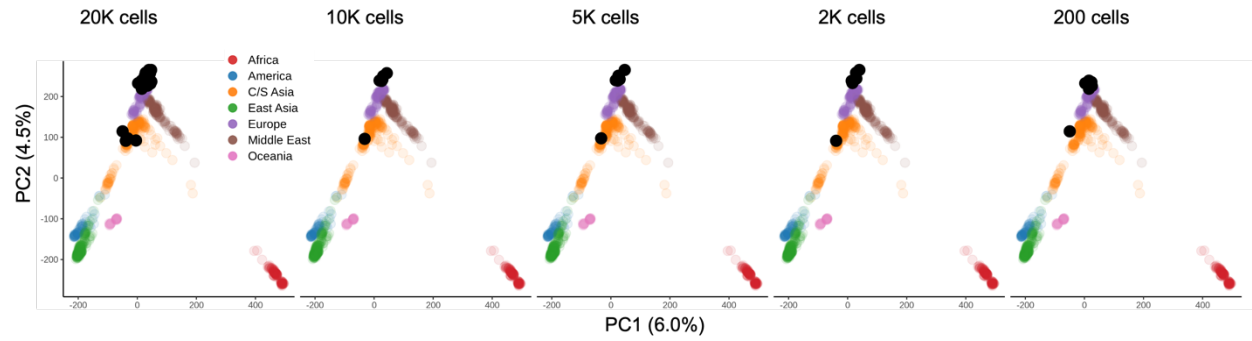

**Fig. S4 Genetic ancestry of the 4 retina samples using Monopogen genotypes derived from downsampled snRNA-seq data.** The down-sampling scheme is the same as the ones in **Fig. 2e-f**. Colored dots are the 938 reference individuals in the HGDP and black dots the retina samples. The explained variance of PC1 and PC2 are shown.



**a**

| SampleID    | No. of SNVs in snRNA | No. of SNVs in snATAC | No. of SNVs overlapped | 01->01 | 01->11 | 11->11 | 11->01 | Genotyping concordance |
|-------------|----------------------|-----------------------|------------------------|--------|--------|--------|--------|------------------------|
| ENCDO038QFX | 61767                | 219873                | 55505                  | 28181  | 770    | 26281  | 269    | 0.981                  |
| ENCDO061UFT | 65782                | 188923                | 51342                  | 23556  | 518    | 27076  | 185    | 0.986                  |
| ENCDO068KYD | 75279                | 143851                | 47721                  | 23073  | 610    | 23825  | 211    | 0.983                  |
| ENCDO098ZMW | 53898                | 159297                | 37638                  | 17845  | 499    | 19172  | 116    | 0.984                  |
| ENCDO107KXS | 81400                | 171295                | 52049                  | 28854  | 546    | 22411  | 232    | 0.985                  |
| ENCDO110LFV | 63921                | 152404                | 42933                  | 19445  | 562    | 22742  | 179    | 0.983                  |
| ENCDO123GXG | 61846                | 143544                | 43350                  | 19680  | 706    | 22790  | 166    | 0.980                  |
| ENCDO166SII | 61297                | 143913                | 40553                  | 18786  | 569    | 21015  | 178    | 0.982                  |
| ENCDO182VFD | 79736                | 206834                | 67813                  | 33554  | 698    | 33288  | 269    | 0.986                  |
| ENCDO184BIH | 64175                | 215130                | 58364                  | 26705  | 745    | 30554  | 357    | 0.981                  |
| ENCDO187SDN | 76811                | 205017                | 62442                  | 28829  | 1247   | 32074  | 286    | 0.975                  |
| ENCDO189VVY | 58598                | 173068                | 43040                  | 20049  | 733    | 22082  | 171    | 0.979                  |
| ENCDO208BPU | 58850                | 156928                | 40801                  | 19057  | 511    | 21070  | 157    | 0.984                  |
| ENCDO212WIV | 58884                | 224015                | 53345                  | 25027  | 834    | 27264  | 215    | 0.980                  |
| ENCDO216BMM | 65770                | 211712                | 55190                  | 27463  | 883    | 26640  | 202    | 0.980                  |
| ENCDO229CTV | 89106                | 219897                | 79217                  | 39773  | 1191   | 37914  | 337    | 0.981                  |
| ENCDO239INK | 67631                | 142027                | 42016                  | 18652  | 527    | 22650  | 184    | 0.983                  |
| ENCDO240MDH | 57946                | 81850                 | 22469                  | 9502   | 295    | 12506  | 163    | 0.980                  |
| ENCDO266KDE | 88269                | 176674                | 68663                  | 33153  | 720    | 34522  | 262    | 0.986                  |
| ENCDO269PFV | 98215                | 227957                | 83730                  | 45012  | 1510   | 36922  | 279    | 0.979                  |
| ENCDO308XYT | 64473                | 246119                | 61736                  | 29395  | 1063   | 31023  | 254    | 0.979                  |
| ENCDO411EVD | 68500                | 211140                | 58562                  | 29072  | 900    | 28378  | 203    | 0.981                  |
| ENCDO423HZU | 82065                | 142341                | 52663                  | 22561  | 656    | 29145  | 298    | 0.982                  |
| ENCDO435KUZ | 74700                | 182876                | 59834                  | 30125  | 697    | 28821  | 188    | 0.985                  |
| ENCDO446FXE | 59777                | 171857                | 43413                  | 20427  | 510    | 22299  | 173    | 0.984                  |
| ENCDO522PCG | 63072                | 234226                | 58236                  | 29284  | 766    | 27915  | 267    | 0.982                  |
| ENCDO528BHB | 73137                | 208972                | 62160                  | 31406  | 669    | 29849  | 226    | 0.986                  |
| ENCDO529CYH | 61550                | 217791                | 53501                  | 27150  | 737    | 25413  | 199    | 0.983                  |
| ENCDO545EJY | 73119                | 203658                | 60786                  | 21649  | 1988   | 36818  | 329    | 0.962                  |
| ENCDO575WHY | 71832                | 226543                | 64474                  | 32779  | 891    | 30583  | 215    | 0.983                  |
| ENCDO580GZH | 95601                | 283112                | 89719                  | 54356  | 1233   | 33810  | 314    | 0.983                  |
| ENCDO593PZY | 94765                | 280204                | 87675                  | 49971  | 1256   | 36044  | 399    | 0.981                  |
| ENCDO602PYC | 70400                | 239096                | 66512                  | 34436  | 1357   | 30442  | 270    | 0.976                  |
| ENCDO607DMC | 60832                | 221842                | 55081                  | 27385  | 617    | 26829  | 248    | 0.984                  |
| ENCDO639HZG | 62752                | 221886                | 48676                  | 26793  | 850    | 20860  | 169    | 0.979                  |
| ENCDO650FUH | 78673                | 133331                | 48222                  | 22188  | 499    | 25315  | 217    | 0.985                  |
| ENCDO695LFW | 63466                | 193774                | 49882                  | 24198  | 633    | 24825  | 218    | 0.983                  |
| ENCDO737TEG | 79273                | 226480                | 71745                  | 34846  | 1179   | 35437  | 280    | 0.980                  |
| ENCDO738SLM | 49788                | 223247                | 44601                  | 21633  | 640    | 22098  | 228    | 0.981                  |
| ENCDO751PQQ | 85848                | 228343                | 76987                  | 39273  | 1104   | 36265  | 341    | 0.981                  |
| ENCDO768WUT | 62716                | 138199                | 37372                  | 15588  | 616    | 21000  | 164    | 0.979                  |
| ENCDO817MDD | 64853                | 136165                | 39552                  | 19334  | 449    | 19594  | 168    | 0.984                  |
| ENCDO856ZQJ | 74844                | 201224                | 62935                  | 30583  | 873    | 31257  | 221    | 0.983                  |
| ENCDO862XAV | 65561                | 217839                | 57316                  | 28231  | 713    | 28161  | 203    | 0.984                  |
| ENCDO865TFF | 72092                | 298313                | 69609                  | 41300  | 883    | 27080  | 338    | 0.982                  |
| ENCDO874YVU | 57725                | 205183                | 47113                  | 21996  | 766    | 24166  | 181    | 0.980                  |
| ENCDO894OKI | 73062                | 143848                | 45911                  | 21565  | 756    | 23431  | 154    | 0.980                  |
| ENCDO934DRK | 82939                | 152098                | 54277                  | 25285  | 793    | 27947  | 246    | 0.981                  |
| ENCDO971VRE | 76757                | 197174                | 64795                  | 32331  | 1149   | 31047  | 263    | 0.978                  |

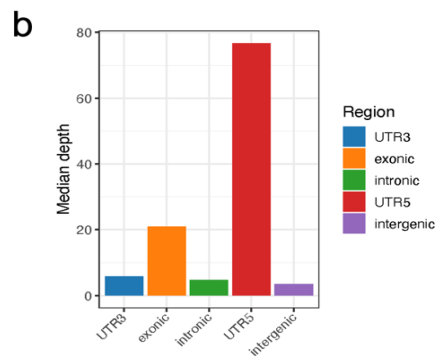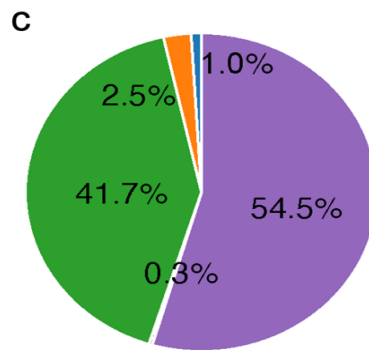

**Fig. S5 Genotyping concordance between the snRNA-seq and the snATAC-seq data from the same sample. a**, Genotype concordance between scRNA-seq and scATAC-seq on 54 heart left ventricle donors in the ENCODE project. Each sample has paired snRNA-seq and snATAC-seq measured. **b-c**, Distribution of germline variants

from Monopogen with median depth (**b**) and the percentage of variants (**c**) in each gene annotation category.

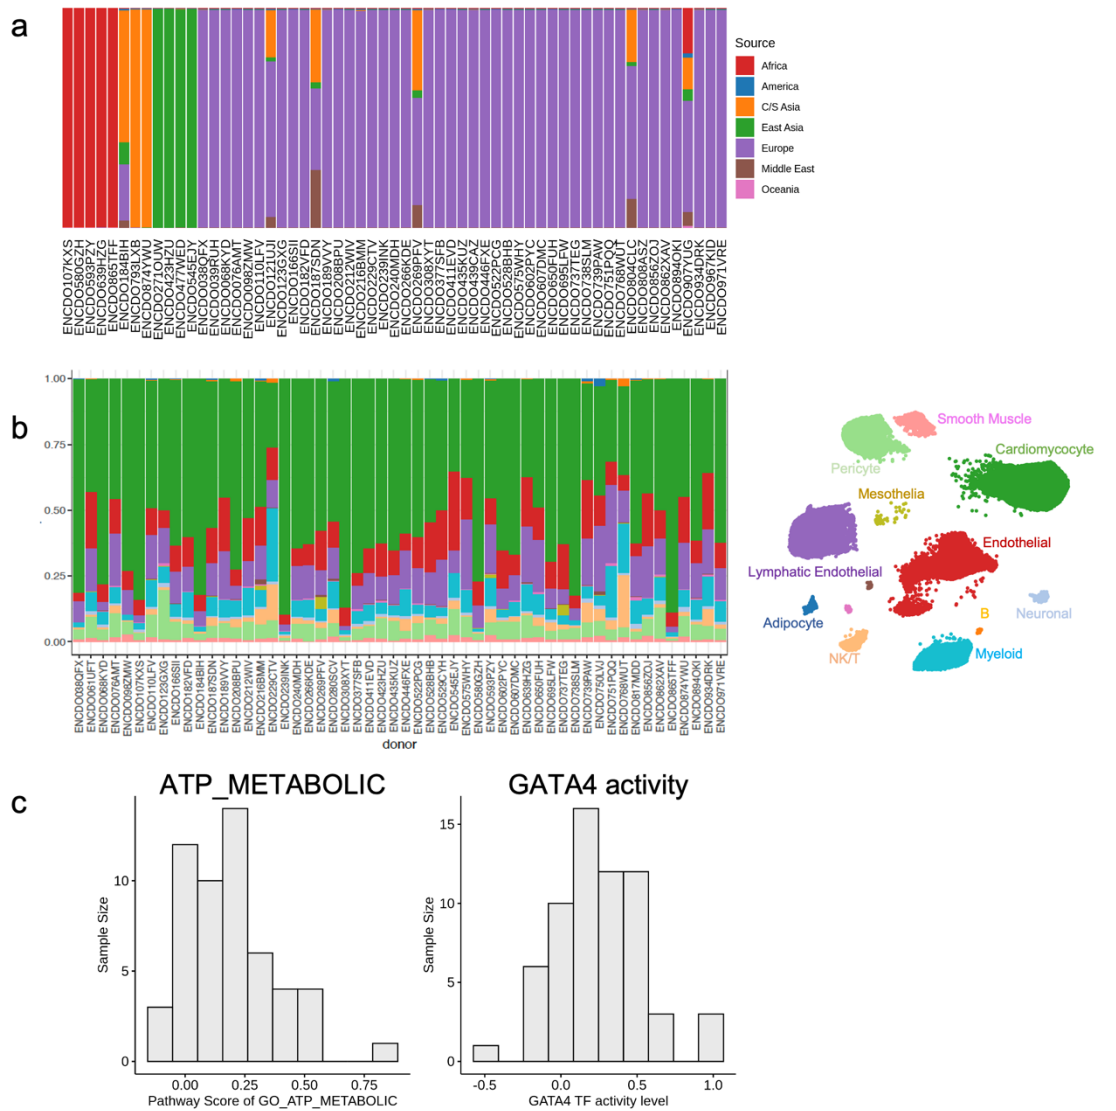

**Fig.S6 Sample information on 65 heart left ventricle donors in the ENCODE project.** **a**, Inferred cell type composition by mapping cells to Azimuth heart database. **b**, Inferred ancestry components based on genotypes from Monopogen using ADMIXTURE. **c**, Histogram distribution of calculated pathway score GO\_ATP\_METABOLIC. **d**, Histogram distribution of calculated GATA4 TF activity level from chromatin accessibility level.

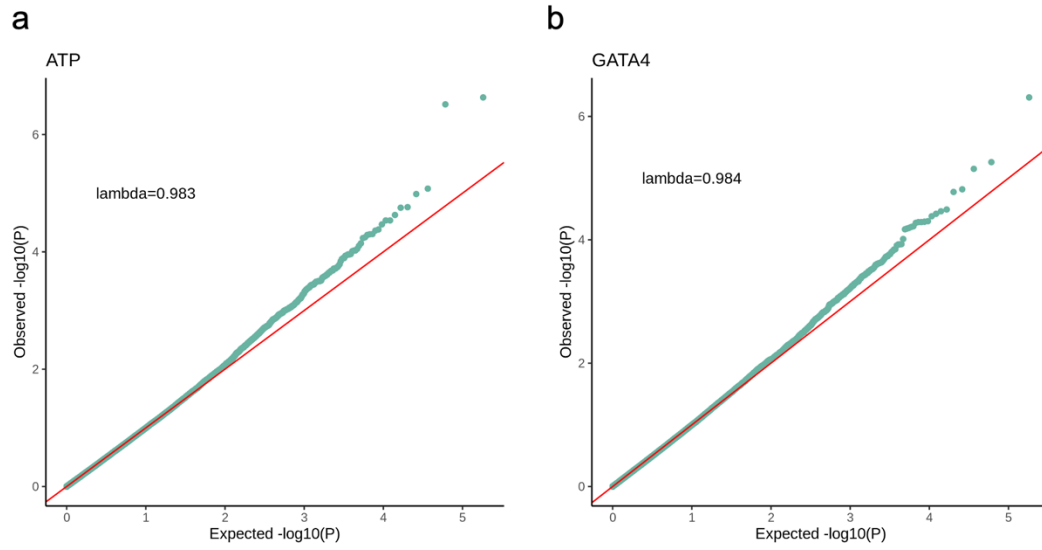

**Fig.S7 Quantile-Quantile plot for the association study of GO\_ATP\_METABOLIC (a) and GATA4 TF activity level (b).** The inflation factor value is labeled on left top corner.

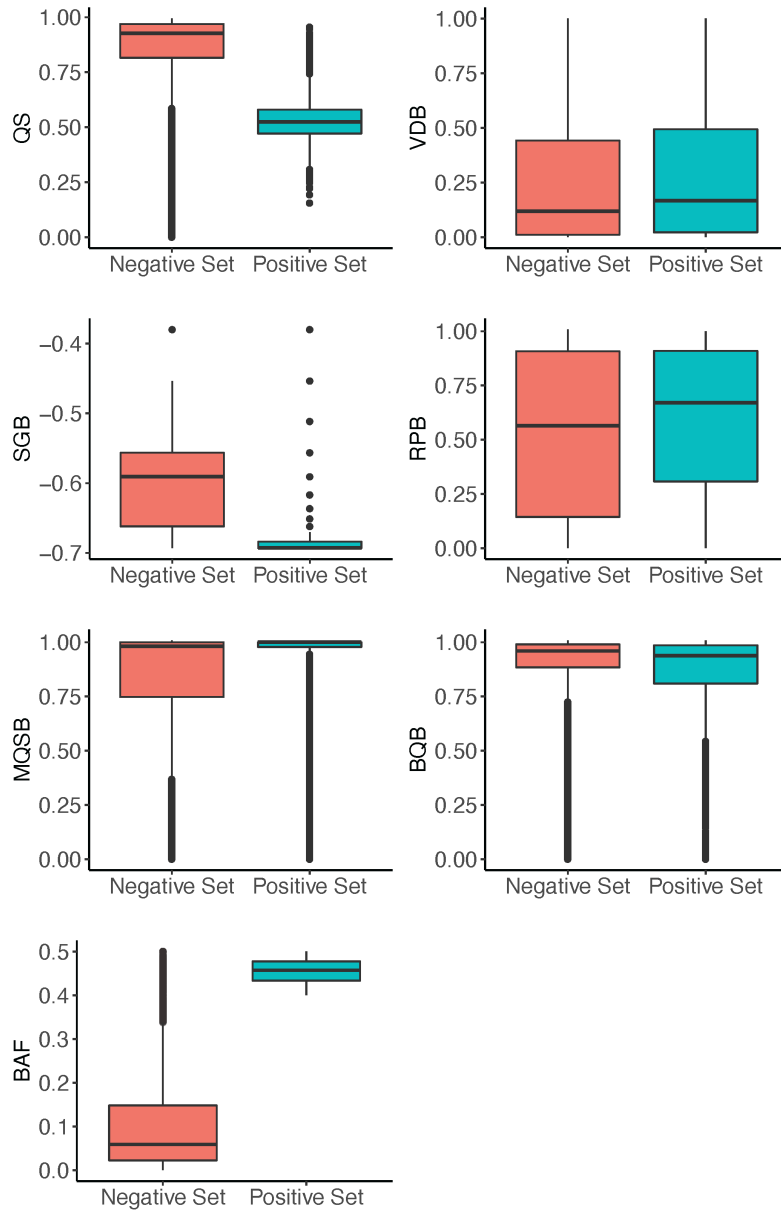

**Fig. S8 Feature distribution on positive and negative labels used in the SVM**

**module for single-cell DNA data (N=1,019,134).** For each box, the centerline defines the median, the height of the box is given by the interquartile range (IQR), the whiskers are given by  $1.5 \times \text{IQR}$  and outliers are given as points beyond the minimum or maximum whisker.

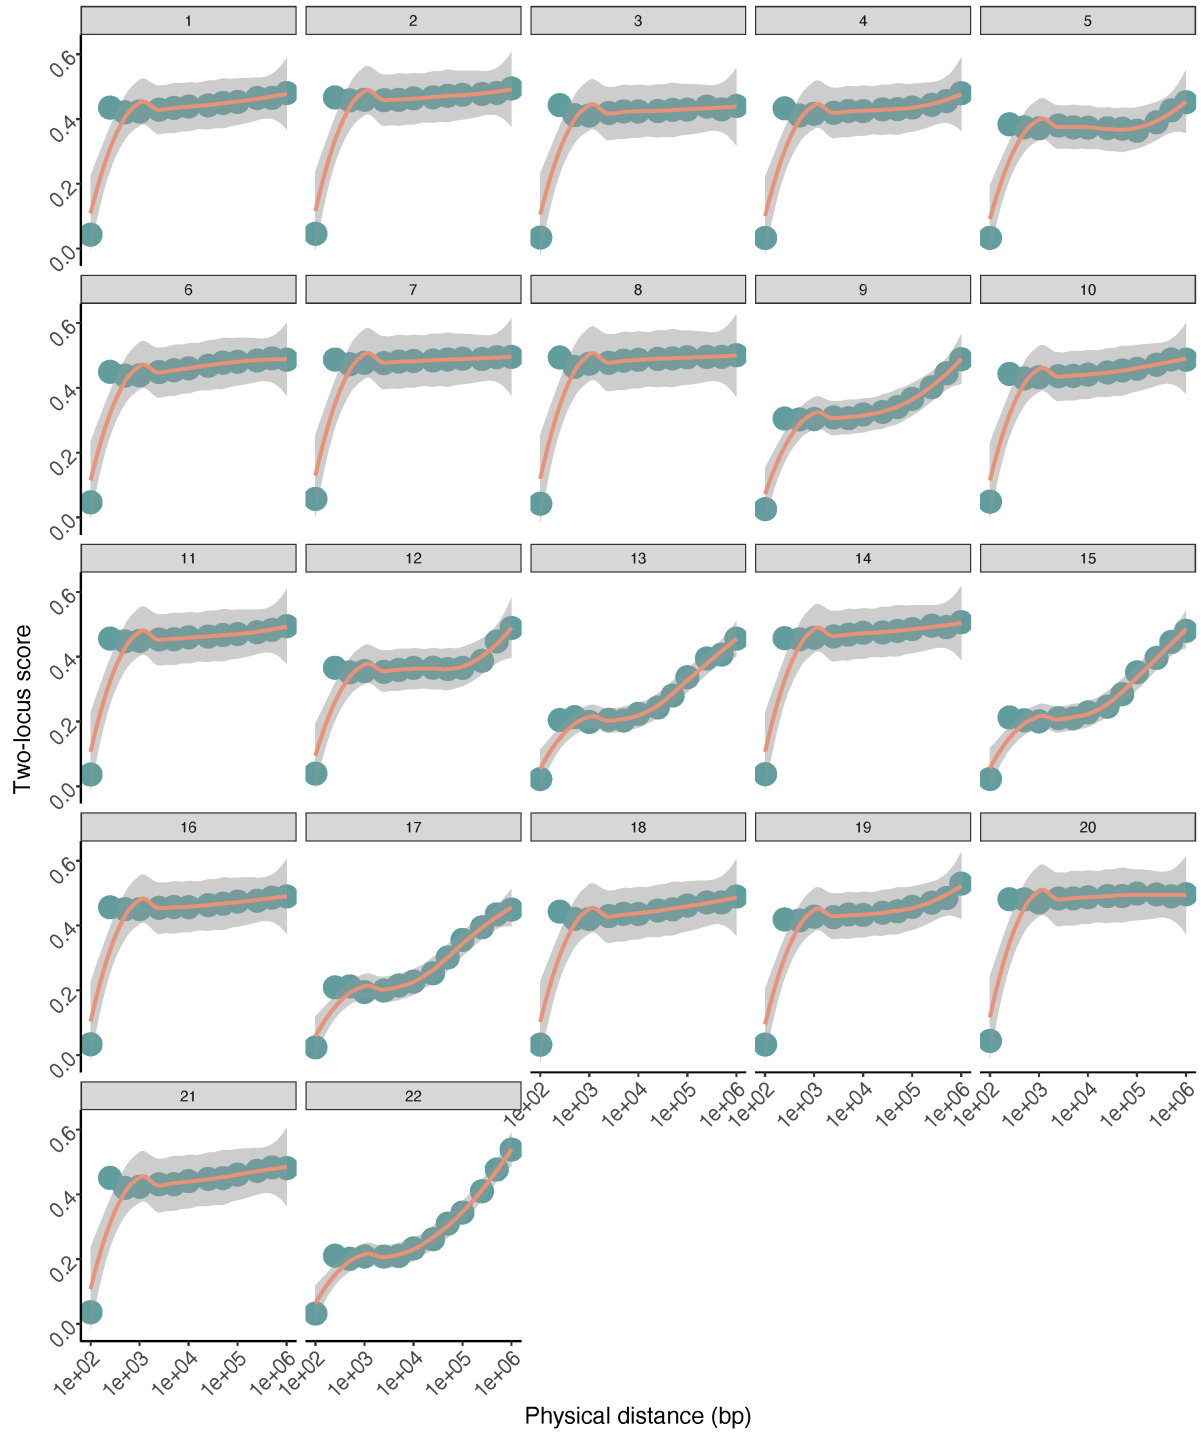

**Fig S9: Two-locus LD refinement score on germline SNVs from the TNBC sample measured in single-cell DNA. Haplotypes are grouped based on their distance into 13**

bins with <100bp, (100bp, 250bp), (250bp, 500bp), (500bp, 1kb), (1kb, 2.5kb), (2.5kb, 5kb), (5kb, 10kb), (10kb, 25kb), (25kb, 50kb), (50kb, 100kb), (100kb, 250kb), (250kb, 500kb) and >500kb. The X-axis is in logarithmic scale. Y-axis shows the mean value of score for all pairs within each bin together with the 95% confidence interval. Each panel shows the result from one chromosome.

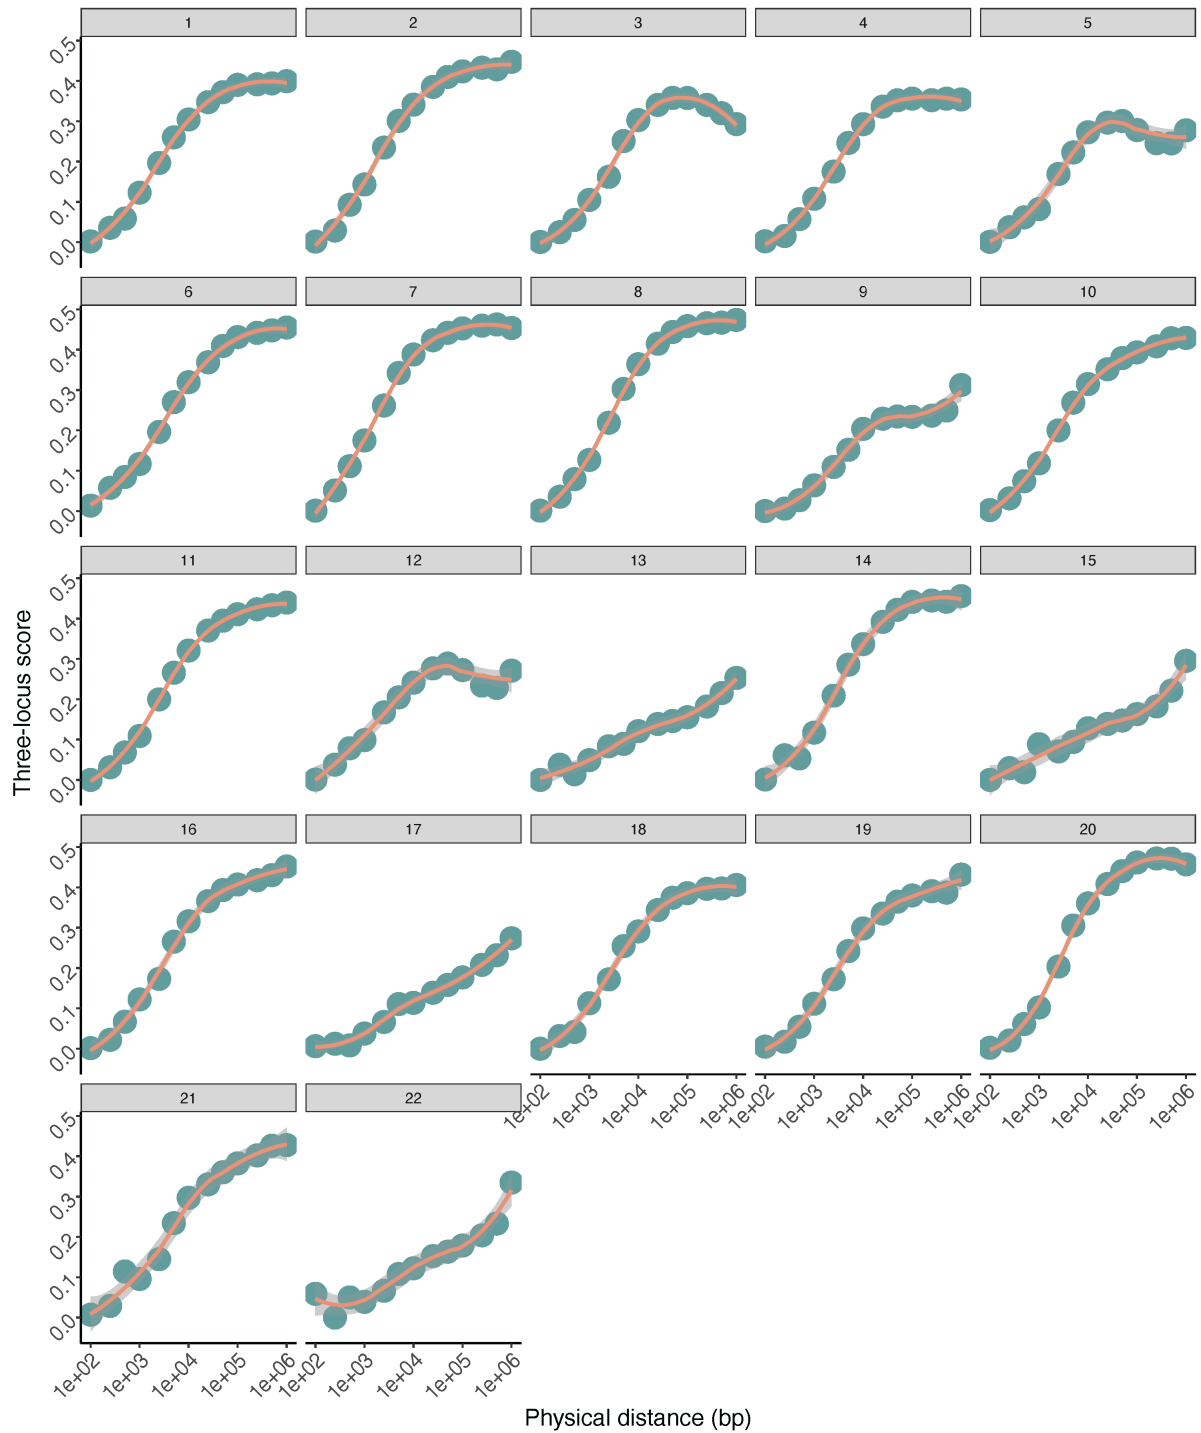

**Fig. S10 Three-locus LD refinement score on germline SNVs from the TNBC sample measured in single-cell DNA.** Haplotypes are grouped based on their distance into 13 bins with <100bp, (100bp, 250bp), (250bp, 500bp), (500bp, 1kb), (1kb,



2.5kb), (2.5kb, 5kb), (5kb, 10kb), (10kb, 25kb), (25kb, 50kb), (50kb, 100kb), (100kb, 250kb), (250kb, 500kb) and >500kb. The X-axis is in logarithmic scale. Y-axis shows the mean value of scores for all pairs within each bin together with the 95% confidence interval. Each panel shows the result from one chromosome.



**Fig. S11 Feature distribution on positive and negative labels used in the SVM module for single-cell RNA data (N=274,568).** For each box in (e, f), the centerline defines the median, the height of the box is given by the interquartile range (IQR), the whiskers are given by  $1.5 \times \text{IQR}$  and outliers are given as points beyond the minimum or maximum whisker.

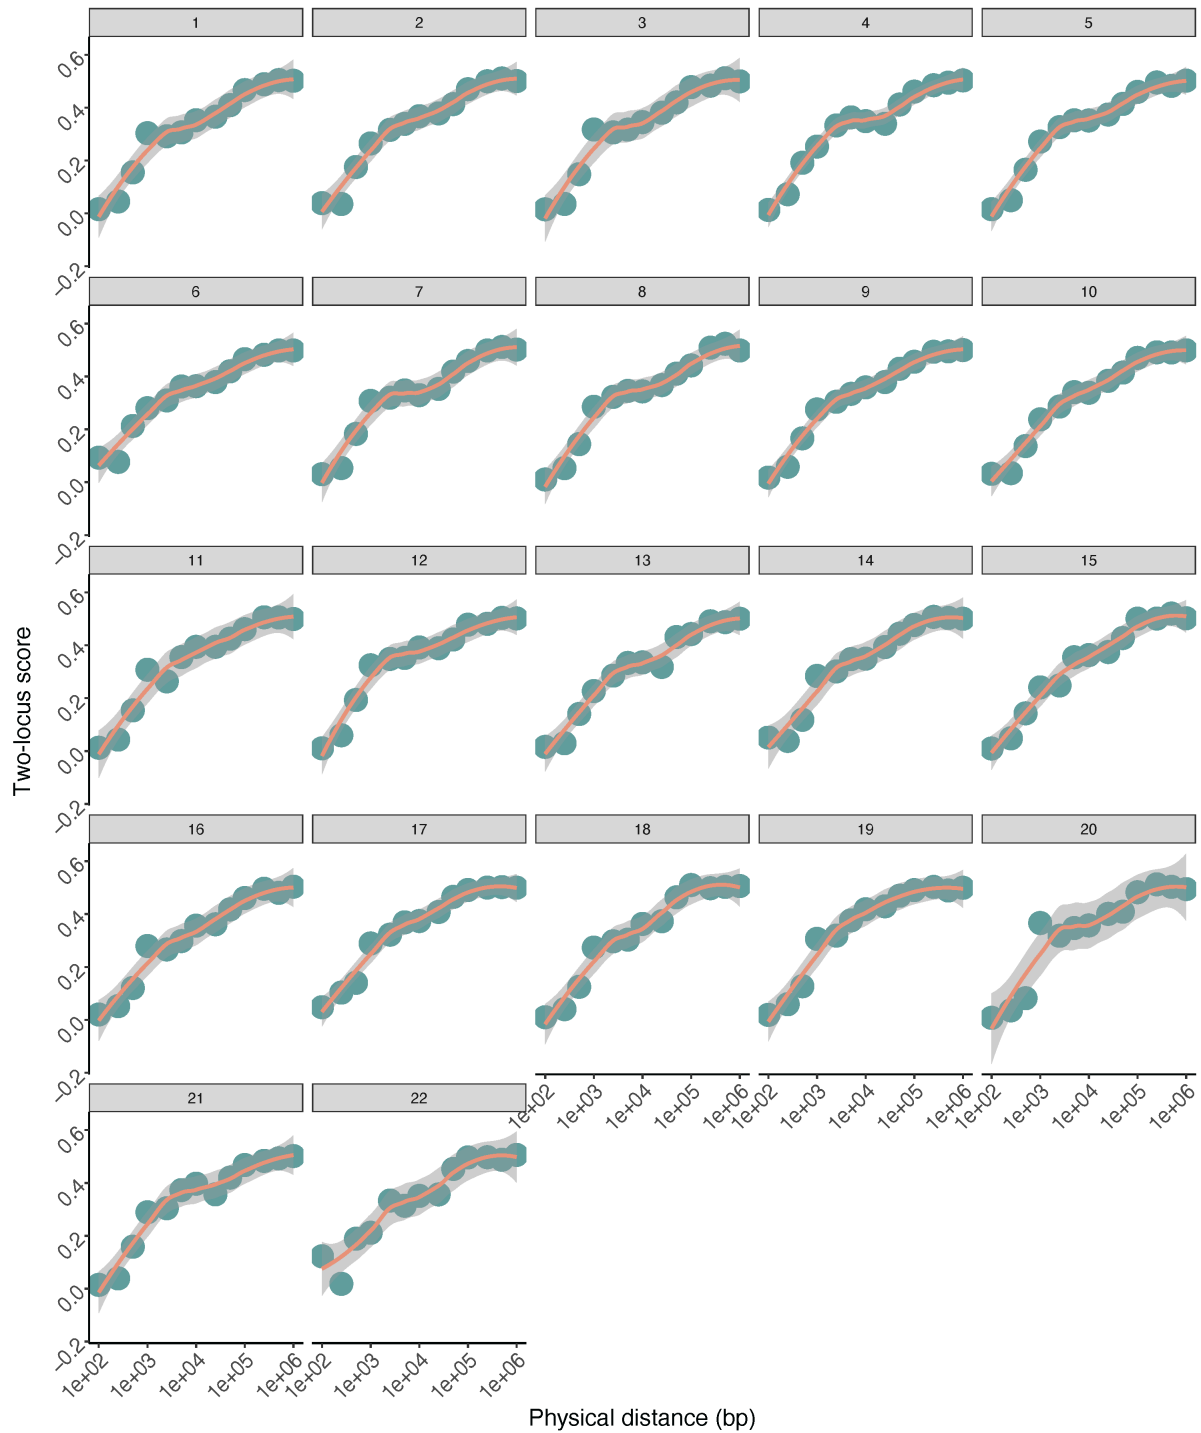

**Fig. S12 Two-locus LD refinement score on germline SNVs from the TNBC sample measured in single-cell RNA data.** Haplotypes are grouped based on their distance into 13 bins with <100bp, (100bp, 250bp), (250bp, 500bp), (500bp, 1kb), (1kb, 2.5kb),

(2.5kb, 5kb), (5kb, 10kb), (10kb, 25kb), (25kb, 50kb), (50kb, 100kb), (100kb, 250kb), (250kb, 500kb) and >500kb. The X-axis is in logarithmic scale. Y-axis shows the mean value of score for all pairs within each bin together with the 95% confidence interval. Each panel shows the result from one chromosome.

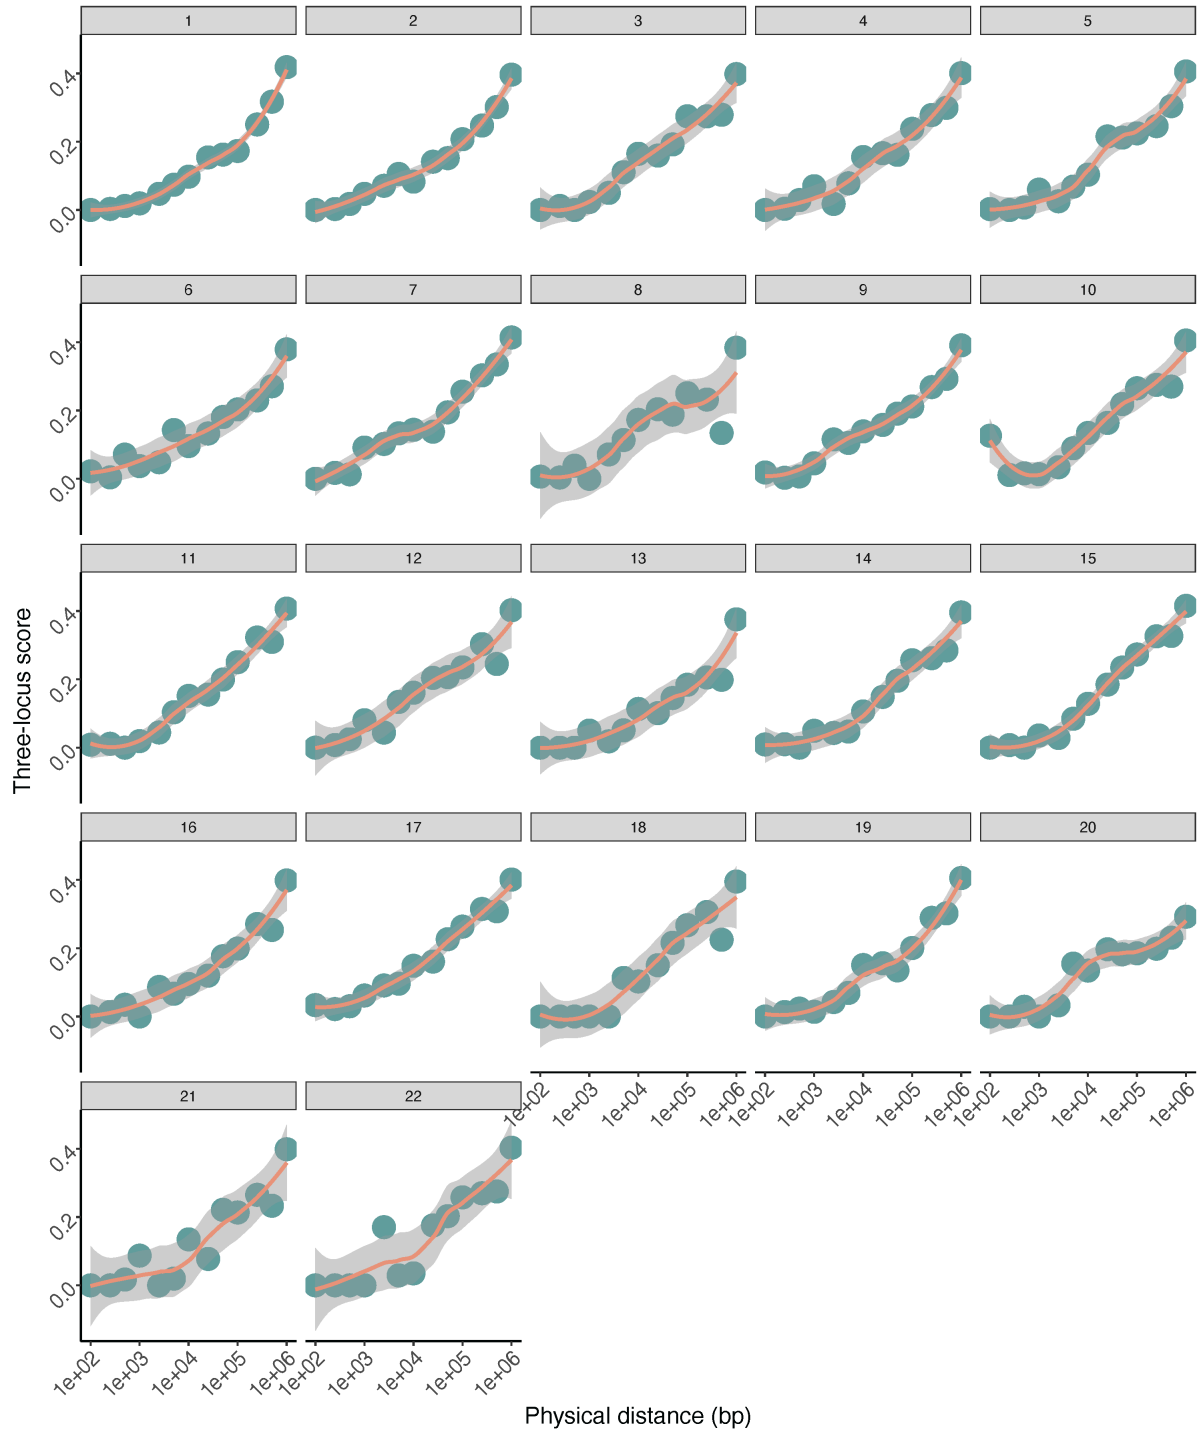

**Fig. S13 Three-locus LD refinement score on germline SNVs from the TNBC sample measured in single-cell RNA data.** Haplotypes are grouped based on their distance into 13 bins with <100bp, (100bp, 250bp), (250bp, 500bp), (500bp, 1kb), (1kb,

2.5kb), (2.5kb, 5kb), (5kb, 10kb), (10kb, 25kb), (25kb, 50kb), (50kb, 100kb), (100kb, 250kb), (250kb, 500kb) and >500kb. The X-axis is in logarithmic scale. Y-axis shows the mean value of score for all pairs within each bin together with the 95% confidence interval. Each panel shows the result from one chromosome.

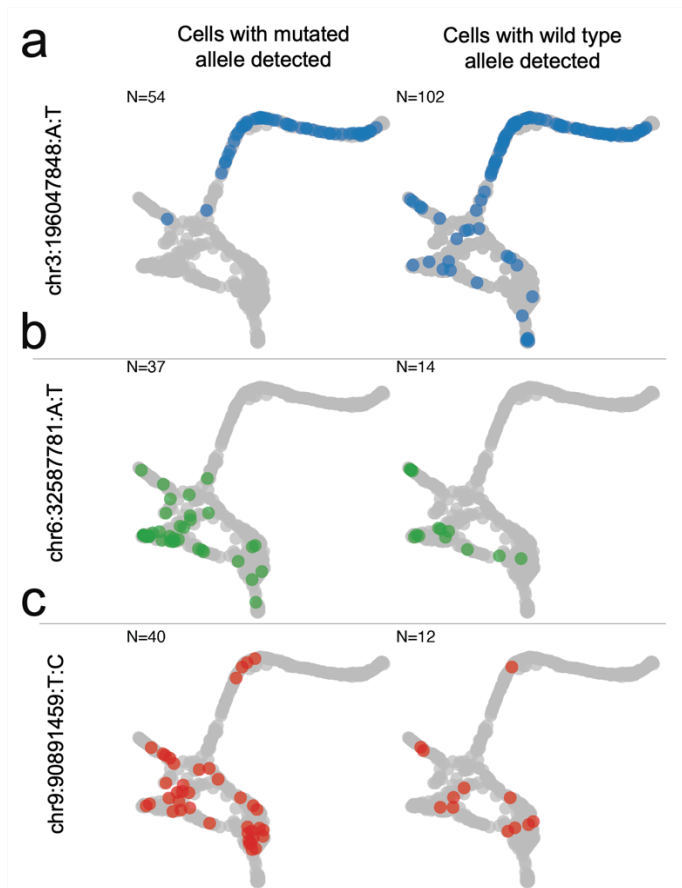

**Fig. S14 UMAP displaying distribution of cells with mutated reads, wild type reads for selected somatic SNVs at cell population level (related to Fig. 5m). From top to bottom is chr3:196047848A>T (a), chr6:32587781A>T (b), and chr9:90891459T>C (c). The number of cells with reads detected are labeled on the top left corner in each figure.**

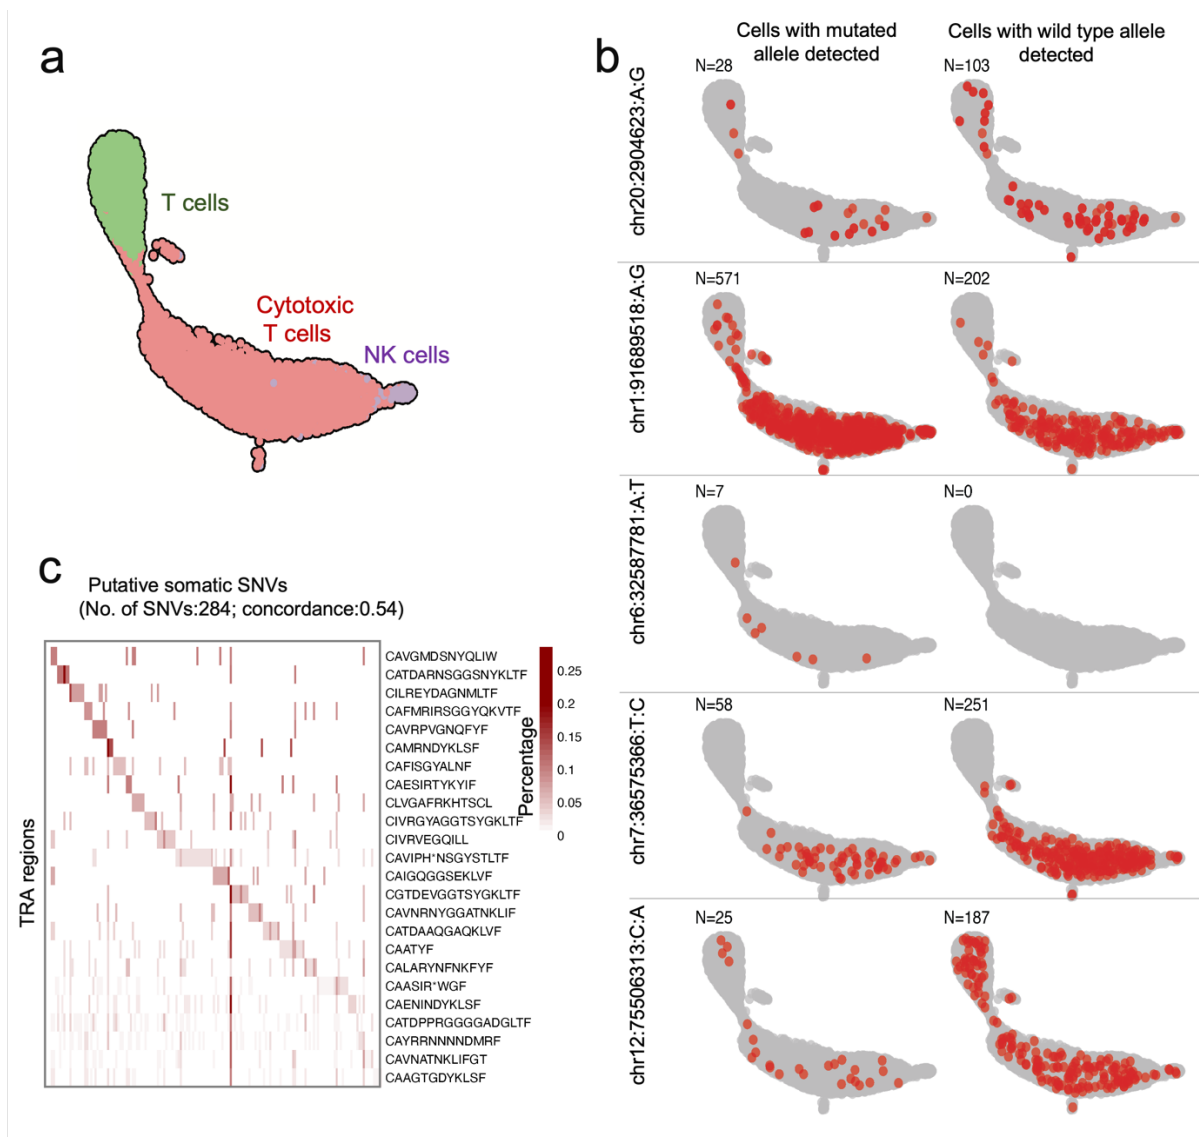

**Fig. S15 Comparison between putative somatic SNVs and TCR clones from scRNA-seq data (Related to Fig. 5n-s).** **a**, UMAPs displaying cell types annotated in T/NK cell lineages. **b**, UMAPs displaying the distribution of cells with mutated reads, wild type reads detected for selected putative somatic SNVs. The number of cells with reads detected are labeled on the top left corner in each figure. **c**, Heatmap displaying the detected percentage of putative somatic SNVs in each TRA clone. The sum of each row is 1. For TRA region evaluation, we evaluate 569 cells with both somatic SNVs and TRB region detected. There are 126 somatic SNVs (among 239 somatic SNVs detected



in at least two cells) showing TRA region enrichment (**Methods**). The cellular concordance between somatic SNV and TRA clones is 0.54.

# Supplementary Tables

| Study      | SampleID                      | No. of cells | No. of reads       | No. of reads per cell | Read length | No. of SNVs in WGS (M) | No. of SNVs in single cell sequencing (N) | No. of SNVs overlapping (TP) | 0/1->1/1 | 1/1->0/1 | Recall (TP/M) | Precision (TP/N) | Genotyping accuracy | Overall accuracy |
|------------|-------------------------------|--------------|--------------------|-----------------------|-------------|------------------------|-------------------------------------------|------------------------------|----------|----------|---------------|------------------|---------------------|------------------|
| snRNA-seq  | Retina                        | 19D013       | 21016 <sup>a</sup> | 722847191             | 33133       | 4043921                | 830799                                    | 823045                       | 2479     | 15114    | 0.203         | 0.991            | 0.979               | 0.970            |
|            |                               | 19D014       | 20127              | 717949095             | 35670       | 4069978                | 827731                                    | 820017                       | 2476     | 15585    | 0.201         | 0.991            | 0.979               | 0.970            |
|            |                               | 19D015       | 26395              | 619591103             | 23473       | 4147482                | 885699                                    | 878596                       | 2746     | 13108    | 0.212         | 0.992            | 0.982               | 0.974            |
|            |                               | 19D018       | 25340              | 594626499             | 25340       | 3925722                | 905395                                    | 892993                       | 3276     | 12540    | 0.227         | 0.986            | 0.983               | 0.970            |
|            |                               | ENCDO        | 12122 <sup>b</sup> | 67690360              | 5584        | 3900140                | 1133545                                   | 1126660                      | 4068     | 16289    | 0.289         | 0.994            | 0.982               | 0.976            |
| scATAC-seq | Transverse colon              | ENCDO        | 12611              | 61044400              | 4840        | 3728381                | 755565                                    | 752150                       | 4038     | 28779    | 0.202         | 0.995            | 0.957               | 0.952            |
|            |                               | ENCDO        |                    |                       |             |                        |                                           |                              |          |          |               |                  |                     |                  |
| scDNA      |                               | ENCDO        |                    |                       |             |                        |                                           |                              |          |          |               |                  |                     |                  |
|            | Triple-Negative Breast Cancer | TN28         | 1534               | 2780180418            |             | 3709485                | 3229120                                   | 3105841                      | 1924     | 2405     | 0.837         | 0.962            | 0.999               | 0.960            |

**Table S1.** Summary of SNV calling for three benchmarking datasets for Monopogen. <sup>a</sup>: cells with at least 500 genes expressed. <sup>b</sup>: cells with at least 500 peaks detected.

| Platform         | Study               | SampleID                                        | No. of SNVs<br>in WGS (M) | No. of SNVs<br>in single cells (N) | No. of SNVs<br>overlapping (TP) | 0/1->1/1 | 1/1->0/1 | Recall<br>(TPW) | Precision<br>(TPN) | Genotyping<br>accuracy | Overall<br>accuracy |
|------------------|---------------------|-------------------------------------------------|---------------------------|------------------------------------|---------------------------------|----------|----------|-----------------|--------------------|------------------------|---------------------|
| <b>StarTools</b> | Transverse<br>colon | sPATAC-seq<br>ENCCO<br>845MKR<br>ENCCO<br>793XB | 3900140                   | 188322                             | 186554                          | 64750    | 270      | 0.048           | 0.986              | 0.650                  | 0.641               |
|                  |                     |                                                 | 3728381                   | 331891                             | 323371                          | 93192    | 40       | 0.088           | 0.992              | 0.717                  | 0.711               |
|                  |                     |                                                 | 3709485                   | 3241101                            | 2992188                         | 2281     | 3079     | 0.807           | 0.923              | 0.998                  | 0.922               |
|                  |                     |                                                 | 190013                    | 4043921                            | 423234                          | 3177     | 2724     | 0.105           | 0.396              | 0.986                  | 0.391               |
|                  |                     |                                                 | 190014                    | 4069978                            | 463466                          | 3016     | 3016     | 0.114           | 0.416              | 0.985                  | 0.410               |
|                  |                     |                                                 | 190015                    | 4147482                            | 455319                          | 2395     | 2583     | 0.110           | 0.511              | 0.989                  | 0.505               |
| GATK             | Transverse<br>colon | sPATAC-seq<br>ENCCO<br>845MKR<br>ENCCO<br>793XB | 3900140                   | 926002                             | 444872                          | 2216     | 3238     | 0.113           | 0.481              | 0.988                  | 0.475               |
|                  |                     |                                                 | 3900140                   | 507967                             | 464775                          | 95537    | 627      | 0.119           | 0.915              | 0.793                  | 0.726               |
|                  |                     |                                                 | 3728381                   | 292831                             | 256275                          | 53060    | 98       | 0.069           | 0.876              | 0.793                  | 0.694               |
|                  |                     |                                                 | 3709485                   | 3471636                            | 3134327                         | 6303     | 5100     | 0.845           | 0.903              | 0.996                  | 0.900               |
|                  |                     |                                                 | 190013                    | 4043921                            | 706721                          | 70406    | 4395     | 0.175           | 0.318              | 0.894                  | 0.285               |
|                  |                     |                                                 | 190014                    | 4069978                            | 2448445                         | 761853   | 74415    | 0.187           | 0.311              | 0.896                  | 0.279               |
| FreeBayes        | Transverse<br>colon | sPATAC-seq<br>ENCCO<br>845MKR<br>ENCCO<br>793XB | 3900140                   | 451171                             | 357967                          | 80322    | 196      | 0.096           | 0.793              | 0.775                  | 0.615               |
|                  |                     |                                                 | 3728381                   | 533244                             | 447602                          | 107657   | 614      | 0.115           | 0.839              | 0.758                  | 0.636               |
|                  |                     |                                                 | 3709485                   | 4611154                            | 3178583                         | 8530     | 5118     | 0.857           | 0.889              | 0.996                  | 0.886               |
|                  |                     |                                                 | 190013                    | 4043921                            | 3338123                         | 950903   | 78358    | 0.235           | 0.285              | 0.880                  | 0.242               |
|                  |                     |                                                 | 190014                    | 4069978                            | 1009174                         | 80679    | 67359    | 0.246           | 0.277              | 0.853                  | 0.236               |
|                  |                     |                                                 | 190015                    | 4147482                            | 3528383                         | 1044988  | 70069    | 0.252           | 0.296              | 0.870                  | 0.258               |
| Strelka2         | Transverse<br>colon | sPATAC-seq<br>ENCCO<br>845MKR<br>ENCCO<br>793XB | 3900140                   | 1520434                            | 904901                          | 73670    | 245371   | 0.243           | 0.595              | 0.647                  | 0.385               |
|                  |                     |                                                 | 3728381                   | 2178921                            | 1120091                         | 97536    | 296947   | 0.287           | 0.515              | 0.648                  | 0.333               |
|                  |                     |                                                 | 3709485                   | 4802952                            | 3217751                         | 6736     | 18092    | 0.867           | 0.670              | 0.992                  | 0.665               |
|                  |                     |                                                 | 190013                    | 4043921                            | 158406                          | 1856     | 1249     | 0.039           | 0.947              | 0.980                  | 0.928               |
|                  |                     |                                                 | 190014                    | 4069978                            | 169861                          | 1690     | 2269     | 0.042           | 0.940              | 0.976                  | 0.917               |
|                  |                     |                                                 | 190015                    | 4147482                            | 171554                          | 161715   | 1072     | 0.039           | 0.931              | 0.987                  | 0.931               |
| cellSNP          | Transverse<br>colon | sPATAC-seq<br>ENCCO<br>845MKR<br>ENCCO<br>793XB | 3900140                   | 172493                             | 161512                          | 2337     | 1520     | 0.041           | 0.936              | 0.976                  | 0.914               |
|                  |                     |                                                 | 3900140                   | 6788                               | 6454                            | 0        | 0        | 0.002           | 0.953              | 1.000                  | 0.953               |
|                  |                     |                                                 | 3728381                   | 7735                               | 7408                            | 163      | 81       | 0.002           | 0.958              | 0.967                  | 0.926               |
|                  |                     |                                                 | 3709485                   | 857082                             | 837738                          | 394      | 1202     | 0.226           | 0.977              | 0.998                  | 0.976               |
|                  |                     |                                                 | 190013                    | 4043921                            | 649747                          | 14878    | 208903   | 0.161           | 0.076              | 0.656                  | 0.050               |
|                  |                     |                                                 | 190014                    | 4069978                            | 690091                          | 13924    | 256002   | 0.170           | 0.071              | 0.609                  | 0.043               |
| scallop          | Transverse<br>colon | sPATAC-seq<br>ENCCO<br>845MKR<br>ENCCO<br>793XB | 3900140                   | 8805378                            | 630511                          | 10106    | 217430   | 0.161           | 0.072              | 0.639                  | 0.046               |
|                  |                     |                                                 | 3900140                   | 424312                             | 86578                           | 78       | 31089    | 0.023           | 0.204              | 0.640                  | 0.131               |
|                  |                     |                                                 | 3728381                   | 581288                             | 68312                           | 163      | 29528    | 0.018           | 0.118              | 0.580                  | 0.088               |

**Table S2.** Summary of SNV calling for three benchmarking datasets for Samtools, GATK, FreeBayes, strelka, cellSNP and scAllele.

| Fraction of clusters with SNV | SampleID | No. of SNVs called (N) | No. of SNVs overlapping in WGS (TP) | 0/1->0/1 | 0/1->1/1 | 1/1->0/1 | 1/1->1/1 | Precision (TP/N) | Genotyping accuracy | Overall accuracy |
|-------------------------------|----------|------------------------|-------------------------------------|----------|----------|----------|----------|------------------|---------------------|------------------|
| >0                            | 19D013   | 129942                 | 37674                               | 37545    | 45       | 79       | 5        | 0.29             | 0.997               | 0.289            |
| >0.1                          | 19D013   | 124875                 | 37616                               | 37497    | 36       | 79       | 4        | 0.301            | 0.997               | 0.300            |
| >0.2                          | 19D013   | 106891                 | 37228                               | 37138    | 15       | 74       | 1        | 0.348            | 0.998               | 0.347            |
| >0.3                          | 19D013   | 83565                  | 36334                               | 36261    | 4        | 69       | 0        | 0.435            | 0.998               | 0.434            |
| >0.4                          | 19D013   | 64935                  | 34919                               | 34855    | 3        | 61       | 0        | 0.538            | 0.998               | 0.537            |
| >0.5                          | 19D013   | 51398                  | 32558                               | 32499    | 2        | 57       | 0        | 0.633            | 0.998               | 0.632            |
| >0.6                          | 19D013   | 41769                  | 29500                               | 29454    | 1        | 45       | 0        | 0.706            | 0.998               | 0.705            |
| >0.7                          | 19D013   | 33213                  | 25027                               | 24985    | 1        | 41       | 0        | 0.754            | 0.998               | 0.752            |
| >0.8                          | 19D013   | 24199                  | 19079                               | 19051    | 0        | 28       | 0        | 0.788            | 0.999               | 0.787            |
| >0.9                          | 19D013   | 12247                  | 10031                               | 10020    | 0        | 11       | 0        | 0.819            | 0.999               | 0.818            |
| >0                            | 19D014   | 118783                 | 36182                               | 35979    | 72       | 126      | 5        | 0.305            | 0.995               | 0.303            |
| >0.1                          | 19D014   | 114956                 | 36134                               | 35941    | 62       | 126      | 5        | 0.314            | 0.995               | 0.312            |
| >0.2                          | 19D014   | 99169                  | 35821                               | 35670    | 27       | 123      | 1        | 0.361            | 0.996               | 0.360            |
| >0.3                          | 19D014   | 77232                  | 35067                               | 34950    | 3        | 114      | 0        | 0.454            | 0.997               | 0.453            |
| >0.4                          | 19D014   | 59934                  | 33806                               | 33702    | 1        | 103      | 0        | 0.564            | 0.997               | 0.562            |
| >0.5                          | 19D014   | 47528                  | 31686                               | 31593    | 0        | 93       | 0        | 0.667            | 0.997               | 0.665            |
| >0.6                          | 19D014   | 38688                  | 28707                               | 28630    | 0        | 77       | 0        | 0.742            | 0.997               | 0.740            |
| >0.7                          | 19D014   | 30583                  | 24332                               | 24265    | 0        | 67       | 0        | 0.796            | 0.997               | 0.794            |
| >0.8                          | 19D014   | 22171                  | 18406                               | 18359    | 0        | 47       | 0        | 0.83             | 0.997               | 0.828            |
| >0.9                          | 19D014   | 11150                  | 9463                                | 9432     | 0        | 31       | 0        | 0.849            | 0.997               | 0.846            |
| >0                            | 19D015   | 69548                  | 29467                               | 29370    | 34       | 59       | 4        | 0.424            | 0.997               | 0.423            |
| >0.1                          | 19D015   | 67710                  | 29441                               | 29351    | 27       | 59       | 4        | 0.435            | 0.997               | 0.434            |
| >0.2                          | 19D015   | 59270                  | 29201                               | 29136    | 8        | 55       | 2        | 0.493            | 0.998               | 0.492            |
| >0.3                          | 19D015   | 48496                  | 28717                               | 28663    | 1        | 52       | 1        | 0.592            | 0.998               | 0.591            |
| >0.4                          | 19D015   | 40188                  | 27902                               | 27851    | 1        | 50       | 0        | 0.694            | 0.998               | 0.693            |
| >0.5                          | 19D015   | 34524                  | 26581                               | 26537    | 0        | 44       | 0        | 0.77             | 0.998               | 0.768            |
| >0.6                          | 19D015   | 30417                  | 24877                               | 24836    | 0        | 41       | 0        | 0.818            | 0.998               | 0.816            |
| >0.7                          | 19D015   | 26685                  | 22655                               | 22622    | 0        | 33       | 0        | 0.849            | 0.999               | 0.848            |
| >0.8                          | 19D015   | 20575                  | 18207                               | 18181    | 0        | 26       | 0        | 0.885            | 0.999               | 0.884            |
| >0.9                          | 19D015   | 12066                  | 10952                               | 10939    | 0        | 13       | 0        | 0.908            | 0.999               | 0.907            |
| >0                            | 19D016   | 79931                  | 30432                               | 30258    | 47       | 123      | 4        | 0.381            | 0.994               | 0.379            |
| >0.1                          | 19D016   | 77746                  | 30394                               | 30230    | 37       | 123      | 4        | 0.391            | 0.995               | 0.389            |
| >0.2                          | 19D016   | 67693                  | 30187                               | 30050    | 13       | 120      | 4        | 0.446            | 0.996               | 0.444            |
| >0.3                          | 19D016   | 54813                  | 29641                               | 29520    | 3        | 117      | 1        | 0.541            | 0.996               | 0.539            |
| >0.4                          | 19D016   | 44836                  | 28825                               | 28712    | 0        | 112      | 1        | 0.643            | 0.996               | 0.640            |
| >0.5                          | 19D016   | 38119                  | 27556                               | 27449    | 0        | 106      | 1        | 0.723            | 0.996               | 0.720            |
| >0.6                          | 19D016   | 33143                  | 25756                               | 25663    | 0        | 92       | 1        | 0.777            | 0.996               | 0.774            |
| >0.7                          | 19D016   | 28721                  | 23278                               | 23196    | 0        | 82       | 0        | 0.81             | 0.996               | 0.807            |
| >0.8                          | 19D016   | 22224                  | 18922                               | 18859    | 0        | 63       | 0        | 0.851            | 0.997               | 0.848            |
| >0.9                          | 19D016   | 12548                  | 10972                               | 10942    | 0        | 30       | 0        | 0.874            | 0.997               | 0.871            |

**Table S3.** Summary of novel SNVs detected from Monopogen in 4 retina snRNA-seq samples.

|                             | SampleID      | No. of cells | No. of reads | No. of reads per cell | Read length | No. of germline SNVs |
|-----------------------------|---------------|--------------|--------------|-----------------------|-------------|----------------------|
| Asia Immune Diversity Study | JP_H045       | 1569         | 59239054     | 37755                 | 150bp       | 121313               |
|                             | JP_H046       | 1189         | 39486450     | 33209                 | 150bp       | 99964                |
|                             | JP_H047       | 1221         | 41068349     | 33635                 | 150bp       | 110858               |
|                             | JP_H048       | 1142         | 37410391     | 32758                 | 150bp       | 93531                |
|                             | JP_H137       | 1197         | 45362685     | 37896                 | 150bp       | 124220               |
|                             | JP_H146       | 1117         | 44239330     | 39605                 | 150bp       | 112796               |
|                             | JP_H148       | 1112         | 44318390     | 39854                 | 150bp       | 120655               |
|                             | JP_H149       | 1411         | 57020159     | 40411                 | 150bp       | 132721               |
|                             | KR_H001       | 1264         | 57476150     | 45471                 | 150bp       | 163256               |
|                             | KR_H002       | 840          | 35435379     | 42184                 | 150bp       | 118850               |
|                             | KR_H004       | 821          | 34368945     | 41862                 | 150bp       | 128936               |
|                             | KR_H005       | 918          | 35884600     | 39089                 | 150bp       | 114778               |
|                             | KR_H160       | 1279         | 47380301     | 37044                 | 150bp       | 120229               |
|                             | KR_H161       | 1573         | 57235627     | 36386                 | 150bp       | 131808               |
|                             | KR_H164       | 1573         | 57235627     | 36386                 | 150bp       | 120423               |
|                             | KR_H165       | 1602         | 52719939     | 32908                 | 150bp       | 103942               |
|                             | Lonza_3038016 | 1300         | 40815193     | 31396                 | 150bp       | 102320               |
|                             | Lonza_3038097 | 999          | 44136732     | 44180                 | 150bp       | 98936                |
| Lonza_3038099               | 1049          | 48096207     | 45849        | 150bp                 | 77076       |                      |
| Lonza_3038306               | 761           | 23257052     | 30561        | 150bp                 | 82056       |                      |
| Human Breast Cell Atlas     | HBCA02C       | 1709         | 324492736    | 189872                | 125bp       | 256088               |
|                             | HBCA02i       | 2232         | 331161319    | 148369                | 125bp       | 369781               |
|                             | HBCA03C       | 1865         | 356381426    | 191089                | 125bp       | 471241               |
|                             | HBCA03Ccryo   | 1525         | 348639606    | 228616                | 125bp       | 310490               |
|                             | HBCA03i       | 1470         | 356132757    | 242267                | 125bp       | 442943               |
|                             | HBCA04C       | 1810         | 357352385    | 197432                | 125bp       | 380657               |
|                             | HBCA04i       | 759          | 349784479    | 460849                | 125bp       | 390222               |
|                             | HBCA04T       | 1608         | 348689072    | 216846                | 125bp       | 352607               |
|                             | HBCA05C       | 464          | 362981567    | 782287                | 125bp       | 441287               |
|                             | HBCA05Ccryo   | 1145         | 349034669    | 304833                | 125bp       | 293419               |
|                             | HBCA05i       | 1663         | 348892182    | 209796                | 125bp       | 430660               |
|                             | HBCA06C       | 1045         | 330866587    | 316618                | 125bp       | 390307               |
|                             | HBCA07C       | 1405         | 320441257    | 228072                | 125bp       | 379910               |
|                             | HBCA07i       | 2451         | 319876418    | 130508                | 125bp       | 429340               |
|                             | HBCA07T       | 2226         | 314283146    | 141187                | 125bp       | 454028               |
|                             | HBCA09C       | 1231         | 319872861    | 259847                | 125bp       | 385241               |
|                             | HBCA09i       | 2027         | 323445690    | 159568                | 125bp       | 314550               |
|                             | HBCA10C       | 1466         | 362133748    | 247021                | 125bp       | 267024               |
| HBCA10Ccryo                 | 1297          | 348249946    | 268504       | 125bp                 | 300322      |                      |
| HBCA10i                     | 891           | 345961110    | 388284       | 125bp                 | 237928      |                      |
| GETx                        | GTEX-13N11    | 5226         | 119605363    | 22887                 | 100bp       | 300538               |
|                             | GTEX-144GM    | 5289         | 89603310     | 16941                 | 100bp       | 181382               |
|                             | GTEX-15CHR    | 3508         | 115170743    | 32830                 | 100bp       | 155046               |
|                             | GTEX-15RIE    | 5001         | 114957894    | 22987                 | 100bp       | 205432               |
|                             | GTEX-15SB6    | 4819         | 128624204    | 26691                 | 100bp       | 304507               |
|                             | GTEX-16BQI    | 5269         | 116701973    | 22148                 | 100bp       | 211307               |
| GTEX-11CG6                  | 4148          | 109050028    | 26289        | 100bp                 | 216682      |                      |

**Table S4.** Summary of SNV calling for AIDA, HBCA, and GETx cohorts.

| SampleID    | No. of SNVs in snRNA-seq | No. of SNVs in snATAC-seq | SampleID    | No. of SNVs in snRNA-seq | No. of SNVs in snATAC-seq |
|-------------|--------------------------|---------------------------|-------------|--------------------------|---------------------------|
| ENCDO738SLM | 537076                   | 2602120                   | ENCDO271OUW | N.A                      | 2468503                   |
| ENCDO575WHY | 788194                   | 2599335                   | ENCDO793LXB | N.A                      | 2590288                   |
| ENCDO377SFB | 646028                   | 2595870                   | ENCDO189VYV | 698813                   | 2601870                   |
| ENCDO411EVD | 790506                   | 2592981                   | ENCDO123GXG | 726431                   | 2594985                   |
| ENCDO650FUH | 949924                   | 2609254                   | ENCDO266KDE | 1031286                  | 2591638                   |
| ENCDO229CTV | 998609                   | 2591653                   | ENCDO182VFD | 942648                   | 2601761                   |
| ENCDO934DRK | 984814                   | 2603980                   | ENCDO308XYT | 704328                   | 2600948                   |
| ENCDO269PFV | 1176624                  | 2593567                   | ENCDO239INK | 802663                   | 2591464                   |
| ENCDO107KXS | 954463                   | 2460631                   | ENCDO971VRE | 939773                   | 2587254                   |
| ENCDO435KUZ | 903239                   | 2595532                   | ENCDO423HZU | 892430                   | 2459095                   |
| ENCDO184BIH | 760618                   | 2530747                   | ENCDO593PZY | 1061712                  | 2453326                   |
| ENCDO602PYC | 752144                   | 2594180                   | ENCDO862XAV | 719859                   | 2610909                   |
| ENCDO038QFX | 676060                   | 2596614                   | ENCDO212WIV | 642434                   | 2579584                   |
| ENCDO216BMM | 707303                   | 2619222                   | ENCDO280SCV | 671894                   | 2599335                   |
| ENCDO528BHB | 780800                   | 2596634                   | ENCDO817MDD | 693944                   | 2623213                   |
| ENCDO737TEG | 881202                   | 2608524                   | ENCDO607DMC | 685762                   | 2587715                   |
| ENCDO061UFT | 759082                   | 2617048                   | ENCDO446FXE | 690928                   | 2597200                   |
| ENCDO751PQQ | 1063673                  | 2608314                   | ENCDO110LFV | 710207                   | 2599868                   |
| ENCDO874YWU | 632607                   | 2587876                   | ENCDO477WED | N.A                      | 2481147                   |
| ENCDO639HZG | 706263                   | 2462721                   | ENCDO768WUT | 680723                   | 2599976                   |
| ENCDO545EJY | 804425                   | 2446069                   | ENCDO208BPU | 649945                   | 2589330                   |
| ENCDO739PAW | 592706                   | 2602392                   | ENCDO098ZMW | 634326                   | 2589542                   |
| ENCDO750LVJ | 1038750                  | 2589178                   | ENCDO695LFW | 702332                   | 2618752                   |
| ENCDO580GZH | 1085464                  | 2466424                   | ENCDO907YUG | N.A                      | 2964332                   |
| ENCDO894OKI | 881239                   | 2588923                   | ENCDO967KID | N.A                      | 2596910                   |
| ENCDO187SDN | 908590                   | 2603997                   | ENCDO804CLC | N.A                      | 2585524                   |
| ENCDO865TFF | 790664                   | 2459535                   | ENCDO926KEV | N.A                      | 2693594                   |
| ENCDO076AMT | 418685                   | 2601072                   | ENCDO808ASZ | N.A                      | 2627648                   |
| ENCDO068KYD | 886965                   | 2599461                   | ENCDO439CAZ | N.A                      | 2605541                   |
| ENCDO522PCG | 706117                   | 2613923                   | ENCDO039RUH | N.A                      | 2607601                   |
| ENCDO529CYH | 669832                   | 2615742                   | ENCDO121UJI | N.A                      | 2633926                   |
| ENCDO856ZOJ | 888770                   | 2600768                   | ENCDO240MDH | 639683                   | 2597854                   |
|             |                          |                           | ENCDO166SII | 658079                   | 2587348                   |

**Table S5.** Summary of SNV calling from heart left ventricle samples. N.A: not available.



| rsID        | CHR | POS       | A1 | A2 | AF1   | BETA   | SE    | P        | distancetoFeature | symbol    |
|-------------|-----|-----------|----|----|-------|--------|-------|----------|-------------------|-----------|
| rs12748496  | 1   | 59020879  | A  | G  | 0.265 | 0.168  | 0.038 | 8.08E-06 | 87235             | LINC01358 |
| rs12124171  | 1   | 80188832  | G  | A  | 0.204 | -0.206 | 0.042 | 8.70E-07 | -346924           | LINC01781 |
| rs10159130  | 1   | 80192436  | C  | T  | 0.204 | -0.206 | 0.042 | 8.70E-07 | -343320           | LINC01781 |
| rs11162948  | 1   | 80192975  | C  | T  | 0.204 | -0.206 | 0.042 | 8.70E-07 | -342781           | LINC01781 |
| rs17104484  | 1   | 80193168  | C  | A  | 0.204 | -0.206 | 0.042 | 8.70E-07 | -342588           | LINC01781 |
| rs11162949  | 1   | 80195006  | G  | A  | 0.204 | -0.206 | 0.042 | 8.70E-07 | -340750           | LINC01781 |
| rs10782722  | 1   | 80197213  | G  | A  | 0.204 | -0.206 | 0.042 | 8.70E-07 | -338543           | LINC01781 |
| rs10782723  | 1   | 80197498  | C  | G  | 0.204 | -0.206 | 0.042 | 8.70E-07 | -338258           | LINC01781 |
| rs1529999   | 2   | 118476740 | T  | C  | 0.500 | -0.128 | 0.028 | 5.87E-06 | 370939            | EN1       |
| rs4849701   | 2   | 118478920 | C  | T  | 0.510 | -0.139 | 0.028 | 6.15E-07 | 368759            | EN1       |
| rs6542466   | 2   | 118481948 | A  | G  | 0.520 | -0.133 | 0.028 | 1.72E-06 | 365731            | EN1       |
| rs4848510   | 2   | 118482581 | A  | C  | 0.449 | -0.129 | 0.028 | 4.12E-06 | 365098            | EN1       |
| rs1344896   | 2   | 118492854 | T  | C  | 0.449 | -0.129 | 0.028 | 4.12E-06 | 354825            | EN1       |
| rs6752749   | 2   | 118499583 | G  | C  | 0.449 | -0.129 | 0.028 | 4.12E-06 | 348096            | EN1       |
| rs13009652  | 2   | 138959515 | C  | T  | 0.265 | 0.179  | 0.040 | 7.79E-06 | -179166           | NXP2      |
| rs1710827   | 2   | 235760076 | A  | G  | 0.296 | 0.160  | 0.030 | 6.52E-08 | 254324            | AGAP1-IT1 |
| rs2696393   | 2   | 235760409 | G  | A  | 0.296 | 0.160  | 0.030 | 6.52E-08 | 254657            | AGAP1-IT1 |
| rs2696394   | 2   | 235760459 | C  | G  | 0.296 | 0.160  | 0.030 | 6.52E-08 | 254707            | AGAP1-IT1 |
| rs2696395   | 2   | 235760542 | A  | G  | 0.296 | 0.160  | 0.030 | 6.52E-08 | 254790            | AGAP1-IT1 |
| rs2696396   | 2   | 235760568 | G  | A  | 0.296 | 0.160  | 0.030 | 6.52E-08 | 254816            | AGAP1-IT1 |
| rs2675142   | 2   | 235760894 | G  | A  | 0.296 | 0.160  | 0.030 | 6.52E-08 | 255142            | AGAP1-IT1 |
| rs2696397   | 2   | 235761153 | T  | C  | 0.296 | 0.160  | 0.030 | 6.52E-08 | 255401            | AGAP1-IT1 |
| rs72975265  | 2   | 235761194 | G  | A  | 0.296 | 0.160  | 0.030 | 6.52E-08 | 255442            | AGAP1-IT1 |
| rs12469618  | 2   | 235761287 | G  | A  | 0.296 | 0.160  | 0.030 | 6.52E-08 | 255535            | AGAP1-IT1 |
| rs12469659  | 2   | 235761387 | G  | A  | 0.296 | 0.160  | 0.030 | 6.52E-08 | 255635            | AGAP1-IT1 |
| rs6714660   | 2   | 235761752 | C  | T  | 0.296 | 0.160  | 0.030 | 6.52E-08 | 256000            | AGAP1-IT1 |
| rs6715112   | 2   | 235762292 | G  | A  | 0.296 | 0.160  | 0.030 | 6.52E-08 | 256540            | AGAP1-IT1 |
| rs6718263   | 2   | 235762347 | G  | T  | 0.296 | 0.160  | 0.030 | 6.52E-08 | 256595            | AGAP1-IT1 |
| rs2696403   | 2   | 235762546 | A  | G  | 0.296 | 0.160  | 0.030 | 6.52E-08 | 256794            | AGAP1-IT1 |
| rs2696402   | 2   | 235762632 | T  | C  | 0.296 | 0.160  | 0.030 | 6.52E-08 | 256880            | AGAP1-IT1 |
| rs2696401   | 2   | 235762650 | T  | C  | 0.286 | 0.166  | 0.031 | 8.09E-08 | 256898            | AGAP1-IT1 |
| rs2675141   | 2   | 235762859 | C  | T  | 0.296 | 0.160  | 0.030 | 6.52E-08 | 257107            | AGAP1-IT1 |
| rs3896943   | 2   | 235762882 | A  | G  | 0.296 | 0.160  | 0.030 | 6.52E-08 | 257130            | AGAP1-IT1 |
| rs938492    | 2   | 235762995 | C  | G  | 0.306 | 0.157  | 0.030 | 2.33E-07 | 257243            | AGAP1-IT1 |
| rs938491    | 2   | 235763052 | G  | A  | 0.316 | 0.153  | 0.031 | 7.22E-07 | 257300            | AGAP1-IT1 |
| rs2696405   | 2   | 235763462 | C  | T  | 0.306 | 0.157  | 0.030 | 2.33E-07 | 257710            | AGAP1-IT1 |
| rs2696406   | 2   | 235763593 | G  | T  | 0.306 | 0.157  | 0.030 | 2.33E-07 | 257841            | AGAP1-IT1 |
| rs2696407   | 2   | 235763618 | C  | T  | 0.306 | 0.157  | 0.030 | 2.33E-07 | 257866            | AGAP1-IT1 |
| rs552845949 | 2   | 235764030 | G  | T  | 0.286 | 0.157  | 0.032 | 8.88E-07 | 258278            | AGAP1-IT1 |
| rs2675139   | 2   | 235764071 | G  | A  | 0.306 | 0.157  | 0.030 | 2.33E-07 | 258319            | AGAP1-IT1 |
| rs2696409   | 2   | 235764087 | C  | T  | 0.316 | 0.156  | 0.031 | 3.03E-07 | 258335            | AGAP1-IT1 |
| rs2696410   | 2   | 235764169 | A  | G  | 0.306 | 0.157  | 0.030 | 2.33E-07 | 258417            | AGAP1-IT1 |
| rs2675138   | 2   | 235764317 | T  | C  | 0.306 | 0.157  | 0.030 | 2.33E-07 | 258565            | AGAP1-IT1 |
| rs2675136   | 2   | 235764447 | T  | C  | 0.306 | 0.157  | 0.030 | 2.33E-07 | 258695            | AGAP1-IT1 |
| rs2675135   | 2   | 235764536 | G  | C  | 0.296 | 0.161  | 0.032 | 3.06E-07 | 258784            | AGAP1-IT1 |
| rs6712556   | 2   | 235765406 | T  | C  | 0.306 | 0.157  | 0.030 | 2.33E-07 | 259654            | AGAP1-IT1 |
| rs6712558   | 2   | 235765411 | T  | C  | 0.306 | 0.157  | 0.030 | 2.33E-07 | 259659            | AGAP1-IT1 |
| rs2675134   | 2   | 235765760 | C  | T  | 0.306 | 0.157  | 0.030 | 2.33E-07 | 260008            | AGAP1-IT1 |
| rs2675133   | 2   | 235766294 | T  | C  | 0.296 | 0.161  | 0.032 | 3.06E-07 | 260542            | AGAP1-IT1 |
| rs2696386   | 2   | 235766387 | A  | G  | 0.296 | 0.161  | 0.032 | 3.06E-07 | 260635            | AGAP1-IT1 |
| rs2696387   | 2   | 235766438 | T  | G  | 0.306 | 0.157  | 0.030 | 2.33E-07 | 260686            | AGAP1-IT1 |
| rs2675132   | 2   | 235767018 | G  | A  | 0.296 | 0.161  | 0.032 | 3.06E-07 | 261266            | AGAP1-IT1 |
| rs2675131   | 2   | 235767377 | T  | C  | 0.296 | 0.161  | 0.032 | 3.06E-07 | 261625            | AGAP1-IT1 |
| rs2696388   | 2   | 235767450 | C  | T  | 0.296 | 0.161  | 0.032 | 3.06E-07 | 261698            | AGAP1-IT1 |
| rs2675130   | 2   | 235767464 | C  | T  | 0.296 | 0.161  | 0.032 | 3.06E-07 | 261712            | AGAP1-IT1 |
| rs2696389   | 2   | 235767675 | G  | C  | 0.296 | 0.161  | 0.032 | 3.06E-07 | 261923            | AGAP1-IT1 |

|             |   |           |   |   |       |        |       |          |        |           |
|-------------|---|-----------|---|---|-------|--------|-------|----------|--------|-----------|
| rs2675129   | 2 | 235767934 | G | A | 0.296 | 0.161  | 0.032 | 3.06E-07 | 262182 | AGAP1-IT1 |
| rs2696391   | 2 | 235768052 | T | G | 0.296 | 0.161  | 0.032 | 3.06E-07 | 262300 | AGAP1-IT1 |
| rs2696392   | 2 | 235768704 | G | C | 0.296 | 0.161  | 0.032 | 3.06E-07 | 262952 | AGAP1-IT1 |
| rs2675128   | 2 | 235769187 | G | A | 0.296 | 0.161  | 0.032 | 3.06E-07 | 263435 | AGAP1-IT1 |
| rs1728290   | 2 | 235770056 | G | A | 0.296 | 0.161  | 0.032 | 3.06E-07 | 264304 | AGAP1-IT1 |
| rs55907328  | 2 | 235770216 | C | T | 0.296 | 0.161  | 0.032 | 3.06E-07 | 264464 | AGAP1-IT1 |
| rs55749012  | 2 | 235770415 | A | G | 0.296 | 0.161  | 0.032 | 3.06E-07 | 264663 | AGAP1-IT1 |
| rs55797253  | 2 | 235770425 | G | A | 0.296 | 0.161  | 0.032 | 3.06E-07 | 264673 | AGAP1-IT1 |
| rs3108498   | 2 | 235770557 | C | T | 0.306 | 0.157  | 0.030 | 2.33E-07 | 264805 | AGAP1-IT1 |
| rs1710823   | 2 | 235770800 | T | C | 0.296 | 0.161  | 0.032 | 3.06E-07 | 265048 | AGAP1-IT1 |
| rs1710822   | 2 | 235770942 | A | C | 0.306 | 0.157  | 0.030 | 2.33E-07 | 265190 | AGAP1-IT1 |
| rs2675127   | 2 | 235771440 | C | G | 0.296 | 0.161  | 0.032 | 3.06E-07 | 265688 | AGAP1-IT1 |
| rs2675126   | 2 | 235771482 | C | T | 0.296 | 0.161  | 0.032 | 3.06E-07 | 265730 | AGAP1-IT1 |
| rs2675125   | 2 | 235771605 | G | A | 0.296 | 0.161  | 0.032 | 3.06E-07 | 265853 | AGAP1-IT1 |
| rs55926594  | 2 | 235771838 | T | C | 0.296 | 0.161  | 0.032 | 3.06E-07 | 266086 | AGAP1-IT1 |
| rs56071605  | 2 | 235771872 | T | C | 0.296 | 0.161  | 0.032 | 3.06E-07 | 266120 | AGAP1-IT1 |
| rs117993231 | 2 | 235771999 | T | C | 0.286 | 0.162  | 0.033 | 1.36E-06 | 266247 | AGAP1-IT1 |
| rs115957313 | 2 | 235772047 | G | A | 0.296 | 0.161  | 0.032 | 3.06E-07 | 266295 | AGAP1-IT1 |
| rs3108499   | 2 | 235772298 | G | A | 0.296 | 0.161  | 0.032 | 3.06E-07 | 266546 | AGAP1-IT1 |
| rs3106791   | 2 | 235772312 | T | C | 0.296 | 0.161  | 0.032 | 3.06E-07 | 266560 | AGAP1-IT1 |
| rs3106792   | 2 | 235772645 | T | C | 0.296 | 0.161  | 0.032 | 3.06E-07 | 266893 | AGAP1-IT1 |
| rs3108501   | 2 | 235772820 | A | G | 0.296 | 0.161  | 0.032 | 3.06E-07 | 267068 | AGAP1-IT1 |
| rs72977127  | 2 | 235773027 | C | T | 0.296 | 0.161  | 0.032 | 3.06E-07 | 267275 | AGAP1-IT1 |
| rs2696413   | 2 | 235773216 | T | G | 0.296 | 0.161  | 0.032 | 3.06E-07 | 267464 | AGAP1-IT1 |
| rs2696412   | 2 | 235774212 | C | T | 0.296 | 0.161  | 0.032 | 3.06E-07 | 268460 | AGAP1-IT1 |
| rs2696411   | 2 | 235774270 | C | T | 0.296 | 0.161  | 0.032 | 3.06E-07 | 268518 | AGAP1-IT1 |
| rs2249999   | 2 | 235774743 | A | C | 0.296 | 0.161  | 0.032 | 3.06E-07 | 268991 | AGAP1-IT1 |
| rs1356223   | 2 | 235774940 | G | A | 0.296 | 0.161  | 0.032 | 3.06E-07 | 269188 | AGAP1-IT1 |
| rs1400147   | 2 | 235775059 | G | A | 0.296 | 0.161  | 0.032 | 3.06E-07 | 269307 | AGAP1-IT1 |
| rs2292704   | 2 | 235775848 | C | T | 0.296 | 0.161  | 0.032 | 3.06E-07 | 270096 | AGAP1-IT1 |
| rs2292705   | 2 | 235775902 | C | T | 0.296 | 0.161  | 0.032 | 3.06E-07 | 270150 | AGAP1-IT1 |
| rs12465436  | 2 | 235776372 | C | T | 0.306 | 0.161  | 0.032 | 4.11E-07 | 270620 | AGAP1-IT1 |
| rs12468185  | 2 | 235776373 | C | G | 0.306 | 0.161  | 0.032 | 4.11E-07 | 270621 | AGAP1-IT1 |
| rs12468221  | 2 | 235776470 | C | G | 0.296 | 0.161  | 0.032 | 3.06E-07 | 270718 | AGAP1-IT1 |
| rs72981174  | 2 | 235776777 | A | C | 0.296 | 0.161  | 0.032 | 3.06E-07 | 271025 | AGAP1-IT1 |
| rs72981176  | 2 | 235776888 | A | G | 0.296 | 0.161  | 0.032 | 3.06E-07 | 271136 | AGAP1-IT1 |
| rs113739109 | 2 | 235777087 | C | G | 0.296 | 0.161  | 0.032 | 3.06E-07 | 271335 | AGAP1-IT1 |
| rs138493201 | 2 | 235777118 | G | A | 0.306 | 0.161  | 0.032 | 4.11E-07 | 271366 | AGAP1-IT1 |
| rs12151454  | 2 | 235777185 | C | T | 0.296 | 0.161  | 0.032 | 3.06E-07 | 271433 | AGAP1-IT1 |
| rs72981179  | 2 | 235777749 | T | C | 0.296 | 0.161  | 0.032 | 3.06E-07 | 271997 | AGAP1-IT1 |
| rs55961214  | 2 | 235778520 | A | G | 0.265 | 0.168  | 0.033 | 2.45E-07 | 272768 | AGAP1-IT1 |
| rs61402262  | 2 | 235778549 | T | C | 0.296 | 0.161  | 0.032 | 3.06E-07 | 272797 | AGAP1-IT1 |
| rs12470717  | 2 | 235778877 | A | G | 0.296 | 0.161  | 0.032 | 3.06E-07 | 273125 | AGAP1-IT1 |
| rs12463796  | 2 | 235779111 | T | C | 0.296 | 0.161  | 0.032 | 3.06E-07 | 273359 | AGAP1-IT1 |
| rs13400202  | 2 | 235780146 | G | A | 0.296 | 0.161  | 0.032 | 3.06E-07 | 274394 | AGAP1-IT1 |
| rs12472838  | 2 | 235780401 | A | G | 0.296 | 0.161  | 0.032 | 3.06E-07 | 274649 | AGAP1-IT1 |
| rs12470048  | 2 | 235780439 | G | T | 0.296 | 0.161  | 0.032 | 3.06E-07 | 274687 | AGAP1-IT1 |
| rs60591163  | 2 | 235781589 | C | T | 0.296 | 0.161  | 0.032 | 3.06E-07 | 275837 | AGAP1-IT1 |
| rs72981189  | 2 | 235781867 | A | G | 0.296 | 0.161  | 0.032 | 3.06E-07 | 276115 | AGAP1-IT1 |
| rs963846    | 2 | 235783052 | G | C | 0.684 | -0.150 | 0.031 | 1.69E-06 | 277300 | AGAP1-IT1 |
| rs373964138 | 2 | 235783214 | A | T | 0.296 | 0.161  | 0.032 | 3.06E-07 | 277462 | AGAP1-IT1 |
| rs1878154   | 2 | 235783338 | G | A | 0.296 | 0.161  | 0.032 | 3.06E-07 | 277586 | AGAP1-IT1 |
| rs12466588  | 2 | 235783594 | G | A | 0.296 | 0.161  | 0.032 | 3.06E-07 | 277842 | AGAP1-IT1 |
| rs72981192  | 2 | 235783821 | T | C | 0.296 | 0.161  | 0.032 | 3.06E-07 | 278069 | AGAP1-IT1 |
| rs59832814  | 2 | 235785072 | G | A | 0.296 | 0.161  | 0.032 | 3.06E-07 | 279320 | AGAP1-IT1 |
| rs56009264  | 2 | 235785796 | G | T | 0.296 | 0.161  | 0.032 | 3.06E-07 | 280044 | AGAP1-IT1 |
| rs12469834  | 2 | 235786022 | G | A | 0.296 | 0.161  | 0.032 | 3.06E-07 | 280270 | AGAP1-IT1 |

|             |   |           |   |   |       |        |       |          |         |           |
|-------------|---|-----------|---|---|-------|--------|-------|----------|---------|-----------|
| rs57957542  | 2 | 235786605 | A | G | 0.296 | 0.161  | 0.032 | 3.06E-07 | 280853  | AGAP1-IT1 |
| rs61499079  | 2 | 235786797 | G | C | 0.296 | 0.161  | 0.032 | 3.06E-07 | 281045  | AGAP1-IT1 |
| rs1878155   | 2 | 235787192 | T | G | 0.296 | 0.161  | 0.032 | 3.06E-07 | 281440  | AGAP1-IT1 |
| rs12472982  | 2 | 235788018 | C | T | 0.296 | 0.161  | 0.032 | 3.06E-07 | 282266  | AGAP1-IT1 |
| rs12472150  | 2 | 235788047 | G | A | 0.296 | 0.161  | 0.032 | 3.06E-07 | 282295  | AGAP1-IT1 |
| rs56329604  | 2 | 235788220 | T | C | 0.296 | 0.161  | 0.032 | 3.06E-07 | 282468  | AGAP1-IT1 |
| rs72983003  | 2 | 235788415 | T | G | 0.296 | 0.161  | 0.032 | 3.06E-07 | 282663  | AGAP1-IT1 |
| rs72983005  | 2 | 235788471 | C | T | 0.296 | 0.161  | 0.032 | 3.06E-07 | 282719  | AGAP1-IT1 |
| rs72983007  | 2 | 235788621 | G | T | 0.296 | 0.161  | 0.032 | 3.06E-07 | 282869  | AGAP1-IT1 |
| rs72983009  | 2 | 235788684 | G | A | 0.296 | 0.161  | 0.032 | 3.06E-07 | 282932  | AGAP1-IT1 |
| rs72983012  | 2 | 235788851 | T | C | 0.296 | 0.161  | 0.032 | 3.06E-07 | 283099  | AGAP1-IT1 |
| rs12469161  | 2 | 235789283 | G | C | 0.296 | 0.161  | 0.032 | 3.06E-07 | 283531  | AGAP1-IT1 |
| rs12469185  | 2 | 235789305 | T | C | 0.296 | 0.161  | 0.032 | 3.06E-07 | 283553  | AGAP1-IT1 |
| rs12474276  | 2 | 235789568 | A | T | 0.296 | 0.161  | 0.032 | 3.06E-07 | 283816  | AGAP1-IT1 |
| rs56062711  | 2 | 235789772 | T | G | 0.296 | 0.161  | 0.032 | 3.06E-07 | 284020  | AGAP1-IT1 |
| rs55936237  | 2 | 235789838 | T | C | 0.296 | 0.161  | 0.032 | 3.06E-07 | 284086  | AGAP1-IT1 |
| rs72983019  | 2 | 235790229 | C | T | 0.296 | 0.161  | 0.032 | 3.06E-07 | 284477  | AGAP1-IT1 |
| rs12475524  | 2 | 235790749 | G | T | 0.296 | 0.161  | 0.032 | 3.06E-07 | 284997  | AGAP1-IT1 |
| rs12474606  | 2 | 235790763 | G | A | 0.296 | 0.161  | 0.032 | 3.06E-07 | 285011  | AGAP1-IT1 |
| rs12470496  | 2 | 235790785 | T | C | 0.296 | 0.161  | 0.032 | 3.06E-07 | 285033  | AGAP1-IT1 |
| rs12474630  | 2 | 235790852 | G | A | 0.306 | 0.161  | 0.032 | 4.11E-07 | 285100  | AGAP1-IT1 |
| rs55881123  | 2 | 235790935 | C | T | 0.296 | 0.161  | 0.032 | 3.06E-07 | 285183  | AGAP1-IT1 |
| rs72983030  | 2 | 235791262 | G | A | 0.296 | 0.161  | 0.032 | 3.06E-07 | 285510  | AGAP1-IT1 |
| rs72983032  | 2 | 235791271 | C | T | 0.296 | 0.161  | 0.032 | 3.06E-07 | 285519  | AGAP1-IT1 |
| rs6845244   | 4 | 14785233  | C | A | 0.806 | -0.177 | 0.038 | 2.74E-06 | 102937  | LINC00504 |
| rs4698291   | 4 | 14788174  | G | C | 0.806 | -0.177 | 0.038 | 2.74E-06 | 99996   | LINC00504 |
| rs13151601  | 4 | 27958744  | T | A | 0.724 | 0.170  | 0.038 | 6.30E-06 | 741264  | LINC02261 |
| rs7665009   | 4 | 27960206  | T | C | 0.724 | 0.170  | 0.038 | 6.30E-06 | 742726  | LINC02261 |
| rs7438137   | 4 | 75831883  | T | C | 0.439 | 0.145  | 0.032 | 5.02E-06 | 70689   | PPEF2     |
| rs62326190  | 4 | 155956020 | C | T | 0.194 | 0.176  | 0.038 | 3.24E-06 | 197027  | GUCY1B1   |
| rs4306914   | 4 | 156020957 | G | C | 0.194 | 0.176  | 0.038 | 3.24E-06 | 261964  | GUCY1B1   |
| rs371103786 | 4 | 181401805 | T | C | 0.286 | 0.183  | 0.040 | 4.71E-06 | -242655 | LINC00290 |
| rs4113603   | 4 | 184286837 | C | T | 0.347 | -0.170 | 0.037 | 4.85E-06 | -65606  | ENPP6     |
| rs1217971   | 4 | 184288728 | T | C | 0.622 | 0.180  | 0.038 | 2.63E-06 | 65250   | LINC02363 |
| rs1217972   | 4 | 184288886 | G | T | 0.622 | 0.180  | 0.038 | 2.63E-06 | 65092   | LINC02363 |
| rs6453850   | 6 | 75937483  | A | G | 0.306 | 0.170  | 0.036 | 1.84E-06 | 135196  | IMPG1     |
| rs9341546   | 6 | 75937859  | T | C | 0.653 | -0.157 | 0.033 | 2.49E-06 | 134820  | IMPG1     |
| rs9350607   | 6 | 75937890  | C | T | 0.653 | -0.157 | 0.033 | 2.49E-06 | 134789  | IMPG1     |
| rs9360962   | 6 | 75938923  | G | T | 0.663 | -0.165 | 0.035 | 1.85E-06 | 133756  | IMPG1     |
| rs9343338   | 6 | 75939209  | T | A | 0.663 | -0.165 | 0.035 | 1.85E-06 | 133470  | IMPG1     |
| rs13207399  | 6 | 75939355  | G | C | 0.306 | 0.170  | 0.036 | 1.84E-06 | 133324  | IMPG1     |
| rs2313752   | 6 | 75940342  | C | T | 0.663 | -0.165 | 0.035 | 1.85E-06 | 132337  | IMPG1     |
| rs2313753   | 6 | 75942546  | G | C | 0.663 | -0.165 | 0.035 | 1.85E-06 | 130133  | IMPG1     |
| rs2313755   | 6 | 75943204  | T | C | 0.673 | -0.173 | 0.033 | 2.03E-07 | 129475  | IMPG1     |
| rs1610336   | 6 | 75943378  | A | G | 0.306 | 0.170  | 0.036 | 1.84E-06 | 129301  | IMPG1     |
| rs76014128  | 6 | 78481469  | C | T | 0.163 | 0.209  | 0.044 | 2.46E-06 | -386004 | IRAK1BP1  |
| rs76364903  | 6 | 78482432  | A | G | 0.184 | 0.199  | 0.044 | 5.69E-06 | -385041 | IRAK1BP1  |
| rs11968517  | 6 | 78486543  | C | G | 0.163 | 0.209  | 0.044 | 2.46E-06 | -380930 | IRAK1BP1  |
| rs997648    | 6 | 78488462  | A | G | 0.163 | 0.209  | 0.044 | 2.46E-06 | -379011 | IRAK1BP1  |
| rs78808189  | 6 | 78489069  | A | T | 0.163 | 0.209  | 0.044 | 2.46E-06 | -378404 | IRAK1BP1  |
| rs77972979  | 6 | 78489165  | T | C | 0.163 | 0.209  | 0.044 | 2.46E-06 | -378308 | IRAK1BP1  |
| rs79700878  | 6 | 78489720  | A | G | 0.163 | 0.209  | 0.044 | 2.46E-06 | -377753 | IRAK1BP1  |
| rs1407103   | 6 | 78491257  | A | C | 0.163 | 0.209  | 0.044 | 2.46E-06 | -376216 | IRAK1BP1  |
| rs7773443   | 6 | 78494501  | A | G | 0.163 | 0.209  | 0.044 | 2.46E-06 | -372972 | IRAK1BP1  |
| rs76167616  | 6 | 78494757  | T | C | 0.163 | 0.209  | 0.044 | 2.46E-06 | -372716 | IRAK1BP1  |
| rs76312719  | 6 | 78495068  | C | T | 0.163 | 0.209  | 0.044 | 2.46E-06 | -372405 | IRAK1BP1  |
| rs77974320  | 6 | 78495334  | C | T | 0.163 | 0.209  | 0.044 | 2.46E-06 | -372139 | IRAK1BP1  |

|             |    |           |   |   |       |        |       |          |         |              |
|-------------|----|-----------|---|---|-------|--------|-------|----------|---------|--------------|
| rs148823079 | 6  | 78495409  | C | T | 0.163 | 0.209  | 0.044 | 2.46E-06 | -372064 | IRAK1BP1     |
| rs114251753 | 6  | 78495612  | A | G | 0.163 | 0.209  | 0.044 | 2.46E-06 | -371861 | IRAK1BP1     |
| rs80099930  | 6  | 78495713  | C | T | 0.163 | 0.209  | 0.044 | 2.46E-06 | -371760 | IRAK1BP1     |
| rs115355509 | 6  | 78495767  | G | A | 0.163 | 0.209  | 0.044 | 2.46E-06 | -371706 | IRAK1BP1     |
| rs200194409 | 6  | 78495969  | A | C | 0.163 | 0.209  | 0.044 | 2.46E-06 | -371504 | IRAK1BP1     |
| rs11961883  | 6  | 78496288  | A | G | 0.163 | 0.209  | 0.044 | 2.46E-06 | -371185 | IRAK1BP1     |
| rs7751932   | 6  | 78497915  | A | C | 0.163 | 0.209  | 0.044 | 2.46E-06 | -369558 | IRAK1BP1     |
| rs79949695  | 6  | 78499776  | C | G | 0.163 | 0.209  | 0.044 | 2.46E-06 | -367697 | IRAK1BP1     |
| rs7744184   | 6  | 78501326  | A | G | 0.163 | 0.209  | 0.044 | 2.46E-06 | -366147 | IRAK1BP1     |
| rs79313931  | 6  | 78504256  | A | G | 0.163 | 0.209  | 0.044 | 2.46E-06 | -363217 | IRAK1BP1     |
| rs6900179   | 6  | 78507704  | C | G | 0.163 | 0.209  | 0.044 | 2.46E-06 | -359769 | IRAK1BP1     |
| rs6922709   | 6  | 78507743  | C | T | 0.163 | 0.209  | 0.044 | 2.46E-06 | -359730 | IRAK1BP1     |
| rs1884966   | 6  | 78508721  | A | G | 0.163 | 0.209  | 0.044 | 2.46E-06 | -358752 | IRAK1BP1     |
| rs60520348  | 6  | 78510501  | G | T | 0.163 | 0.209  | 0.044 | 2.46E-06 | -356972 | IRAK1BP1     |
| rs11967020  | 6  | 78514356  | T | C | 0.163 | 0.209  | 0.044 | 2.46E-06 | -353117 | IRAK1BP1     |
| rs1358817   | 6  | 78518080  | A | C | 0.163 | 0.209  | 0.044 | 2.46E-06 | -349393 | IRAK1BP1     |
| rs723437    | 6  | 78521437  | G | A | 0.163 | 0.209  | 0.044 | 2.46E-06 | -346036 | IRAK1BP1     |
| rs9359328   | 6  | 78524372  | A | G | 0.163 | 0.209  | 0.044 | 2.46E-06 | -343101 | IRAK1BP1     |
| rs9343777   | 6  | 78525400  | G | T | 0.163 | 0.209  | 0.044 | 2.46E-06 | -342073 | IRAK1BP1     |
| rs1321597   | 6  | 78527929  | T | C | 0.163 | 0.209  | 0.044 | 2.46E-06 | -339544 | IRAK1BP1     |
| rs76641149  | 6  | 78541449  | A | C | 0.143 | 0.237  | 0.043 | 4.60E-08 | -326024 | IRAK1BP1     |
| rs79747327  | 6  | 78556991  | G | A | 0.133 | 0.221  | 0.046 | 1.88E-06 | -310482 | IRAK1BP1     |
| rs76889818  | 6  | 78566330  | A | G | 0.133 | 0.221  | 0.046 | 1.88E-06 | -301143 | IRAK1BP1     |
| rs77413528  | 6  | 78581094  | G | A | 0.133 | 0.221  | 0.046 | 1.88E-06 | -286379 | IRAK1BP1     |
| rs9359652   | 6  | 85344324  | A | G | 0.418 | 0.151  | 0.034 | 8.55E-06 | 45863   | LINC02535    |
| rs12201128  | 6  | 85353689  | G | T | 0.418 | 0.151  | 0.034 | 8.55E-06 | 36498   | LINC02535    |
| rs11771342  | 7  | 46204239  | T | G | 0.163 | 0.216  | 0.044 | 7.61E-07 | -282364 | IGFBP3       |
| rs9691259   | 7  | 46206982  | G | A | 0.163 | 0.216  | 0.044 | 7.61E-07 | -285107 | IGFBP3       |
| rs2633359   | 7  | 138122716 | C | T | 0.888 | -0.250 | 0.055 | 4.64E-06 | -1043   | MIR4468      |
| rs2440798   | 7  | 138127010 | T | C | 0.888 | -0.250 | 0.055 | 4.64E-06 | 3251    | MIR4468      |
| rs4368897   | 7  | 146986807 | T | C | 0.153 | 0.205  | 0.046 | 6.51E-06 | 110803  | CNTNAP2-AS1  |
| rs12682543  | 8  | 29222041  | A | G | 0.643 | -0.153 | 0.034 | 8.36E-06 | 41084   | KIF13B       |
| rs13263888  | 8  | 29223321  | C | G | 0.643 | -0.153 | 0.034 | 8.36E-06 | 39804   | KIF13B       |
| rs4585791   | 9  | 614530    | A | T | 0.235 | -0.197 | 0.042 | 2.68E-06 | 144238  | KANK1        |
| rs11812737  | 10 | 62669559  | A | G | 0.173 | 0.200  | 0.040 | 5.15E-07 | -135299 | ADO          |
| rs4746518   | 10 | 62669835  | G | A | 0.214 | 0.171  | 0.038 | 6.35E-06 | -135023 | ADO          |
| rs729738    | 10 | 62670505  | A | C | 0.214 | 0.171  | 0.038 | 6.35E-06 | -134353 | ADO          |
| rs729739    | 10 | 62670542  | A | G | 0.214 | 0.171  | 0.038 | 6.35E-06 | -134316 | ADO          |
| rs7394165   | 10 | 62677258  | T | C | 0.173 | 0.200  | 0.040 | 5.15E-07 | -127600 | ADO          |
| rs7393302   | 10 | 62677294  | G | T | 0.214 | 0.171  | 0.038 | 6.35E-06 | -127564 | ADO          |
| rs4746524   | 10 | 62678037  | T | C | 0.173 | 0.200  | 0.040 | 5.15E-07 | -126821 | ADO          |
| rs224121    | 10 | 62687592  | C | A | 0.827 | -0.216 | 0.043 | 3.96E-07 | -117266 | ADO          |
| rs2960666   | 10 | 115819198 | G | A | 0.673 | -0.156 | 0.035 | 8.81E-06 | 454270  | GFRA1        |
| rs372086626 | 11 | 39730859  | C | T | 0.173 | 0.208  | 0.044 | 1.73E-06 | 1082000 | LINC01493    |
| rs11063601  | 12 | 562434    | G | T | 0.112 | 0.248  | 0.055 | 6.25E-06 | 24053   | LOC105369595 |
| rs3217810   | 12 | 4279105   | T | C | 0.153 | 0.205  | 0.046 | 6.45E-06 | -2920   | CCND2-AS1    |
| rs2075267   | 12 | 14962167  | G | T | 0.612 | -0.150 | 0.032 | 2.84E-06 | -438    | ARHGDI8      |
| rs11056258  | 12 | 14964465  | T | G | 0.592 | -0.156 | 0.033 | 1.70E-06 | -2736   | ARHGDI8      |
| rs7311989   | 12 | 14964603  | A | C | 0.592 | -0.156 | 0.033 | 1.70E-06 | -2874   | ARHGDI8      |
| rs7300467   | 12 | 14964663  | G | T | 0.602 | -0.148 | 0.033 | 6.58E-06 | -2934   | ARHGDI8      |
| rs10846097  | 12 | 14970137  | T | C | 0.643 | -0.161 | 0.036 | 7.28E-06 | -2886   | PDE6H        |
| rs7978415   | 12 | 14970534  | A | G | 0.592 | -0.156 | 0.033 | 1.70E-06 | -2489   | PDE6H        |
| rs3983696   | 12 | 14970938  | T | C | 0.592 | -0.156 | 0.033 | 1.70E-06 | -2085   | PDE6H        |
| rs7313555   | 12 | 14988129  | C | T | 0.663 | -0.158 | 0.035 | 8.00E-06 | -13705  | LINC01489    |
| rs11058862  | 12 | 122592803 | T | C | 0.398 | 0.141  | 0.032 | 7.77E-06 | 65556   | KNCT1        |
| rs11611668  | 12 | 122609181 | T | C | 0.398 | 0.143  | 0.031 | 4.87E-06 | 81934   | KNCT1        |
| rs61947369  | 13 | 25920538  | A | G | 0.163 | 0.186  | 0.042 | 9.46E-06 | 130494  | SHISA2       |

|            |    |          |   |   |       |        |       |          |         |           |
|------------|----|----------|---|---|-------|--------|-------|----------|---------|-----------|
| rs9548368  | 13 | 38482144 | T | C | 0.367 | 0.151  | 0.033 | 4.62E-06 | 63156   | LINC00437 |
| rs9532237  | 13 | 38482716 | A | G | 0.367 | 0.151  | 0.033 | 4.62E-06 | 62584   | LINC00437 |
| rs6571996  | 14 | 40299024 | A | C | 0.745 | -0.184 | 0.036 | 3.61E-07 | -655875 | LINC02315 |
| rs7160617  | 14 | 40326534 | G | A | 0.806 | -0.217 | 0.047 | 3.19E-06 | -628365 | LINC02315 |
| rs6494413  | 15 | 63564443 | A | G | 0.755 | -0.161 | 0.036 | 6.55E-06 | -32911  | FBXL22    |
| rs72625754 | 15 | 63564562 | C | T | 0.173 | 0.207  | 0.039 | 1.20E-07 | -32792  | FBXL22    |
| rs6494414  | 15 | 63566507 | G | A | 0.755 | -0.161 | 0.036 | 6.55E-06 | -30847  | FBXL22    |
| rs6494415  | 15 | 63570130 | T | G | 0.755 | -0.161 | 0.036 | 6.55E-06 | -27224  | FBXL22    |
| rs8028681  | 15 | 63572006 | T | C | 0.755 | -0.161 | 0.036 | 6.55E-06 | -25348  | FBXL22    |
| rs8029310  | 15 | 63572221 | T | G | 0.755 | -0.161 | 0.036 | 6.55E-06 | -25133  | FBXL22    |
| rs7183892  | 15 | 63586733 | T | C | 0.755 | -0.161 | 0.036 | 6.55E-06 | -10621  | FBXL22    |
| rs7168622  | 15 | 63668675 | A | C | 0.122 | 0.230  | 0.047 | 9.81E-07 | -67085  | USP3-AS1  |
| rs7182375  | 15 | 63813431 | G | A | 0.776 | -0.163 | 0.036 | 4.85E-06 | 20512   | HERC1     |
| rs7170689  | 15 | 63831046 | T | C | 0.776 | -0.159 | 0.036 | 9.59E-06 | 2897    | HERC1     |
| rs8042418  | 15 | 63832686 | A | G | 0.776 | -0.159 | 0.036 | 9.59E-06 | 1257    | HERC1     |
| rs7170433  | 15 | 63837452 | C | T | 0.776 | -0.159 | 0.036 | 9.59E-06 | -3509   | HERC1     |
| rs214239   | 16 | 303625   | A | G | 0.214 | 0.182  | 0.040 | 5.50E-06 | 20472   | PDIA2     |
| rs1558346  | 16 | 6514333  | T | C | 0.143 | 0.208  | 0.046 | 7.22E-06 | 881865  | MIR8065   |
| rs72804582 | 16 | 86720970 | G | A | 0.112 | 0.246  | 0.055 | 8.44E-06 | 985     | LINC02189 |
| rs11659939 | 18 | 33845019 | A | G | 0.214 | 0.179  | 0.040 | 9.37E-06 | 266403  | ASXL3     |
| rs1051651  | 19 | 7116272  | C | G | 0.245 | 0.166  | 0.035 | 2.23E-06 | 46827   | ZNF557    |
| rs11670340 | 19 | 7436914  | A | G | 0.408 | 0.138  | 0.031 | 7.47E-06 | 54079   | ARHGEF18  |
| rs6139617  | 20 | 5063227  | G | A | 0.469 | -0.143 | 0.031 | 2.93E-06 | 49877   | TMEM230   |

**Table S6.** Annotation of variants associated with GO\_ATP\_METABOLIC level with p-val<10<sup>-5</sup>.

| rsID       | CHR | POS       | A1 | A2 | AF1   | BETA   | SE    | P        | distancetoFeature | symbol    |
|------------|-----|-----------|----|----|-------|--------|-------|----------|-------------------|-----------|
| rs4649064  | 1   | 25094616  | G  | A  | 0.456 | 0.232  | 0.045 | 2.07E-07 | 71112             | RUNX1     |
| rs6657249  | 1   | 25095126  | C  | A  | 0.395 | 0.250  | 0.044 | 1.65E-08 | 71622             | RUNX1     |
| rs11588172 | 1   | 25095499  | C  | T  | 0.395 | 0.250  | 0.044 | 1.65E-08 | 71995             | RUNX1     |
| rs56365408 | 1   | 25096844  | G  | A  | 0.395 | 0.250  | 0.044 | 1.65E-08 | 73340             | RUNX1     |
| rs56348607 | 1   | 25097067  | G  | A  | 0.412 | 0.258  | 0.045 | 1.23E-08 | 73563             | RUNX1     |
| rs58693652 | 1   | 25097185  | A  | G  | 0.395 | 0.250  | 0.044 | 1.65E-08 | 73681             | RUNX1     |
| rs2536363  | 1   | 83382963  | C  | T  | 0.728 | -0.254 | 0.056 | 6.46E-06 | -396754           | LINC01361 |
| rs2536361  | 1   | 83383171  | T  | G  | 0.728 | -0.254 | 0.056 | 6.46E-06 | -396962           | LINC01361 |
| N.A        | 1   | 121043250 | C  | G  | 0.728 | -0.201 | 0.041 | 1.25E-06 | -44096            | FCGR1B    |
| rs12471349 | 2   | 231630391 | A  | C  | 0.456 | -0.203 | 0.043 | 2.12E-06 | 37489             | TEX44     |
| rs11686124 | 2   | 231631051 | A  | G  | 0.447 | -0.200 | 0.042 | 2.28E-06 | 38149             | TEX44     |
| rs12619551 | 2   | 231632587 | T  | C  | 0.447 | -0.200 | 0.042 | 2.28E-06 | 39685             | TEX44     |
| rs12621259 | 2   | 231633982 | T  | C  | 0.447 | -0.200 | 0.042 | 2.28E-06 | 41080             | TEX44     |
| rs10204481 | 2   | 231635421 | T  | C  | 0.456 | -0.203 | 0.043 | 2.12E-06 | 42519             | TEX44     |
| rs10204963 | 2   | 231635773 | A  | G  | 0.456 | -0.203 | 0.043 | 2.12E-06 | 42871             | TEX44     |
| rs11685588 | 2   | 231635997 | A  | C  | 0.456 | -0.203 | 0.043 | 2.12E-06 | 43095             | TEX44     |
| rs931390   | 3   | 4736178   | T  | C  | 0.746 | -0.269 | 0.051 | 1.26E-07 | 15413             | EGOT      |
| rs4690284  | 4   | 73616     | C  | T  | 0.105 | 0.315  | 0.071 | 9.38E-06 | 20330             | ZNF595    |
| rs11735004 | 4   | 8519493   | A  | G  | 0.105 | 0.359  | 0.077 | 3.52E-06 | -58833            | CPZ       |
| rs28520722 | 4   | 168372678 | C  | G  | 0.158 | 0.261  | 0.055 | 2.56E-06 | -53870            | DDX60     |
| rs10474554 | 5   | 78503335  | T  | C  | 0.816 | -0.256 | 0.054 | 2.01E-06 | 142751            | SCAMP1    |
| rs10474555 | 5   | 78503370  | T  | C  | 0.816 | -0.256 | 0.054 | 2.01E-06 | 142786            | SCAMP1    |
| rs12522528 | 5   | 172824478 | C  | A  | 0.272 | 0.247  | 0.049 | 5.68E-07 | -9798             | ERGIC1    |
| rs6891132  | 5   | 172824828 | G  | A  | 0.711 | -0.224 | 0.049 | 4.38E-06 | -9448             | ERGIC1    |
| rs4867689  | 5   | 172825091 | C  | T  | 0.711 | -0.224 | 0.049 | 4.38E-06 | -9185             | ERGIC1    |
| rs4867690  | 5   | 172825370 | G  | A  | 0.711 | -0.224 | 0.049 | 4.38E-06 | -8906             | ERGIC1    |
| rs4868216  | 5   | 172825449 | A  | G  | 0.711 | -0.224 | 0.049 | 4.38E-06 | -8827             | ERGIC1    |
| rs4867691  | 5   | 172825540 | G  | C  | 0.711 | -0.224 | 0.049 | 4.38E-06 | -8736             | ERGIC1    |
| rs7717831  | 5   | 172825774 | C  | T  | 0.711 | -0.224 | 0.049 | 4.38E-06 | -8502             | ERGIC1    |
| rs7717986  | 5   | 172825824 | A  | T  | 0.711 | -0.224 | 0.049 | 4.38E-06 | -8452             | ERGIC1    |
| rs7736149  | 5   | 172825871 | A  | G  | 0.711 | -0.224 | 0.049 | 4.38E-06 | -8405             | ERGIC1    |
| rs7736270  | 5   | 172825917 | A  | G  | 0.711 | -0.224 | 0.049 | 4.38E-06 | -8359             | ERGIC1    |
| rs792994   | 5   | 172826179 | T  | C  | 0.272 | 0.247  | 0.049 | 5.68E-07 | -8097             | ERGIC1    |
| rs11748400 | 5   | 172826590 | G  | T  | 0.263 | 0.255  | 0.049 | 1.53E-07 | -7686             | ERGIC1    |
| rs4868217  | 5   | 172826780 | C  | T  | 0.711 | -0.224 | 0.049 | 4.38E-06 | -7496             | ERGIC1    |
| rs12519115 | 5   | 172827357 | T  | C  | 0.254 | 0.259  | 0.048 | 7.76E-08 | -6919             | ERGIC1    |
| rs7707991  | 5   | 172827470 | G  | A  | 0.711 | -0.224 | 0.049 | 4.38E-06 | -6806             | ERGIC1    |
| rs6556047  | 5   | 172828846 | A  | T  | 0.702 | -0.211 | 0.047 | 8.90E-06 | -5430             | ERGIC1    |
| rs1564259  | 5   | 172829021 | C  | T  | 0.702 | -0.211 | 0.047 | 8.90E-06 | -5255             | ERGIC1    |
| rs1006721  | 5   | 172829068 | A  | G  | 0.702 | -0.211 | 0.047 | 8.90E-06 | -5208             | ERGIC1    |
| rs10057822 | 5   | 172829748 | G  | A  | 0.702 | -0.211 | 0.047 | 8.90E-06 | -4528             | ERGIC1    |
| rs2339652  | 5   | 172830696 | G  | A  | 0.702 | -0.211 | 0.047 | 8.90E-06 | -3580             | ERGIC1    |
| rs4868218  | 5   | 172830968 | A  | C  | 0.702 | -0.211 | 0.047 | 8.90E-06 | -3308             | ERGIC1    |
| rs35566639 | 5   | 172834459 | A  | G  | 0.254 | 0.250  | 0.049 | 3.70E-07 | 183               | ERGIC1    |
| rs35768025 | 5   | 172834486 | A  | C  | 0.254 | 0.250  | 0.049 | 3.70E-07 | 210               | ERGIC1    |
| rs78078909 | 5   | 172834535 | A  | C  | 0.254 | 0.250  | 0.049 | 3.70E-07 | 259               | ERGIC1    |
| rs793010   | 5   | 172835670 | T  | C  | 0.263 | 0.241  | 0.050 | 1.31E-06 | 1394              | ERGIC1    |
| rs6895746  | 5   | 172838337 | G  | A  | 0.254 | 0.263  | 0.048 | 3.69E-08 | 4061              | ERGIC1    |
| rs11134762 | 5   | 172838397 | A  | G  | 0.237 | 0.267  | 0.047 | 1.87E-08 | 4121              | ERGIC1    |

|             |    |           |   |   |       |       |       |          |         |              |
|-------------|----|-----------|---|---|-------|-------|-------|----------|---------|--------------|
| rs11949146  | 5  | 172840207 | A | G | 0.219 | 0.282 | 0.050 | 1.54E-08 | 5931    | ERGIC1       |
| rs6877332   | 5  | 172841627 | A | G | 0.246 | 0.267 | 0.051 | 1.61E-07 | 7351    | ERGIC1       |
| rs7722970   | 5  | 172842868 | T | G | 0.219 | 0.258 | 0.052 | 8.18E-07 | 8592    | ERGIC1       |
| rs10945708  | 6  | 161017963 | T | C | 0.298 | 0.227 | 0.049 | 3.32E-06 | 26235   | MAP3K4       |
| rs12195182  | 6  | 161108526 | C | G | 0.465 | 0.195 | 0.042 | 4.49E-06 | 53457   | AGPAT4-IT1   |
| rs2314157   | 6  | 161190126 | C | G | 0.439 | 0.194 | 0.042 | 3.99E-06 | -28143  | AGPAT4-IT1   |
| rs3735487   | 7  | 45065547  | G | A | 0.114 | 0.274 | 0.060 | 4.18E-06 | 23368   | NACAD        |
| rs2140953   | 7  | 106848675 | C | A | 0.105 | 0.354 | 0.078 | 5.32E-06 | -16604  | PIK3CG       |
| rs7791674   | 7  | 106849681 | T | C | 0.105 | 0.354 | 0.078 | 5.32E-06 | -15598  | PIK3CG       |
| rs35031873  | 7  | 142758607 | C | A | 0.079 | 0.385 | 0.074 | 2.17E-07 | -373471 | PIP          |
| rs1567924   | 8  | 19201161  | G | C | 0.237 | 0.244 | 0.053 | 4.21E-06 | 58309   | LOC100128993 |
| rs62524263  | 8  | 102126785 | G | C | 0.649 | 0.214 | 0.047 | 5.51E-06 | 1352    | MIR5680      |
| rs6982041   | 8  | 102127205 | C | A | 0.649 | 0.214 | 0.047 | 5.51E-06 | 1772    | MIR5680      |
| rs7819114   | 8  | 102128424 | T | C | 0.649 | 0.214 | 0.047 | 5.51E-06 | 2991    | MIR5680      |
| rs4734053   | 8  | 102129163 | A | G | 0.649 | 0.214 | 0.047 | 5.51E-06 | 3730    | MIR5680      |
| rs4734616   | 8  | 102129293 | T | C | 0.658 | 0.215 | 0.046 | 3.56E-06 | 3860    | MIR5680      |
| rs7826028   | 8  | 102131357 | C | T | 0.649 | 0.214 | 0.047 | 5.51E-06 | 5924    | MIR5680      |
| rs7000087   | 8  | 102131841 | G | T | 0.640 | 0.218 | 0.047 | 3.59E-06 | 6408    | MIR5680      |
| rs9942801   | 8  | 102132950 | G | A | 0.649 | 0.214 | 0.047 | 5.51E-06 | 7517    | MIR5680      |
| rs4734617   | 8  | 102138783 | C | A | 0.649 | 0.214 | 0.047 | 5.51E-06 | 13350   | MIR5680      |
| rs13248776  | 8  | 102145359 | T | C | 0.649 | 0.214 | 0.047 | 5.51E-06 | 19926   | MIR5680      |
| rs13250882  | 8  | 102145366 | C | T | 0.649 | 0.214 | 0.047 | 5.51E-06 | 19933   | MIR5680      |
| rs6988832   | 8  | 102146011 | G | A | 0.649 | 0.214 | 0.047 | 5.51E-06 | 20578   | MIR5680      |
| rs2105616   | 8  | 102146140 | C | A | 0.649 | 0.214 | 0.047 | 5.51E-06 | 20707   | MIR5680      |
| rs372431986 | 8  | 102146141 | C | A | 0.649 | 0.214 | 0.047 | 5.51E-06 | 20708   | MIR5680      |
| rs1892965   | 8  | 102146620 | A | C | 0.649 | 0.214 | 0.047 | 5.51E-06 | 21187   | MIR5680      |
| rs13268773  | 8  | 102147224 | A | G | 0.649 | 0.214 | 0.047 | 5.51E-06 | 21791   | MIR5680      |
| rs6468817   | 8  | 102148609 | A | T | 0.649 | 0.214 | 0.047 | 5.51E-06 | 23176   | MIR5680      |
| rs12681037  | 8  | 102149097 | A | T | 0.649 | 0.214 | 0.047 | 5.51E-06 | 23664   | MIR5680      |
| rs6468818   | 8  | 102149937 | G | C | 0.649 | 0.214 | 0.047 | 5.51E-06 | 24504   | MIR5680      |
| rs4291239   | 8  | 102150410 | A | G | 0.649 | 0.214 | 0.047 | 5.51E-06 | 24977   | MIR5680      |
| rs10093024  | 8  | 102151656 | C | T | 0.649 | 0.214 | 0.047 | 5.51E-06 | 26223   | MIR5680      |
| rs6992948   | 8  | 102152160 | A | C | 0.596 | 0.220 | 0.045 | 1.27E-06 | 26727   | MIR5680      |
| rs1111911   | 8  | 102152888 | T | A | 0.649 | 0.214 | 0.047 | 5.51E-06 | 27455   | MIR5680      |
| rs6980613   | 8  | 102153223 | G | T | 0.649 | 0.214 | 0.047 | 5.51E-06 | 27790   | MIR5680      |
| rs1573311   | 8  | 102154787 | T | C | 0.649 | 0.214 | 0.047 | 5.51E-06 | 29354   | MIR5680      |
| rs2387095   | 8  | 102155415 | G | T | 0.649 | 0.214 | 0.047 | 5.51E-06 | 29982   | MIR5680      |
| rs1547370   | 8  | 102155949 | T | C | 0.649 | 0.214 | 0.047 | 5.51E-06 | 30516   | MIR5680      |
| rs2186682   | 8  | 102157973 | G | A | 0.649 | 0.214 | 0.047 | 5.51E-06 | 32540   | MIR5680      |
| rs1573309   | 8  | 102160658 | G | A | 0.605 | 0.234 | 0.049 | 1.48E-06 | 35225   | MIR5680      |
| rs1148514   | 8  | 102168709 | C | G | 0.605 | 0.234 | 0.049 | 1.48E-06 | 43276   | MIR5680      |
| rs1148515   | 8  | 102168828 | G | C | 0.605 | 0.234 | 0.049 | 1.48E-06 | 43395   | MIR5680      |
| rs1148516   | 8  | 102168999 | G | A | 0.605 | 0.234 | 0.049 | 1.48E-06 | 43566   | MIR5680      |
| rs78848775  | 8  | 133734878 | T | A | 0.105 | 0.319 | 0.071 | 6.46E-06 | 42475   | LOC101927798 |
| rs77131790  | 8  | 133735142 | G | A | 0.105 | 0.319 | 0.071 | 6.46E-06 | 42211   | LOC101927798 |
| rs75149129  | 8  | 133735347 | G | T | 0.105 | 0.319 | 0.071 | 6.46E-06 | 42006   | LOC101927798 |
| rs76106243  | 8  | 133737227 | C | T | 0.105 | 0.319 | 0.071 | 6.46E-06 | 40126   | LOC101927798 |
| rs17820827  | 9  | 13863723  | G | C | 0.167 | 0.286 | 0.062 | 4.62E-06 | -64249  | LINC00583    |
| rs7858214   | 9  | 13865261  | T | C | 0.105 | 0.327 | 0.070 | 3.09E-06 | -62711  | LINC00583    |
| rs11259468  | 10 | 15081387  | C | G | 0.114 | 0.308 | 0.069 | 9.07E-06 | 7390    | ACBD7        |

|             |    |           |   |   |       |        |       |          |         |           |
|-------------|----|-----------|---|---|-------|--------|-------|----------|---------|-----------|
| rs10901547  | 10 | 126174101 | T | C | 0.281 | 0.236  | 0.048 | 7.53E-07 | -200974 | FANK1-AS1 |
| rs72826371  | 10 | 126177069 | T | C | 0.237 | 0.256  | 0.049 | 1.45E-07 | -203942 | FANK1-AS1 |
| rs12356272  | 10 | 126177590 | G | A | 0.272 | 0.242  | 0.047 | 2.49E-07 | -204463 | FANK1-AS1 |
| rs12357824  | 10 | 126180060 | C | T | 0.272 | 0.242  | 0.047 | 2.49E-07 | -206933 | FANK1-AS1 |
| rs12766940  | 10 | 126180562 | C | T | 0.272 | 0.242  | 0.047 | 2.49E-07 | -207435 | FANK1-AS1 |
| rs11244871  | 10 | 126183597 | A | G | 0.263 | 0.249  | 0.046 | 6.57E-08 | 204859  | ADAM12    |
| rs1459709   | 10 | 126184259 | A | G | 0.263 | 0.249  | 0.046 | 6.57E-08 | 204197  | ADAM12    |
| rs17683203  | 10 | 126186844 | A | G | 0.263 | 0.249  | 0.046 | 6.57E-08 | 201612  | ADAM12    |
| rs17745507  | 10 | 126187170 | T | A | 0.228 | 0.265  | 0.048 | 2.93E-08 | 201286  | ADAM12    |
| rs10829685  | 10 | 130058387 | T | G | 0.228 | 0.259  | 0.052 | 6.16E-07 | 52431   | C10orf143 |
| rs7082237   | 10 | 130091533 | T | C | 0.140 | 0.272  | 0.061 | 8.76E-06 | 19285   | C10orf143 |
| rs1945331   | 11 | 21242296  | T | C | 0.123 | 0.304  | 0.068 | 7.66E-06 | 572744  | NELL1     |
| rs4755920   | 11 | 44947205  | A | G | 0.360 | -0.214 | 0.048 | 6.66E-06 | 4102    | TP53I11   |
| rs141434045 | 12 | 115147278 | G | A | 0.123 | 0.352  | 0.072 | 1.08E-06 | -463113 | TBX5-TBX3 |
| rs10082870  | 12 | 115148523 | C | G | 0.123 | 0.352  | 0.072 | 1.08E-06 | -464358 | TBX5-TBX3 |
| rs2270458   | 12 | 115151267 | T | C | 0.114 | 0.364  | 0.074 | 8.36E-07 | -467102 | TBX5-TBX3 |
| rs12310526  | 12 | 115151871 | A | G | 0.114 | 0.364  | 0.074 | 8.36E-07 | -467706 | TBX5-TBX3 |
| rs112088312 | 12 | 115154065 | T | C | 0.114 | 0.364  | 0.074 | 8.36E-07 | -469900 | TBX5-TBX3 |
| rs11067442  | 12 | 115154219 | T | C | 0.114 | 0.364  | 0.074 | 8.36E-07 | -470054 | TBX5-TBX3 |
| rs74846266  | 12 | 115154979 | T | C | 0.114 | 0.364  | 0.074 | 8.36E-07 | -470814 | TBX5-TBX3 |
| rs7970502   | 12 | 115155723 | T | C | 0.114 | 0.364  | 0.074 | 8.36E-07 | -471558 | TBX5-TBX3 |
| rs7145901   | 14 | 52220916  | T | C | 0.228 | 0.251  | 0.057 | 9.57E-06 | -46798  | PTGDR     |
| rs71474496  | 15 | 42625943  | G | A | 0.123 | 0.318  | 0.067 | 1.90E-06 | 50283   | STARD9    |
| rs11638835  | 15 | 42626143  | G | A | 0.868 | -0.301 | 0.066 | 5.41E-06 | 50483   | STARD9    |
| rs12911585  | 15 | 42642347  | C | T | 0.132 | 0.306  | 0.066 | 3.31E-06 | 66687   | STARD9    |
| rs61122145  | 15 | 42699689  | A | G | 0.149 | 0.306  | 0.063 | 1.12E-06 | 37438   | CDAN1     |
| rs12902830  | 15 | 42705184  | T | C | 0.140 | 0.320  | 0.063 | 3.93E-07 | 31943   | CDAN1     |
| rs35392023  | 15 | 42709462  | A | G | 0.149 | 0.311  | 0.062 | 6.02E-07 | 27665   | CDAN1     |
| rs1058846   | 15 | 42719826  | T | C | 0.149 | 0.311  | 0.062 | 6.02E-07 | 17301   | CDAN1     |
| rs17774047  | 15 | 42721028  | T | C | 0.149 | 0.311  | 0.062 | 6.02E-07 | 16099   | CDAN1     |
| rs35088691  | 15 | 42772565  | C | T | 0.140 | 0.328  | 0.062 | 1.39E-07 | -35438  | CDAN1     |
| rs12913618  | 15 | 42779131  | T | C | 0.140 | 0.328  | 0.062 | 1.39E-07 | -42004  | CDAN1     |
| rs12915116  | 15 | 42782482  | T | C | 0.140 | 0.328  | 0.062 | 1.39E-07 | -45355  | CDAN1     |
| rs35298309  | 15 | 42784803  | C | T | 0.149 | 0.337  | 0.060 | 1.86E-08 | -47676  | CDAN1     |
| rs12908349  | 15 | 42794029  | T | C | 0.123 | 0.315  | 0.067 | 2.59E-06 | -56902  | CDAN1     |
| rs66932813  | 15 | 42796424  | G | T | 0.123 | 0.315  | 0.067 | 2.59E-06 | -59297  | CDAN1     |
| rs36092914  | 15 | 42808425  | A | C | 0.123 | 0.315  | 0.067 | 2.59E-06 | -71298  | CDAN1     |
| rs964776412 | 15 | 42817281  | A | T | 0.123 | 0.315  | 0.067 | 2.59E-06 | -80154  | CDAN1     |
| rs72713784  | 15 | 42823738  | G | A | 0.123 | 0.315  | 0.067 | 2.59E-06 | -86611  | CDAN1     |
| rs34745458  | 15 | 42845003  | C | T | 0.123 | 0.315  | 0.067 | 2.59E-06 | 75807   | TTBK2     |
| rs72713795  | 15 | 42849430  | A | T | 0.123 | 0.315  | 0.067 | 2.59E-06 | 71380   | TTBK2     |
| rs35202249  | 15 | 42855844  | T | C | 0.123 | 0.315  | 0.067 | 2.59E-06 | 64966   | TTBK2     |
| rs2683240   | 15 | 81120333  | T | C | 0.675 | -0.209 | 0.046 | 5.84E-06 | -62268  | IL16      |
| rs2460852   | 15 | 81123862  | T | G | 0.675 | -0.209 | 0.046 | 5.84E-06 | -58739  | IL16      |
| rs2683249   | 15 | 81129249  | G | A | 0.675 | -0.209 | 0.046 | 5.84E-06 | -53352  | IL16      |
| rs2683255   | 15 | 81134198  | C | G | 0.675 | -0.209 | 0.046 | 5.84E-06 | -48403  | IL16      |
| rs2683256   | 15 | 81135816  | A | G | 0.675 | -0.209 | 0.046 | 5.84E-06 | -46785  | IL16      |
| rs4404021   | 15 | 96060577  | T | C | 0.228 | 0.227  | 0.048 | 2.70E-06 | -265362 | NR2F2     |
| rs7166802   | 15 | 96062205  | T | G | 0.237 | 0.219  | 0.049 | 7.62E-06 | -263734 | NR2F2     |
| rs7166314   | 15 | 96062218  | G | A | 0.237 | 0.219  | 0.049 | 7.62E-06 | -263721 | NR2F2     |



|            |    |          |   |   |       |        |       |          |         |              |
|------------|----|----------|---|---|-------|--------|-------|----------|---------|--------------|
| rs79651776 | 16 | 11650396 | G | A | 0.140 | 0.273  | 0.061 | 7.50E-06 | -14014  | LITAF        |
| rs8056041  | 16 | 83121479 | A | G | 0.263 | 0.240  | 0.053 | 6.68E-06 | -131180 | LOC101928417 |
| rs8082569  | 17 | 62828928 | G | A | 0.491 | 0.198  | 0.045 | 9.81E-06 | -20583  | MARCHF10     |
| rs12948372 | 17 | 62831387 | A | G | 0.412 | 0.211  | 0.047 | 6.96E-06 | -23042  | MARCHF10     |
| rs35594211 | 17 | 62831620 | G | A | 0.412 | 0.211  | 0.047 | 6.96E-06 | -23275  | MARCHF10     |
| rs11868614 | 17 | 62831835 | A | G | 0.412 | 0.211  | 0.047 | 6.96E-06 | -23490  | MARCHF10     |
| rs35354702 | 17 | 62832130 | G | A | 0.412 | 0.211  | 0.047 | 6.96E-06 | -23785  | MARCHF10     |
| rs35596881 | 17 | 62834618 | G | A | 0.412 | 0.211  | 0.047 | 6.96E-06 | -26273  | MARCHF10     |
| rs8182298  | 17 | 62837616 | C | T | 0.439 | 0.208  | 0.043 | 1.08E-06 | -29271  | MARCHF10     |
| rs8182316  | 17 | 62837746 | T | C | 0.456 | 0.207  | 0.042 | 1.13E-06 | -29401  | MARCHF10     |
| rs8076190  | 17 | 62837908 | G | A | 0.456 | 0.207  | 0.042 | 1.13E-06 | -29563  | MARCHF10     |
| rs8077260  | 17 | 62838375 | C | G | 0.456 | 0.207  | 0.042 | 1.13E-06 | -30030  | MARCHF10     |
| rs8182324  | 17 | 62838599 | G | A | 0.456 | 0.207  | 0.042 | 1.13E-06 | -30254  | MARCHF10     |
| rs6504130  | 17 | 62838901 | T | C | 0.421 | 0.215  | 0.043 | 4.92E-07 | -30556  | MARCHF10     |
| rs8064710  | 17 | 62839334 | C | T | 0.439 | 0.208  | 0.043 | 1.08E-06 | -30989  | MARCHF10     |
| rs8064402  | 17 | 62839705 | A | G | 0.439 | 0.208  | 0.043 | 1.08E-06 | -31360  | MARCHF10     |
| rs8067960  | 17 | 62839798 | T | C | 0.439 | 0.208  | 0.043 | 1.08E-06 | -31453  | MARCHF10     |
| rs7226368  | 17 | 62840771 | C | G | 0.421 | 0.215  | 0.043 | 4.92E-07 | -32426  | MARCHF10     |
| rs12943672 | 17 | 62841241 | A | T | 0.439 | 0.208  | 0.043 | 1.08E-06 | -32896  | MARCHF10     |
| rs1476811  | 17 | 62841947 | T | C | 0.421 | 0.215  | 0.043 | 4.92E-07 | -33602  | MARCHF10     |
| rs1476812  | 17 | 62842115 | T | C | 0.421 | 0.215  | 0.043 | 4.92E-07 | -33770  | MARCHF10     |
| rs1987647  | 17 | 62842528 | C | T | 0.377 | 0.216  | 0.046 | 2.90E-06 | -34183  | MARCHF10     |
| rs12943559 | 17 | 62843136 | T | C | 0.421 | 0.215  | 0.043 | 4.92E-07 | -34791  | MARCHF10     |
| rs9903891  | 17 | 62843788 | A | T | 0.447 | 0.213  | 0.043 | 8.16E-07 | -35443  | MARCHF10     |
| rs12936567 | 17 | 62844192 | A | G | 0.447 | 0.213  | 0.043 | 8.16E-07 | -35847  | MARCHF10     |
| rs11871628 | 17 | 62844788 | C | T | 0.447 | 0.213  | 0.043 | 8.16E-07 | -36443  | MARCHF10     |
| rs35395730 | 17 | 62845085 | C | A | 0.447 | 0.213  | 0.043 | 8.16E-07 | -36740  | MARCHF10     |
| rs55895685 | 17 | 62846360 | C | G | 0.439 | 0.214  | 0.044 | 1.50E-06 | -38015  | MARCHF10     |
| rs55854611 | 17 | 62846443 | G | T | 0.439 | 0.214  | 0.044 | 1.50E-06 | -38098  | MARCHF10     |
| rs55909719 | 17 | 62846445 | A | G | 0.404 | 0.210  | 0.044 | 1.85E-06 | -38100  | MARCHF10     |
| rs8072675  | 17 | 62846458 | G | A | 0.439 | 0.214  | 0.044 | 1.50E-06 | -38113  | MARCHF10     |
| rs34350332 | 17 | 62847043 | C | T | 0.439 | 0.214  | 0.044 | 1.50E-06 | -38698  | MARCHF10     |
| rs34826284 | 17 | 62847771 | T | C | 0.404 | 0.230  | 0.044 | 2.15E-07 | -39426  | MARCHF10     |
| rs35290531 | 17 | 62849438 | A | C | 0.439 | 0.214  | 0.044 | 1.50E-06 | -41093  | MARCHF10     |
| rs35572014 | 17 | 62849602 | C | T | 0.447 | 0.213  | 0.045 | 2.75E-06 | -41257  | MARCHF10     |
| rs12051594 | 17 | 62850242 | A | G | 0.456 | 0.212  | 0.044 | 1.49E-06 | -41897  | MARCHF10     |
| rs9915826  | 17 | 62850877 | T | C | 0.421 | 0.215  | 0.045 | 1.71E-06 | -42532  | MARCHF10     |
| rs9303464  | 17 | 62850993 | C | T | 0.447 | 0.213  | 0.045 | 2.75E-06 | -42648  | MARCHF10     |
| rs9890310  | 17 | 62851050 | G | T | 0.447 | 0.213  | 0.045 | 2.75E-06 | -42705  | MARCHF10     |
| rs9890570  | 17 | 62851197 | C | T | 0.421 | 0.215  | 0.045 | 1.71E-06 | -42852  | MARCHF10     |
| rs8076646  | 17 | 62852550 | T | C | 0.386 | 0.209  | 0.045 | 3.44E-06 | -44205  | MARCHF10     |
| rs8081770  | 17 | 62852855 | C | T | 0.465 | 0.217  | 0.047 | 3.98E-06 | -44510  | MARCHF10     |
| rs61638683 | 17 | 82849592 | T | G | 0.535 | -0.210 | 0.045 | 3.38E-06 | -9013   | ZNF750       |
| rs59300995 | 17 | 82849594 | C | G | 0.553 | -0.206 | 0.044 | 2.47E-06 | -9015   | ZNF750       |
| rs7216324  | 17 | 82851589 | C | A | 0.535 | -0.210 | 0.045 | 3.38E-06 | -11010  | ZNF750       |
| rs4986118  | 17 | 82851689 | C | G | 0.447 | 0.206  | 0.044 | 2.47E-06 | -11110  | ZNF750       |
| rs7215939  | 17 | 82851732 | G | C | 0.535 | -0.210 | 0.045 | 3.38E-06 | -11153  | ZNF750       |
| rs7214952  | 17 | 82851853 | T | G | 0.535 | -0.210 | 0.045 | 3.38E-06 | -11274  | ZNF750       |
| rs11077948 | 17 | 82852057 | T | C | 0.553 | -0.206 | 0.044 | 2.47E-06 | -11478  | ZNF750       |
| rs9913679  | 17 | 82855022 | G | A | 0.535 | -0.210 | 0.045 | 3.38E-06 | -14443  | ZNF750       |

|            |    |          |   |   |       |        |       |          |        |         |
|------------|----|----------|---|---|-------|--------|-------|----------|--------|---------|
| rs12600507 | 17 | 82856293 | A | G | 0.553 | -0.206 | 0.044 | 2.47E-06 | -15714 | ZNF750  |
| rs9303013  | 17 | 82857421 | C | T | 0.544 | -0.212 | 0.046 | 4.73E-06 | -16842 | ZNF750  |
| rs7220732  | 17 | 82857901 | C | A | 0.544 | -0.212 | 0.046 | 4.73E-06 | -17322 | ZNF750  |
| rs7209378  | 17 | 82859192 | A | G | 0.561 | -0.208 | 0.045 | 3.36E-06 | -18613 | ZNF750  |
| rs9890196  | 17 | 82860297 | C | T | 0.553 | -0.213 | 0.045 | 2.58E-06 | -19718 | ZNF750  |
| rs6502007  | 17 | 82861401 | G | A | 0.544 | -0.196 | 0.043 | 6.08E-06 | -20822 | ZNF750  |
| rs8082007  | 17 | 82862130 | A | G | 0.526 | -0.210 | 0.046 | 5.71E-06 | -21551 | ZNF750  |
| rs8065192  | 17 | 82862158 | G | A | 0.553 | -0.206 | 0.044 | 2.47E-06 | -21579 | ZNF750  |
| rs9303014  | 17 | 82866493 | T | G | 0.526 | -0.210 | 0.046 | 5.71E-06 | -25914 | ZNF750  |
| rs4986120  | 17 | 82866778 | G | T | 0.535 | -0.204 | 0.046 | 7.70E-06 | -26199 | ZNF750  |
| rs7224427  | 17 | 82867331 | A | G | 0.526 | -0.210 | 0.046 | 5.71E-06 | -26752 | ZNF750  |
| rs56353584 | 17 | 82869089 | G | T | 0.553 | -0.207 | 0.046 | 6.21E-06 | -28510 | ZNF750  |
| rs56322462 | 17 | 82869216 | T | C | 0.544 | -0.212 | 0.046 | 4.73E-06 | -28637 | ZNF750  |
| rs66893622 | 17 | 82869369 | T | A | 0.535 | -0.212 | 0.047 | 8.08E-06 | -28790 | ZNF750  |
| rs9892064  | 17 | 82870027 | T | C | 0.544 | -0.212 | 0.046 | 4.73E-06 | -29448 | ZNF750  |
| rs3744161  | 17 | 82870181 | A | G | 0.535 | -0.212 | 0.047 | 8.08E-06 | -29602 | ZNF750  |
| rs6502008  | 17 | 82872389 | A | G | 0.544 | -0.212 | 0.046 | 4.73E-06 | -31810 | ZNF750  |
| rs6502009  | 17 | 82872499 | T | C | 0.544 | -0.212 | 0.046 | 4.73E-06 | -31920 | ZNF750  |
| rs11655504 | 17 | 82873448 | C | T | 0.535 | -0.212 | 0.047 | 8.08E-06 | -32869 | ZNF750  |
| rs898093   | 17 | 82874591 | T | C | 0.535 | -0.212 | 0.047 | 8.08E-06 | -34012 | ZNF750  |
| rs4986123  | 17 | 82876370 | T | C | 0.544 | -0.205 | 0.045 | 4.52E-06 | -35791 | ZNF750  |
| rs8075190  | 17 | 82878558 | T | C | 0.544 | -0.201 | 0.045 | 8.17E-06 | -37979 | ZNF750  |
| rs9747095  | 17 | 82882712 | G | A | 0.474 | 0.204  | 0.044 | 4.30E-06 | -42133 | ZNF750  |
| rs7221830  | 17 | 82890938 | G | T | 0.474 | 0.204  | 0.044 | 4.30E-06 | -50359 | ZNF750  |
| rs59103510 | 17 | 82891072 | T | G | 0.518 | -0.204 | 0.045 | 7.08E-06 | -50493 | ZNF750  |
| rs12948880 | 17 | 82893224 | C | T | 0.474 | 0.210  | 0.046 | 5.71E-06 | -52645 | ZNF750  |
| rs4986130  | 17 | 82895802 | C | T | 0.482 | 0.204  | 0.045 | 7.08E-06 | -55223 | ZNF750  |
| rs4986131  | 17 | 82895920 | G | A | 0.482 | 0.204  | 0.045 | 7.08E-06 | -55341 | ZNF750  |
| rs12951357 | 17 | 82896533 | A | G | 0.474 | 0.210  | 0.046 | 5.71E-06 | -55954 | ZNF750  |
| rs1809252  | 17 | 82897473 | A | G | 0.518 | -0.204 | 0.045 | 7.08E-06 | -56894 | ZNF750  |
| rs939262   | 17 | 82897656 | G | C | 0.518 | -0.204 | 0.045 | 7.08E-06 | -57077 | ZNF750  |
| rs9891862  | 17 | 82900793 | A | G | 0.518 | -0.204 | 0.045 | 7.08E-06 | -60214 | ZNF750  |
| rs4986134  | 17 | 82901278 | A | G | 0.518 | -0.204 | 0.045 | 7.08E-06 | -60699 | ZNF750  |
| rs2292971  | 17 | 82905981 | C | T | 0.482 | 0.204  | 0.045 | 7.08E-06 | -65402 | ZNF750  |
| rs8074371  | 17 | 82908853 | C | G | 0.482 | 0.204  | 0.045 | 7.08E-06 | -68274 | ZNF750  |
| rs12947897 | 17 | 82913585 | G | A | 0.474 | 0.204  | 0.044 | 4.16E-06 | -73006 | ZNF750  |
| rs8064687  | 17 | 82915798 | C | G | 0.482 | 0.204  | 0.045 | 7.08E-06 | -75219 | ZNF750  |
| rs8069773  | 17 | 82916667 | T | G | 0.474 | 0.204  | 0.044 | 4.16E-06 | -76088 | ZNF750  |
| rs73007122 | 19 | 10004217 | T | C | 0.105 | 0.338  | 0.069 | 1.08E-06 | 6255   | COL5A3  |
| rs35143140 | 19 | 10005321 | A | G | 0.289 | 0.218  | 0.047 | 2.95E-06 | 5151   | COL5A3  |
| rs11085530 | 19 | 10006027 | G | A | 0.289 | 0.218  | 0.047 | 2.95E-06 | 4445   | COL5A3  |
| rs35678764 | 19 | 10006948 | A | C | 0.289 | 0.218  | 0.047 | 2.95E-06 | 3524   | COL5A3  |
| rs9797822  | 19 | 10007058 | A | C | 0.289 | 0.218  | 0.047 | 2.95E-06 | 3414   | COL5A3  |
| rs9797907  | 19 | 10007075 | G | T | 0.289 | 0.218  | 0.047 | 2.95E-06 | 3397   | COL5A3  |
| rs11672609 | 19 | 58495557 | T | C | 0.140 | 0.258  | 0.057 | 6.77E-06 | 16509  | SLC27A5 |
| rs11672614 | 19 | 58495617 | T | C | 0.140 | 0.258  | 0.057 | 6.77E-06 | 16449  | SLC27A5 |
| rs11672730 | 19 | 58495836 | A | G | 0.140 | 0.258  | 0.057 | 6.77E-06 | 16230  | SLC27A5 |
| rs55652736 | 19 | 58496199 | T | G | 0.140 | 0.258  | 0.057 | 6.77E-06 | 15867  | SLC27A5 |
| rs73066226 | 19 | 58496846 | C | T | 0.149 | 0.256  | 0.057 | 6.21E-06 | 15220  | SLC27A5 |
| rs11671092 | 19 | 58497742 | C | T | 0.149 | 0.256  | 0.057 | 6.21E-06 | 14324  | SLC27A5 |

|            |    |          |   |   |       |        |       |          |        |          |
|------------|----|----------|---|---|-------|--------|-------|----------|--------|----------|
| rs55928441 | 19 | 58498307 | C | T | 0.140 | 0.258  | 0.057 | 6.77E-06 | 13759  | SLC27A5  |
| rs73066228 | 19 | 58501829 | G | A | 0.140 | 0.258  | 0.057 | 7.22E-06 | 10237  | SLC27A5  |
| rs4810126  | 20 | 58244817 | T | C | 0.167 | 0.298  | 0.061 | 1.23E-06 | -16163 | ANKRD60  |
| rs76912023 | 20 | 58257517 | T | C | 0.158 | 0.300  | 0.062 | 1.39E-06 | -28863 | ANKRD60  |
| rs4811976  | 20 | 58259149 | A | G | 0.158 | 0.300  | 0.062 | 1.39E-06 | -30495 | ANKRD60  |
| rs563489   | 20 | 58355773 | G | A | 0.649 | -0.237 | 0.051 | 3.08E-06 | -33350 | VAPB     |
| rs71315381 | 22 | 17510895 | G | C | 0.140 | 0.274  | 0.061 | 6.67E-06 | -52545 | SLC25A18 |
| rs2142664  | 22 | 46559201 | G | A | 0.237 | 0.227  | 0.051 | 8.47E-06 | -16812 | GRAMD4   |

**Table S7.** Annotation of variants associated with *GATA4* activity level with  $p\text{-val} < 10^{-5}$ .

| Tags                | Chrom | Position  | Ref_Base | Alt_Base | strand | Codin g | Gene          | Sequence_Ontology   | cDNA_change     | Protein      | Driver   | Cscape_pre d |
|---------------------|-------|-----------|----------|----------|--------|---------|---------------|---------------------|-----------------|--------------|----------|--------------|
| chr1.g.3681352G>T   | chr1  | 3681352   | G        | T        | +      |         | TP73          | intron_variant      | c.-33-981G>T    |              |          | driver       |
| chr1.g.14161090C>T  | chr1  | 14161090  | C        | T        | +      |         | KAZN          | intron_variant      | c.92-19345C>T   |              |          | passenger    |
| chr1.g.15541637A>C  | chr1  | 15541637  | A        | C        | +      |         | DNAC16        | intron_variant      | c.575-2762A>C   |              |          | passenger    |
| chr1.g.30722679C>T  | chr1  | 30722679  | C        | T        | +      |         | MATN1         | intron_variant      | c.94+779G>A     |              |          | driver       |
| chr1.g.35306972T>A  | chr1  | 35306972  | T        | A        | +      |         | ZMYM4         | intron_variant      | c.40-18388T>A   |              |          | driver       |
| chr1.g.44495436G>A  | chr1  | 44495436  | G        | A        | +      |         | RNF220        | intron_variant      | c.625+82714G>A  |              |          | driver       |
| chr1.g.45958363G>T  | chr1  | 45958363  | G        | T        | +      |         | MAST2         | intron_variant      | c.501-1023G>T   |              |          | driver       |
| chr1.g.51680266A>T  | chr1  | 51680266  | A        | T        | +      |         | OSBPL9        | intron_variant      | c.241+10754A>T  |              |          | driver       |
| chr1.g.66551873T>C  | chr1  | 66551873  | T        | C        | +      |         | SGIP1         | intron_variant      | c.10+17505T>C   |              |          | passenger    |
| chr1.g.76475386T>G  | chr1  | 76475386  | T        | G        | +      |         | ST6GALNAC3    | intron_variant      | c.623+62969T>G  |              |          | driver       |
| chr1.g.76934820G>A  | chr1  | 76934820  | G        | A        | +      |         | ST6GALNAC5    | intron_variant      | c.261+66078G>A  |              |          | driver       |
| chr1.g.81962684G>T  | chr1  | 81962684  | G        | T        | +      |         | ADGRL2        | intron_variant      | c.2006-3374G>T  |              |          | driver       |
| chr1.g.100489433C>T | chr1  | 100489433 | C        | T        | +      |         | CDC14A        | intron_variant      | c.1137+4962C>T  |              |          | driver       |
| chr1.g.109273131C>G | chr1  | 109273131 | C        | G        | +      |         | CELSR2        | intron_variant      | c.8339-35C>G    |              |          | driver       |
| chr1.g.115979836T>A | chr1  | 115979836 | T        | A        | +      |         | SLC22A15      | intron_variant      | c.87+3122T>A    |              |          | driver       |
| chr1.g.150375962C>G | chr1  | 150375962 | C        | G        | +      |         | RPRD2         | intron_variant      | c.205+11043C>G  |              |          | driver       |
| chr1.g.154250525G>T | chr1  | 154250525 | G        | T        | +      |         | UBAP2L        | intron_variant      | c.1214-516G>T   |              |          | driver       |
| chr1.g.155183439G>T | chr1  | 155183439 | G        | T        | +      |         | TRIM46        | intron_variant      | c.1887-358G>T   |              |          | driver       |
| chr1.g.155278125G>T | chr1  | 155278125 | G        | T        | +      |         | HNC3          | intron_variant      | c.278+257G>T    |              |          | driver       |
| chr1.g.157694861C>G | chr1  | 157694861 | C        | G        | +      |         | FCRL3         | intron_variant      | c.1411+468G>C   |              |          | passenger    |
| chr1.g.161161206G>A | chr1  | 161161206 | G        | A        | +      | Yes     | USP21         | missense_variant    | c.566G>A        | p.Arg189Gln  |          | driver       |
| chr1.g.162640635A>G | chr1  | 162640635 | A        | G        | +      |         | DDR2          | intron_variant      | c.-192+8004A>G  |              | Oncogene | passenger    |
| chr1.g.169711411G>A | chr1  | 169711411 | G        | A        | +      |         | SELL          | intron_variant      | c.3+85C>T       |              |          | driver       |
| chr1.g.176766253C>A | chr1  | 176766253 | C        | A        | +      |         | PAPPA2        | intron_variant      | c.4323+416C>A   |              |          | driver       |
| chr1.g.178211277T>C | chr1  | 178211277 | T        | C        | +      |         | RASAL2        | intron_variant      | c.203-7228T>C   |              |          | passenger    |
| chr1.g.178473177C>G | chr1  | 178473177 | C        | G        | +      | Yes     | RASAL2        | missense_variant    | c.3781C>G       | p.Pro1261Ala |          | Damaging     |
| chr1.g.180074023T>G | chr1  | 180074023 | T        | G        | +      |         | CEP350        | intron_variant      | c.5568-999T>G   |              |          | driver       |
| chr1.g.185941653A>G | chr1  | 185941653 | A        | G        | +      |         | HMCN1         | intron_variant      | c.1828+7829A>G  |              |          | passenger    |
| chr1.g.186075049C>G | chr1  | 186075049 | C        | G        | +      |         | HMCN1         | intron_variant      | c.8290+158C>G   |              |          | driver       |
| chr1.g.186935924A>C | chr1  | 186935924 | A        | C        | +      |         | PLA2G4A       | intron_variant      | c.695+3025A>C   |              |          | driver       |
| chr1.g.188041799A>T | chr1  | 188041799 | A        | T        | +      |         | AL136372.2    | lnc_RNA             |                 |              |          | driver       |
| chr1.g.201578348C>G | chr1  | 201578348 | C        | G        | +      |         |               |                     |                 |              |          | driver       |
| chr1.g.209758085C>T | chr1  | 209758085 | C        | T        | +      |         | TRAF3IP3      | intron_variant      | c.-159-949C>T   |              |          | driver       |
| chr1.g.210010348C>G | chr1  | 210010348 | C        | G        | +      |         | SYT14         | intron_variant      | c.-485-3285C>G  |              |          | driver       |
| chr1.g.220576354C>A | chr1  | 220576354 | C        | A        | +      |         | MARK1         | intron_variant      | c.52-3000C>A    |              |          | driver       |
| chr1.g.228017313T>A | chr1  | 228017313 | T        | A        | +      |         | WNT3A         | intron_variant      | c.72-5354T>A    |              |          | driver       |
| chr1.g.237459319T>C | chr1  | 237459319 | T        | C        | +      |         | RYR2          | intron_variant      | c.1612+2584T>C  |              |          | driver       |
| chr1.g.240028568C>A | chr1  | 240028568 | C        | A        | +      |         |               |                     |                 |              |          | driver       |
| chr1.g.245447455A>G | chr1  | 245447455 | A        | G        | +      |         | KIF26B        | intron_variant      | c.1166+27710A>G |              |          | passenger    |
| chr2.g.1188021G>A   | chr2  | 1188021   | G        | A        | +      |         | SNHG2         | intron_variant      | c.591+14838G>A  |              |          | passenger    |
| chr2.g.9432457C>T   | chr2  | 9432457   | C        | T        | +      |         | CPSF3         | intron_variant      | c.342-54C>T     |              |          | driver       |
| chr2.g.16074161T>G  | chr2  | 16074161  | T        | G        | +      |         | GACAT3        | lnc_RNA             |                 |              |          | driver       |
| chr2.g.24702669A>T  | chr2  | 24702669  | A        | T        | +      |         | NCOA1         | intron_variant      | c.950-2417A>T   |              | fusion   | driver       |
| chr2.g.29156465G>A  | chr2  | 29156465  | G        | A        | +      |         | CLIP4         | intron_variant      | c.1255+22G>A    |              |          | driver       |
| chr2.g.32215682T>C  | chr2  | 32215682  | T        | C        | +      |         | SLC30A6       | intron_variant      | c.886-4531T>C   |              |          | driver       |
| chr2.g.33095778T>G  | chr2  | 33095778  | T        | G        | +      |         | LTBP1         | intron_variant      | c.864-14804T>G  |              |          | driver       |
| chr2.g.34329440C>G  | chr2  | 34329440  | C        | G        | +      |         | LINC01320     | lnc_RNA             |                 |              |          | driver       |
| chr2.g.38769064C>T  | chr2  | 38769064  | C        | T        | +      |         | GEMIN6        | intron_variant      | c.-186+865C>T   |              |          | passenger    |
| chr2.g.40035110G>T  | chr2  | 40035110  | G        | T        | +      |         | SLC8A1-AS1    | lnc_RNA             |                 |              |          | driver       |
| chr2.g.48681341T>C  | chr2  | 48681341  | T        | C        | +      |         | STON1-GTF2A1L | intron_variant      | c.3441+9661T>C  |              |          | driver       |
| chr2.g.54608766C>G  | chr2  | 54608766  | C        | G        | +      |         | SPTBN1        | intron_variant      | c.301-3395C>G   |              |          | driver       |
| chr2.g.58575802T>C  | chr2  | 58575802  | T        | C        | +      |         | LINC01122     | lnc_RNA             |                 |              |          | driver       |
| chr2.g.60897967G>C  | chr2  | 60897967  | G        | C        | +      |         | REL           | intron_variant      | c.303-3025G>C   |              | Oncogene | driver       |
| chr2.g.70952878T>A  | chr2  | 70952878  | T        | A        | +      |         | ATP6V1B1      | intron_variant      | c.175-5168T>A   |              |          | driver       |
| chr2.g.79837899T>A  | chr2  | 79837899  | T        | A        | +      |         | CTNNA2        | intron_variant      | c.299-20114T>A  |              | Oncogene | driver       |
| chr2.g.100985838A>G | chr2  | 100985838 | A        | G        | +      |         | NPAS2         | intron_variant      | c.1630-2241A>G  |              |          | passenger    |
| chr2.g.112535569C>G | chr2  | 112535569 | C        | G        | +      |         | TTL           | 3_prime_UTR_variant | c.6774C>G       |              |          | driver       |
| chr2.g.113259117T>C | chr2  | 113259117 | T        | C        | +      |         | PAX8          | intron_variant      | c.26-12198A>G   |              | fusion   | driver       |
| chr2.g.114846336T>A | chr2  | 114846336 | T        | A        | +      |         | DPP10         | intron_variant      | c.60+403498T>A  |              |          | driver       |
| chr2.g.115109813T>A | chr2  | 115109813 | T        | A        | +      |         | DPP10         | intron_variant      | c.61-199426T>A  |              |          | passenger    |
| chr2.g.115607698A>T | chr2  | 115607698 | A        | T        | +      |         | DPP10         | intron_variant      | c.453+81726A>T  |              |          | driver       |
| chr2.g.115667259G>T | chr2  | 115667259 | G        | T        | +      |         | DPP10         | intron_variant      | c.454-22428G>T  |              |          | driver       |
| chr2.g.124740757C>G | chr2  | 124740757 | C        | G        | +      |         | CNTNAP5       | intron_variant      | c.2075-6472C>G  |              |          | driver       |
| chr2.g.124798190T>G | chr2  | 124798190 | T        | G        | +      | Yes     | CNTNAP5       | synonymous_variant  | c.3084T>G       | p.Ala1028=   |          | passenger    |
| chr2.g.132479603A>T | chr2  | 132479603 | A        | T        | +      |         | GPR39         | intron_variant      | c.856+81705A>T  |              |          | driver       |
| chr2.g.137322267T>A | chr2  | 137322267 | T        | A        | +      |         | THSD7B        | intron_variant      | c.2500+46241T>A |              |          | driver       |
| chr2.g.148334545G>C | chr2  | 148334545 | G        | C        | +      |         | MBD5          | intron_variant      | c.-679-7669G>C  |              |          | passenger    |
| chr2.g.148723699A>T | chr2  | 148723699 | A        | T        | +      |         | EPC2          | intron_variant      | c.314-19923A>T  |              |          | driver       |
| chr2.g.149074274A>G | chr2  | 149074274 | A        | G        | +      |         | LYPD6B        | intron_variant      | c.-67+35473A>G  |              |          | passenger    |
| chr2.g.150275288T>A | chr2  | 150275288 | T        | A        | +      |         | LINC01818     | lnc_RNA             |                 |              |          | driver       |

|                     |      |           |   |   |   |     |             |                      |                  |             |           |
|---------------------|------|-----------|---|---|---|-----|-------------|----------------------|------------------|-------------|-----------|
| chr2.g.150567904C>T | chr2 | 150567904 | C | T | + |     | LINC01920   | lnc_RNA              |                  |             | driver    |
| chr2.g.157936587A>G | chr2 | 157936587 | A | G | + |     | UPP2        | intron_variant       | c.-19-58593A>G   |             | passenger |
| chr2.g.168552303T>G | chr2 | 168552303 | T | G | + |     | CERS6       | intron_variant       | c.276+4602T>G    |             | passenger |
| chr2.g.190962933G>T | chr2 | 190962933 | G | T | + | Yes | GLS         | missense_variant     | c.1957G>T        | p.Asp653Tyr | Damaging  |
| chr2.g.197861305G>C | chr2 | 197861305 | G | C | + |     | PLCL1       | intron_variant       | c.240+55966G>C   |             | driver    |
| chr2.g.198551454C>A | chr2 | 198551454 | C | A | + |     | AC019330.1  | lnc_RNA              |                  |             | passenger |
| chr2.g.202638873A>T | chr2 | 202638873 | A | T | + |     | FAM117B     | intron_variant       | c.601+3085A>T    |             | driver    |
| chr2.g.213671699A>T | chr2 | 213671699 | A | T | + |     | SPAG16      | intron_variant       | c.1070+181609A>T |             | driver    |
| chr2.g.213987362C>A | chr2 | 213987362 | C | A | + |     | SPAG16      | intron_variant       | c.1401-26589C>A  |             | driver    |
| chr2.g.214018972A>T | chr2 | 214018972 | A | T | + |     | SPAG16      | intron_variant       | c.1527+4895A>T   |             | driver    |
| chr2.g.220120078C>T | chr2 | 220120078 | C | T | + |     | AC019211.1  | lnc_RNA              |                  |             | driver    |
| chr2.g.220508784C>T | chr2 | 220508784 | C | T | + |     | AC067956.1  | lnc_RNA              |                  |             | driver    |
| chr2.g.228990241A>G | chr2 | 228990241 | A | G | + |     | RHBD1       | intron_variant       | c.857-5190A>G    |             | passenger |
| chr2.g.231394417G>A | chr2 | 231394417 | G | A | + |     | B3GN17      | 2kb_upstream_variant | c.-1387G>A       |             | driver    |
| chr2.g.235953574G>A | chr2 | 235953574 | G | A | + |     | AGAP1       | intron_variant       | c.1484-14888G>A  |             | driver    |
| chr2.g.236286454G>T | chr2 | 236286454 | G | T | + |     | AC019068.1  | lnc_RNA              |                  |             | driver    |
| chr3.g.6365657A>T   | chr3 | 6365657   | A | T | + |     | AC026167.1  | lnc_RNA              |                  |             | driver    |
| chr3.g.6609337G>A   | chr3 | 6609337   | G | A | + |     | AC069277.1  | lnc_RNA              |                  |             | driver    |
| chr3.g.7305152T>G   | chr3 | 7305152   | T | G | + |     | GRM7        | intron_variant       | c.879-1346T>G    |             | passenger |
| chr3.g.10839981C>T  | chr3 | 10839981  | C | T | + |     | SLOC6A11    | intron_variant       | c.624-4233C>T    |             | driver    |
| chr3.g.14032170A>C  | chr3 | 14032170  | A | C | + |     |             |                      |                  |             | passenger |
| chr3.g.19948616T>G  | chr3 | 19948616  | T | G | + |     | RAB5A       | intron_variant       | c.-94+1095T>G    |             | driver    |
| chr3.g.34412954G>T  | chr3 | 34412954  | G | T | + |     | LINC01811   | lnc_RNA              |                  |             | driver    |
| chr3.g.44771843A>G  | chr3 | 44771843  | A | G | + |     | KIF15       | intron_variant       | c.20-2552A>G     |             | passenger |
| chr3.g.49509162T>A  | chr3 | 49509162  | T | A | + |     | DAG1        | intron_variant       | c.-116-1257T>A   |             | passenger |
| chr3.g.54575295G>A  | chr3 | 54575295  | G | A | + |     | CACNA2D3    | intron_variant       | c.888+5191G>A    |             | driver    |
| chr3.g.81088421C>A  | chr3 | 81088421  | C | A | + |     | LINC02027   | lnc_RNA              |                  |             | driver    |
| chr3.g.88444902A>G  | chr3 | 88444902  | A | G | + |     | CSNKA2IP    | intron_variant       | c.-270-20186A>G  |             | driver    |
| chr3.g.94956521T>C  | chr3 | 94956521  | T | C | + |     | LINC00879   | lnc_RNA              |                  |             | driver    |
| chr3.g.97834926G>A  | chr3 | 97834926  | G | A | + |     | CRYBG3      | intron_variant       | c.150-8269G>A    |             | passenger |
| chr3.g.99670402C>T  | chr3 | 99670402  | C | T | + |     | COL8A1      | intron_variant       | c.-129+31738C>T  |             | driver    |
| chr3.g.111174448G>A | chr3 | 111174448 | G | A | + |     | NECTIN3     | intron_variant       | c.1222-17903G>A  |             | driver    |
| chr3.g.111625372A>C | chr3 | 111625372 | A | C | + |     | CD96        | intron_variant       | c.1321+968A>C    |             | driver    |
| chr3.g.111841793C>A | chr3 | 111841793 | C | A | + |     | PLCX2       | intron_variant       | c.*34-4028C>A    |             | driver    |
| chr3.g.116714869T>A | chr3 | 116714869 | T | A | + |     | TUSC7       | lnc_RNA              |                  |             | driver    |
| chr3.g.124126286T>C | chr3 | 124126286 | T | C | + |     | KALRN       | intron_variant       | c.67+31382T>C    |             | driver    |
| chr3.g.127955278C>T | chr3 | 127955278 | C | T | + |     | KBTD12      | intron_variant       | c.1493-7911C>T   |             | driver    |
| chr3.g.128888189C>G | chr3 | 128888189 | C | G | + |     | ACAD9       | intron_variant       | c.244+3443C>G    |             | driver    |
| chr3.g.130859697C>A | chr3 | 130859697 | C | A | + |     | ATP2C1      | intron_variant       | c.108+8769C>A    |             | driver    |
| chr3.g.133186058G>A | chr3 | 133186058 | G | A | + |     | TMEM108     | intron_variant       | c.-46-43208G>A   |             | passenger |
| chr3.g.134700794G>T | chr3 | 134700794 | G | T | + |     | EPHB1       | processed_transcript |                  |             | driver    |
| chr3.g.134753318A>C | chr3 | 134753318 | A | C | + |     | EPHB1       | processed_transcript |                  |             | driver    |
| chr3.g.136881088C>G | chr3 | 136881088 | C | G | + |     | NCK1        | intron_variant       | c.-19+18735C>G   |             | driver    |
| chr3.g.139174032G>T | chr3 | 139174032 | G | T | + |     | MRPS22      | intron_variant       | c.-142-6258G>T   |             | driver    |
| chr3.g.141521412G>A | chr3 | 141521412 | G | A | + |     | RASA2       | intron_variant       | c.355+4981G>A    |             | passenger |
| chr3.g.142703070G>C | chr3 | 142703070 | G | C | + |     | PLS1        | intron_variant       | c.1372-798G>C    |             | driver    |
| chr3.g.142979146A>G | chr3 | 142979146 | A | G | + |     | PAQR9-AS1   | lnc_RNA              |                  |             | passenger |
| chr3.g.144047347C>G | chr3 | 144047347 | C | G | + |     | DIPK2A      | processed_transcript |                  |             | driver    |
| chr3.g.148282041A>G | chr3 | 148282041 | A | G | + |     | LINC02046   | lnc_RNA              |                  |             | driver    |
| chr3.g.150430002G>T | chr3 | 150430002 | G | T | + |     | TSC22D2     | intron_variant       | c.2030+6882G>T   |             | driver    |
| chr3.g.155089896G>A | chr3 | 155089896 | G | A | + |     | MME         | intron_variant       | c.196+4802G>A    |             | driver    |
| chr3.g.158454605A>G | chr3 | 158454605 | A | G | + |     | RSRC1       | intron_variant       | c.584-6330A>G    |             | passenger |
| chr3.g.173997558T>A | chr3 | 173997558 | T | A | + |     | NLGN1       | intron_variant       | c.646+189726T>A  |             | passenger |
| chr3.g.174065536A>C | chr3 | 174065536 | A | C | + |     | NLGN1       | intron_variant       | c.647-209779A>C  |             | driver    |
| chr3.g.174695828C>G | chr3 | 174695828 | C | G | + |     | NAALADL2    | processed_transcript |                  |             | driver    |
| chr3.g.174800812C>T | chr3 | 174800812 | C | T | + |     |             |                      |                  |             | passenger |
| chr3.g.175149930C>T | chr3 | 175149930 | C | T | + |     | NAALADL2    | intron_variant       | c.545+52639C>T   |             | driver    |
| chr3.g.177597781T>A | chr3 | 177597781 | T | A | + |     | LINC00578   | lnc_RNA              |                  |             | driver    |
| chr3.g.189881926A>G | chr3 | 189881926 | A | G | + |     | TP63        | intron_variant       | c.1350-4468A>G   | Oncogene    | NA        |
| chr4.g.1114786C>T   | chr4 | 1114786   | C | T | + |     | RNF212      | 2kb_upstream_variant | c.-1322G>A       |             | driver    |
| chr4.g.1210659C>T   | chr4 | 1210659   | C | T | + |     | SPON2       | 2kb_upstream_variant | c.-2322G>A       |             | passenger |
| chr4.g.3421442G>A   | chr4 | 3421442   | G | A | + |     | RGS12       | intron_variant       | c.2838+724G>A    |             | driver    |
| chr4.g.3432622A>T   | chr4 | 3432622   | A | T | + |     | RGS12       | intron_variant       | c.4114+1667A>T   |             | driver    |
| chr4.g.7006997G>T   | chr4 | 7006997   | G | T | + |     | TBC1D14     | intron_variant       | c.1446+271G>T    |             | driver    |
| chr4.g.13746398T>C  | chr4 | 13746398  | T | C | + |     | LINC01182   | lnc_RNA              |                  |             | driver    |
| chr4.g.13781262A>T  | chr4 | 13781262  | A | T | + |     | LINC01182   | lnc_RNA              |                  |             | driver    |
| chr4.g.19574266G>T  | chr4 | 19574266  | G | T | + |     | AC024230.1  | lnc_RNA              |                  |             | driver    |
| chr4.g.23019814T>G  | chr4 | 23019814  | T | G | + |     | AC097512.1  | lnc_RNA              |                  |             | driver    |
| chr4.g.23048783T>C  | chr4 | 23048783  | T | C | + |     | AC097512.1  | lnc_RNA              |                  |             | driver    |
| chr4.g.23670561G>C  | chr4 | 23670561  | G | C | + |     | AC093607.1  | lnc_RNA              |                  |             | driver    |
| chr4.g.29169963C>G  | chr4 | 29169963  | C | G | + |     | ACT109349.1 | lnc_RNA              |                  |             | driver    |
| chr4.g.56436046C>G  | chr4 | 56436046  | C | G | + |     | PPAT        | 2kb_upstream_variant | c.-569G>C        |             | driver    |

|                     |      |           |   |   |   |            |                      |                  |           |             |           |
|---------------------|------|-----------|---|---|---|------------|----------------------|------------------|-----------|-------------|-----------|
| chr4.g.59028181A>T  | chr4 | 59028181  | A | T | + | LINC02429  | lnc_RNA              |                  |           |             | driver    |
| chr4.g.61981294T>C  | chr4 | 61981294  | T | C | + | ADGRL3     | intron_variant       | c.3015+1522T>C   |           |             | passenger |
| chr4.g.89894038A>G  | chr4 | 89894038  | A | G | + | MMRN1      | 2kb_upstream_variant | c.-934A>G        |           |             | driver    |
| chr4.g.93163126G>T  | chr4 | 93163126  | G | T | + | GRID2      | intron_variant       | c.736-44278G>T   |           |             | driver    |
| chr4.g.93166692T>A  | chr4 | 93166692  | T | A | + | GRID2      | intron_variant       | c.736-40712T>A   |           |             | driver    |
| chr4.g.96505211C>A  | chr4 | 96505211  | C | A | + | LINC02267  | lnc_RNA              |                  |           |             | passenger |
| chr4.g.98380687A>T  | chr4 | 98380687  | A | T | + | RAP1GDS1   | intron_variant       | c.508+1524A>T    | Oncogene  |             | NA        |
| chr4.g.101746289A>G | chr4 | 101746289 | A | G | + | BANK1      | intron_variant       | c.25+24856A>G    |           |             | passenger |
| chr4.g.104011805T>A | chr4 | 104011805 | T | A | + | LINC02503  | lnc_RNA              |                  |           |             | driver    |
| chr4.g.10825495G>T  | chr4 | 10825495  | G | T | + | LEF1-AS1   | lnc_RNA              |                  |           |             | driver    |
| chr4.g.113196977C>A | chr4 | 113196977 | C | A | + | ANK2       | intron_variant       | c.285+511C>A     |           |             | driver    |
| chr4.g.117635919A>G | chr4 | 117635919 | A | G | + | LINC01378  | lnc_RNA              |                  |           |             | passenger |
| chr4.g.122158422G>T | chr4 | 122158422 | G | T | + | KIAA1109   | intron_variant       | c.-34+4310G>T    |           |             | driver    |
| chr4.g.139696519G>C | chr4 | 139696519 | G | C | + | MGST2      | intron_variant       | c.229+1252G>C    |           |             | passenger |
| chr4.g.143695068A>G | chr4 | 143695068 | A | G | + | FREM3      | intron_variant       | c.5185+423T>C    |           |             | passenger |
| chr4.g.149213486C>G | chr4 | 149213486 | C | G | + | LINC02355  | lnc_RNA              |                  |           |             | driver    |
| chr4.g.153203673C>T | chr4 | 153203673 | C | T | + | TRIM2      | 2kb_upstream_variant | c.-858C>T        |           |             | driver    |
| chr4.g.153616110G>C | chr4 | 153616110 | G | C | + | TMEM131L   | intron_variant       | c.3567+3710G>C   |           |             | driver    |
| chr4.g.163115073T>G | chr4 | 163115073 | T | G | + | NAF1       | intron_variant       | c.115-4783A>C    |           |             | driver    |
| chr4.g.172577463A>T | chr4 | 172577463 | A | T | + | GALNTL6    | intron_variant       | c.553+228774A>T  |           |             | driver    |
| chr4.g.173243720A>C | chr4 | 173243720 | A | C | + | GALNT7     | intron_variant       | c.127-4260A>C    |           |             | driver    |
| chr4.g.182280202A>T | chr4 | 182280202 | A | T | + | TENM3      | intron_variant       | c.-76+36726A>T   |           |             | driver    |
| chr4.g.182431205G>T | chr4 | 182431205 | G | T | + | TENM3      | intron_variant       | c.511+84276G>T   |           |             | driver    |
| chr4.g.182507374C>A | chr4 | 182507374 | C | A | + | TENM3      | intron_variant       | c.512-93550C>A   |           |             | driver    |
| chr4.g.182563868T>A | chr4 | 182563868 | T | A | + | TENM3      | intron_variant       | c.512-37056T>A   |           |             | driver    |
| chr5.g.5185948T>A   | chr5 | 5185948   | T | A | + | ADAMTS16   | intron_variant       | c.764-104T>A     |           |             | driver    |
| chr5.g.7154175C>A   | chr5 | 7154175   | C | A | + | LINC02196  | lnc_RNA              |                  |           |             | passenger |
| chr5.g.7548656T>G   | chr5 | 7548656   | T | G | + | ADCY2      | intron_variant       | c.570+27757T>G   |           |             | driver    |
| chr5.g.14345341G>C  | chr5 | 14345341  | G | C | + | TRIO       | intron_variant       | c.2046+8614G>C   |           |             | driver    |
| chr5.g.23988557G>A  | chr5 | 23988557  | G | A | + | C5orf17    | lnc_RNA              |                  |           |             | driver    |
| chr5.g.25313695A>G  | chr5 | 25313695  | A | G | + | LINC02211  | lnc_RNA              |                  |           |             | passenger |
| chr5.g.40477185C>G  | chr5 | 40477185  | C | G | + | AC114977.2 | lnc_RNA              |                  |           |             | driver    |
| chr5.g.57437457C>A  | chr5 | 57437457  | C | A | + | AC025470.2 | lnc_RNA              |                  |           |             | driver    |
| chr5.g.64928228T>C  | chr5 | 64928228  | T | C | + | CWC27      | intron_variant       | c.1042+42682T>C  |           |             | driver    |
| chr5.g.64956701A>G  | chr5 | 64956701  | A | G | + | CWC27      | intron_variant       | c.1043-15002A>G  |           |             | passenger |
| chr5.g.64957486G>T  | chr5 | 64957486  | G | T | + | CWC27      | intron_variant       | c.1043-14217G>T  |           |             | driver    |
| chr5.g.68191817G>T  | chr5 | 68191817  | G | T | + | LINC02219  | lnc_RNA              |                  |           |             | driver    |
| chr5.g.81982435G>A  | chr5 | 81982435  | G | A | + | ATG10      | intron_variant       | c.-12-5124G>A    |           |             | driver    |
| chr5.g.91044944G>A  | chr5 | 91044944  | G | A | + | ADGRV1     | intron_variant       | c.18153-27503G>A |           |             | driver    |
| chr5.g.92436571G>A  | chr5 | 92436571  | G | A | + | AC114316.1 | lnc_RNA              |                  |           |             | passenger |
| chr5.g.97887192T>A  | chr5 | 97887192  | T | A | + | LINC02234  | lnc_RNA              |                  |           |             | driver    |
| chr5.g.127421768T>G | chr5 | 127421768 | T | G | + | MEGF10     | intron_variant       | c.1591-902T>G    |           |             | passenger |
| chr5.g.134445724A>T | chr5 | 134445724 | A | T | + | AC109454.3 | lnc_RNA              |                  |           |             | driver    |
| chr5.g.152260358G>T | chr5 | 152260358 | G | T | + | LINC01933  | lnc_RNA              |                  |           |             | driver    |
| chr5.g.153700837G>T | chr5 | 153700837 | G | T | + | GRIA1      | intron_variant       | c.1452+1764G>T   |           |             | driver    |
| chr5.g.159434120G>T | chr5 | 159434120 | G | T | + | AC008691.1 | lnc_RNA              |                  |           |             | driver    |
| chr5.g.165506487T>A | chr5 | 165506487 | T | A | + | AC008415.1 | lnc_RNA              |                  |           |             | driver    |
| chr5.g.170081575G>A | chr5 | 170081575 | G | A | + | DOCK2      | intron_variant       | c.5288-267G>A    |           |             | driver    |
| chr6.g.12044114T>A  | chr6 | 12044114  | T | A | + | HIVEP1     | intron_variant       | c.40+28446T>A    |           |             | driver    |
| chr6.g.20883039T>G  | chr6 | 20883039  | T | G | + | CDKAL1     | intron_variant       | c.742+36861T>G   |           |             | driver    |
| chr6.g.36105324C>A  | chr6 | 36105324  | C | A | + | MAPK14     | intron_variant       | c.842-2131C>A    |           |             | driver    |
| chr6.g.37321898G>A  | chr6 | 37321898  | G | A | + | TBC1D22B   | intron_variant       | c.1389+4692G>A   |           |             | driver    |
| chr6.g.39946885C>T  | chr6 | 39946885  | C | T | + |            |                      |                  |           |             | driver    |
| chr6.g.68779117T>A  | chr6 | 68779117  | T | A | + | ADGRB3     | intron_variant       | c.757+13968T>A   |           |             | passenger |
| chr6.g.68868792G>T  | chr6 | 68868792  | G | T | + | ADGRB3     | intron_variant       | c.758-61767G>T   |           |             | driver    |
| chr6.g.69339927C>A  | chr6 | 69339927  | C | A | + | ADGRB3     | intron_variant       | c.3459+423C>A    |           |             | driver    |
| chr6.g.70056631C>A  | chr6 | 70056631  | C | A | + | COL19A1    | intron_variant       | c.1171-11792C>A  |           |             | driver    |
| chr6.g.70075619A>G  | chr6 | 70075619  | A | G | + | COL19A1    | intron_variant       | c.1224+7143A>G   |           |             | passenger |
| chr6.g.70780496G>A  | chr6 | 70780496  | G | A | + | SMAP1      | intron_variant       | c.414+7071G>A    |           |             | driver    |
| chr6.g.73123940G>T  | chr6 | 73123940  | G | T | + | KCNQ5      | intron_variant       | c.1221-546G>T    |           |             | driver    |
| chr6.g.73797890A>G  | chr6 | 73797890  | A | G | + | CD109      | intron_variant       | c.2878+5088A>G   |           |             | passenger |
| chr6.g.74111617A>T  | chr6 | 74111617  | A | T | + | AL357507.1 | lnc_RNA              |                  |           |             | driver    |
| chr6.g.74152850T>C  | chr6 | 74152850  | T | C | + | AL357507.1 | lnc_RNA              |                  |           |             | passenger |
| chr6.g.101286867C>T | chr6 | 101286867 | C | T | + | GRIK2      | intron_variant       | c.-294+4221C>T   |           |             | driver    |
| chr6.g.10175446A>G  | chr6 | 10175446  | A | G | + | GRIK2      | intron_variant       | c.952-45184A>G   |           |             | passenger |
| chr6.g.116176772G>A | chr6 | 116176772 | G | A | + | NTSDC1     | intron_variant       | c.530-44282G>A   |           |             | passenger |
| chr6.g.116714965G>A | chr6 | 116714965 | G | A | + | KPNA5      | intron_variant       | c.657-1254G>A    |           |             | driver    |
| chr6.g.118224818A>G | chr6 | 118224818 | A | G | + | SLC35F1    | intron_variant       | c.350-10691A>G   |           |             | passenger |
| chr6.g.124773947G>A | chr6 | 124773947 | G | A | + | NKAIN2     | intron_variant       | c.475-17392G>A   |           |             | driver    |
| chr6.g.131733705G>A | chr6 | 131733705 | G | A | + | Yes        | ENPP3                | missense_variant | c.2071G>A | p.Gly691Ser | Tolerated |
| chr6.g.135957066T>C | chr6 | 135957066 | T | C | + | PDE7B      | intron_variant       | c.82+9542T>C     |           |             | passenger |
| chr6.g.146604146G>A | chr6 | 146604146 | G | A | + | ADGB       | intron_variant       | c.74+5032G>A     |           |             | passenger |
| chr6.g.147794379C>T | chr6 | 147794379 | C | T | + | AL033504.1 | lnc_RNA              |                  |           |             | driver    |
| chr6.g.154116315G>C | chr6 | 154116315 | G | C | + | OPRM1      | intron_variant       | c.1444-2368G>C   |           |             | driver    |

|                     |      |           |   |   |   |     |            |                      |                  |             |          |           |
|---------------------|------|-----------|---|---|---|-----|------------|----------------------|------------------|-------------|----------|-----------|
| chr6.g.157200395G>C | chr6 | 157200395 | G | C | + |     | ARID1B     | intron_variant       | c.4231-310G>C    |             | TSG      | passenger |
| chr6.g.159222508C>T | chr6 | 159222508 | C | T | + |     | FNDC1      | intron_variant       | c.766+812C>T     |             |          | driver    |
| chr6.g.162894670G>T | chr6 | 162894670 | G | T | + |     | PACRG      | intron_variant       | c.291+80389G>T   |             |          | driver    |
| chr6.g.162909120C>A | chr6 | 162909120 | C | A | + |     | PACRG      | intron_variant       | c.291+94839C>A   |             |          | driver    |
| chr7.g.855276G>A    | chr7 | 855276    | G | A | + |     | SUN1       | intron_variant       | c.1350+270G>A    |             |          | passenger |
| chr7.g.7825972T>A   | chr7 | 7825972   | T | A | + |     | UMAD1      | intron_variant       | c.156+24229T>A   |             |          | driver    |
| chr7.g.8686331C>G   | chr7 | 8686331   | C | G | + |     | NXPH1      | intron_variant       | c.55-64877C>G    |             |          | driver    |
| chr7.g.10704508C>A  | chr7 | 10704508  | C | A | + |     | AC004415.1 | lnc_RNA              |                  |             |          | driver    |
| chr7.g.11129473A>T  | chr7 | 11129473  | A | T | + |     | PHF14      | intron_variant       | c.2772+18006A>T  |             |          | driver    |
| chr7.g.12514849G>A  | chr7 | 12514849  | G | A | + |     | AC013470.2 | intron_variant       | c.4-8122G>A      |             |          | driver    |
| chr7.g.16243030C>A  | chr7 | 16243030  | C | A | + |     | CRPPA      | intron_variant       | c.1119+15360G>T  |             |          | driver    |
| chr7.g.18227294T>C  | chr7 | 18227294  | T | C | + |     | HDAC9      | intron_variant       | c.25+64945T>C    |             |          | driver    |
| chr7.g.20365348C>G  | chr7 | 20365348  | C | G | + |     | ITGB8      | intron_variant       | c.213+1626C>G    |             |          | driver    |
| chr7.g.24617711G>C  | chr7 | 24617711  | G | C | + |     | MPP6       | intron_variant       | c.-2-5955G>C     |             |          | driver    |
| chr7.g.30976222C>T  | chr7 | 30976222  | C | T | + |     | GHRHR      | intron_variant       | c.975-207C>T     |             |          | driver    |
| chr7.g.34692963T>A  | chr7 | 34692963  | T | A | + |     | NFSR1      | intron_variant       | c.280+8279T>A    |             |          | driver    |
| chr7.g.36267210C>T  | chr7 | 36267210  | C | T | + |     | EEDP1      | intron_variant       | c.931-13905C>T   |             |          | driver    |
| chr7.g.39836131A>T  | chr7 | 39836131  | A | T | + |     |            |                      |                  |             |          | driver    |
| chr7.g.49795584C>A  | chr7 | 49795584  | C | A | + |     | VWC2       | intron_variant       | c.697-7127C>A    |             |          | driver    |
| chr7.g.51551203G>T  | chr7 | 51551203  | G | T | + |     | AC005999.2 | lnc_RNA              |                  |             |          | driver    |
| chr7.g.55050817A>T  | chr7 | 55050817  | A | T | + |     | EGFR       | intron_variant       | c.88+31452A>T    |             | Oncogene | driver    |
| chr7.g.79785221G>A  | chr7 | 79785221  | G | A | + |     | GNAI1      | intron_variant       | c.434+12221G>A   |             |          | passenger |
| chr7.g.79888512T>G  | chr7 | 79888512  | T | G | + |     | GNAI1      | intron_variant       | c.-433-68458T>G  |             |          | driver    |
| chr7.g.84548649A>T  | chr7 | 84548649  | A | T | + |     | AC003984.1 | lnc_RNA              |                  |             |          | driver    |
| chr7.g.85467638T>G  | chr7 | 85467638  | T | G | + |     | LINC00972  | lnc_RNA              |                  |             |          | driver    |
| chr7.g.87763109C>T  | chr7 | 87763109  | C | T | + |     | RUNDC3B    | intron_variant       | c.681-7472C>T    |             |          | driver    |
| chr7.g.87768664G>A  | chr7 | 87768664  | G | A | + |     | RUNDC3B    | intron_variant       | c.681-1917G>A    |             |          | driver    |
| chr7.g.88034598T>C  | chr7 | 88034598  | T | C | + |     | ADAM22     | intron_variant       | c.324-41028T>C   |             |          | passenger |
| chr7.g.88064841C>T  | chr7 | 88064841  | C | T | + |     | ADAM22     | intron_variant       | c.324-10785C>T   |             |          | passenger |
| chr7.g.88865329C>G  | chr7 | 88865329  | C | G | + |     | ZNF804B    | intron_variant       | c.108+105245C>G  |             |          | driver    |
| chr7.g.88907133T>A  | chr7 | 88907133  | T | A | + |     | ZNF804B    | intron_variant       | c.108+147049T>A  |             |          | driver    |
| chr7.g.89032430T>C  | chr7 | 89032430  | T | C | + |     | ZNF804B    | intron_variant       | c.109-185725T>C  |             |          | passenger |
| chr7.g.89319597A>T  | chr7 | 89319597  | A | T | + |     | ZNF804B    | intron_variant       | c.250-7747A>T    |             |          | driver    |
| chr7.g.90595208C>T  | chr7 | 90595208  | C | T | + |     | CDK14      | Zkb_upstream_variant | c.-1420C>T       |             |          | driver    |
| chr7.g.90617082C>T  | chr7 | 90617082  | C | T | + |     | CDK14      | intron_variant       | c.123+12833C>T   |             |          | driver    |
| chr7.g.93628884T>A  | chr7 | 93628884  | T | A | + |     | NGT1       | intron_variant       | c.-56+37113T>A   |             |          | driver    |
| chr7.g.93690647G>A  | chr7 | 93690647  | G | A | + |     | NGT1       | intron_variant       | c.-56+98876G>A   |             |          | driver    |
| chr7.g.93801545G>T  | chr7 | 93801545  | G | T | + |     | NGT1       | intron_variant       | c.-55-84961G>T   |             |          | driver    |
| chr7.g.102161506A>T | chr7 | 102161506 | A | T | + |     | CUX1       | intron_variant       | c.723+2898A>T    |             | Oncogene | NA        |
| chr7.g.108611327C>G | chr7 | 108611327 | C | G | + |     | AC005487.1 | lnc_RNA              |                  |             |          | driver    |
| chr7.g.111123438A>G | chr7 | 111123438 | A | G | + | Yes | LRRN3      | missense_variant     | c.666A>G         | p.Ile222Met |          | 0.16862   |
| chr7.g.114388206A>T | chr7 | 114388206 | A | T | + |     | FOXP2      | intron_variant       | c.-10-38296A>T   |             |          | driver    |
| chr7.g.120370053C>G | chr7 | 120370053 | C | G | + |     | KCND2      | intron_variant       | c.1115+94306C>G  |             |          | driver    |
| chr7.g.120592408C>T | chr7 | 120592408 | C | T | + |     | KCND2      | intron_variant       | c.1116-140495C>T |             |          | driver    |
| chr7.g.121276952A>G | chr7 | 121276952 | A | G | + |     | CPED1      | intron_variant       | c.2868+5522A>G   |             |          | driver    |
| chr7.g.121972028C>A | chr7 | 121972028 | C | A | + |     | PTPRZ1     | intron_variant       | c.305-513C>A     |             |          | driver    |
| chr7.g.127727139G>A | chr7 | 127727139 | G | A | + |     | SND1       | intron_variant       | c.1152+5739G>A   |             | Oncogene | NA        |
| chr7.g.132355690C>T | chr7 | 132355690 | C | T | + |     | PLXNA4     | intron_variant       | c.1372-57468G>A  |             |          | driver    |
| chr7.g.146394260G>A | chr7 | 146394260 | G | A | + |     | CNTNAP2    | intron_variant       | c.97+277287G>A   |             | TSG      | driver    |
| chr7.g.146402440G>C | chr7 | 146402440 | G | C | + |     | CNTNAP2    | intron_variant       | c.97+285467G>C   |             | TSG      | driver    |
| chr7.g.147397052G>A | chr7 | 147397052 | G | A | + |     | CNTNAP2    | intron_variant       | c.1670+1272G>A   |             | TSG      | passenger |
| chr7.g.147459403G>T | chr7 | 147459403 | G | T | + |     | CNTNAP2    | intron_variant       | c.1671-26532G>T  |             | TSG      | driver    |
| chr7.g.147899791A>C | chr7 | 147899791 | A | C | + |     | CNTNAP2    | intron_variant       | c.2099-3774A>C   |             | TSG      | passenger |
| chr7.g.151238685G>A | chr7 | 151238685 | G | A | + |     | CHPF2      | 3_prime_UTR_variant  | c.*4G>A          |             |          | driver    |
| chr7.g.157170398T>A | chr7 | 157170398 | T | A | + | Yes | UBE3C      | stop_gained          | c.290T>A         | p.Leu97Ter  |          | driver    |
| chr8.g.1219074A>T   | chr8 | 1219074   | A | T | + |     | DLGAP2     | intron_variant       | c.74-39777A>T    |             |          | driver    |
| chr8.g.10692778G>A  | chr8 | 10692778  | G | A | + |     | C8orf74    | intron_variant       | c.242-4821G>A    |             |          | passenger |
| chr8.g.13704710G>T  | chr8 | 13704710  | G | T | + |     |            |                      |                  |             |          | driver    |
| chr8.g.28641389G>T  | chr8 | 28641389  | G | T | + |     | EXTL3      | intron_variant       | c.-53+18579G>T   |             |          | driver    |
| chr8.g.28938416C>T  | chr8 | 28938416  | C | T | + |     | HMBOX1     | intron_variant       | c.-57-25395C>T   |             |          | driver    |
| chr8.g.32274889G>T  | chr8 | 32274889  | G | T | + |     | NRG1       | intron_variant       | c.38-320939G>T   |             | TSG      | NA        |
| chr8.g.32399184C>G  | chr8 | 32399184  | C | G | + |     | NRG1       | intron_variant       | c.38-196644C>G   |             | TSG      | NA        |
| chr8.g.33808553G>A  | chr8 | 33808553  | G | A | + |     | AF27987.3  | lnc_RNA              |                  |             |          | driver    |
| chr8.g.38252938C>T  | chr8 | 38252938  | C | T | + |     | DDHD2      | intron_variant       | c.1721-19C>T     |             |          | driver    |
| chr8.g.39656200A>T  | chr8 | 39656200  | A | T | + |     | ADAM18     | intron_variant       | c.1231-7595A>T   |             |          | driver    |
| chr8.g.40386850G>A  | chr8 | 40386850  | G | A | + |     | AC105999.1 | lnc_RNA              |                  |             |          | passenger |
| chr8.g.49980167C>G  | chr8 | 49980167  | C | G | + |     | SNTG1      | intron_variant       | c.-103+67936C>G  |             |          | driver    |
| chr8.g.50047440G>A  | chr8 | 50047440  | G | A | + |     | SNTG1      | intron_variant       | c.-102-125121G>A |             |          | passenger |
| chr8.g.50118399T>G  | chr8 | 50118399  | T | G | + |     | SNTG1      | intron_variant       | c.-102-54162T>G  |             |          | passenger |
| chr8.g.55135544G>A  | chr8 | 55135544  | G | A | + |     | XKR4       | intron_variant       | c.806+32250G>A   |             |          | driver    |
| chr8.g.55512878G>A  | chr8 | 55512878  | G | A | + |     | XKR4       | intron_variant       | c.1007-10403G>A  |             |          | driver    |
| chr8.g.62890803G>A  | chr8 | 62890803  | G | A | + |     | NKAIN3     | intron_variant       | c.472-27650G>A   |             |          | driver    |
| chr8.g.66796513G>A  | chr8 | 66796513  | G | A | + |     | SGK3       | intron_variant       | c.97-2029G>A     |             |          | passenger |
| chr8.g.68026250G>A  | chr8 | 68026250  | G | A | + |     | PREX2      | intron_variant       | c.442-972G>A     |             | Oncogene | passenger |
| chr8.g.68331716T>C  | chr8 | 68331716  | T | C | + |     | C8orf34    | intron_variant       | c.327+377T>C     |             |          | driver    |
| chr8.g.68339273A>C  | chr8 | 68339273  | A | C | + |     | C8orf34    | intron_variant       | c.327+7934A>C    |             |          | passenger |
| chr8.g.68500226G>T  | chr8 | 68500226  | G | T | + |     | C8orf34    | intron_variant       | c.765+12175G>T   |             |          | driver    |
| chr8.g.69589176C>T  | chr8 | 69589176  | C | T | + |     | SULF1      | intron_variant       | c.734+35C>T      |             |          | driver    |

|                      |       |           |   |   |   |            |                      |                 |  |  |           |
|----------------------|-------|-----------|---|---|---|------------|----------------------|-----------------|--|--|-----------|
| chr8.g.70610436A>G   | chr8  | 70610436  | A | G | + | LACTB2-AS1 | lnc_RNA              |                 |  |  | passenger |
| chr8.g.76780312A>T   | chr8  | 76780312  | A | T | + | ZFH4       | intron_variant       | c.3325+1873A>T  |  |  | driver    |
| chr8.g.91255129T>C   | chr8  | 91255129  | T | C | + | SLC26A7    | intron_variant       | c.193+5285T>C   |  |  | passenger |
| chr8.g.94846060G>T   | chr8  | 94846060  | G | T | + | INTS8      | intron_variant       | c.1261-3402G>T  |  |  | driver    |
| chr8.g.10472600G>T   | chr8  | 10472600  | G | T | + | ZFPM2      | processed_transcript |                 |  |  | driver    |
| chr8.g.104809718A>C  | chr8  | 104809718 | A | C | + | ZFPM2      | processed_transcript |                 |  |  | driver    |
| chr8.g.105004657T>A  | chr8  | 105004657 | T | A | + | ZFPM2      | processed_transcript |                 |  |  | driver    |
| chr8.g.105475871G>T  | chr8  | 105475871 | G | T | + | ZFPM2      | intron_variant       | c.301+31490G>T  |  |  | driver    |
| chr8.g.111415309A>T  | chr8  | 111415309 | A | T | + | LINC02237  | lnc_RNA              |                 |  |  | driver    |
| chr8.g.117137481C>G  | chr8  | 117137481 | C | G | + | SLC30A8    | intron_variant       | c.71+2083C>G    |  |  | driver    |
| chr8.g.124871585G>A  | chr8  | 124871585 | G | A | + | LINC00964  | lnc_RNA              |                 |  |  | driver    |
| chr8.g.136087370T>C  | chr8  | 136087370 | T | C | + | LINC02055  | lnc_RNA              |                 |  |  | passenger |
| chr8.g.136415183T>G  | chr8  | 136415183 | T | G | + | LINC02055  | lnc_RNA              |                 |  |  | driver    |
| chr8.g.136989295G>A  | chr8  | 136989295 | G | A | + | LINC02055  | lnc_RNA              |                 |  |  | driver    |
| chr8.g.137045061T>G  | chr8  | 137045061 | T | G | + | LINC02055  | lnc_RNA              |                 |  |  | passenger |
| chr8.g.14116455C>T   | chr8  | 14116455  | C | T | + | DENND3     | intron_variant       | c.1450-631C>T   |  |  | driver    |
| chr8.g.144210767T>G  | chr8  | 144210767 | T | G | + | MROH1      | intron_variant       | c.1142-9833T>G  |  |  | passenger |
| chr8.g.144219642G>T  | chr8  | 144219642 | G | T | + | MROH1      | intron_variant       | c.1142-958G>T   |  |  | driver    |
| chr9.g.11785284C>G   | chr9  | 11785284  | C | G | + | AL353595.1 | lnc_RNA              |                 |  |  | driver    |
| chr9.g.18152549G>T   | chr9  | 18152549  | G | T | + |            |                      |                 |  |  | driver    |
| chr9.g.18503491C>T   | chr9  | 18503491  | C | T | + | ADAMTSL1   | intron_variant       | c.64-1338C>T    |  |  | passenger |
| chr9.g.21936369T>C   | chr9  | 21936369  | T | C | + | MTAP       | 3_prime_UTR_variant  | c.*5170T>C      |  |  | passenger |
| chr9.g.72745159C>G   | chr9  | 72745159  | C | G | + | TMC1       | intron_variant       | c.535+2634C>G   |  |  | driver    |
| chr9.g.74623025A>G   | chr9  | 74623025  | A | G | + | RORB       | intron_variant       | c.8-7257A>G     |  |  | passenger |
| chr9.g.75983637A>T   | chr9  | 75983637  | A | T | + | PCSK5      | intron_variant       | c.298-2495A>T   |  |  | driver    |
| chr9.g.76547409A>C   | chr9  | 76547409  | A | C | + | GCNT1      | processed_transcript |                 |  |  | driver    |
| chr9.g.79631598C>G   | chr9  | 79631598  | C | G | + | TLE4       | intron_variant       | c.390+4150C>G   |  |  | driver    |
| chr9.g.81748680C>T   | chr9  | 81748680  | C | T | + | AL591368.1 | lnc_RNA              |                 |  |  | passenger |
| chr9.g.82399061A>C   | chr9  | 82399061  | A | C | + |            |                      |                 |  |  | driver    |
| chr9.g.92109831G>A   | chr9  | 92109831  | G | A | + | SPTLC1     | intron_variant       | c.166-997C>T    |  |  | passenger |
| chr9.g.101475074T>A  | chr9  | 101475074 | T | A | + | PGAP4      | 3_prime_UTR_variant  | c.*807A>T       |  |  | driver    |
| chr9.g.11014958A>G   | chr9  | 11014958  | A | G | + | PALM2AKAP2 | intron_variant       | c.2996-6731A>G  |  |  | passenger |
| chr9.g.117707111T>A  | chr9  | 117707111 | T | A | + | TLR4       | intron_variant       | c.94-1452T>A    |  |  | driver    |
| chr10.g.1000042C>T   | chr10 | 1000042   | C | T | + | GTPBP4     | intron_variant       | c.655-635C>T    |  |  | driver    |
| chr10.g.3919585A>T   | chr10 | 3919585   | A | T | + | LINC02660  | lnc_RNA              |                 |  |  | driver    |
| chr10.g.6201498C>T   | chr10 | 6201498   | C | T | + | PFKFB3     | 2kb_upstream_variant | c.-1763C>T      |  |  | driver    |
| chr10.g.11079872C>G  | chr10 | 11079872  | C | G | + | CELF2      | intron_variant       | c.74+61709C>G   |  |  | driver    |
| chr10.g.18397432T>A  | chr10 | 18397432  | T | A | + | CACNB2     | intron_variant       | c.214-4492T>A   |  |  | driver    |
| chr10.g.24436887G>A  | chr10 | 24436887  | G | A | + | KIAA1217   | intron_variant       | c.753-1499G>A   |  |  | driver    |
| chr10.g.25482389G>A  | chr10 | 25482389  | G | A | + | GPR158     | intron_variant       | c.1404+15670G>A |  |  | driver    |
| chr10.g.32878477T>C  | chr10 | 32878477  | T | C | + | CCDC7      | processed_transcript |                 |  |  | driver    |
| chr10.g.35459032G>A  | chr10 | 35459032  | G | A | + | CCNY       | intron_variant       | c.155-24372G>A  |  |  | driver    |
| chr10.g.48705322G>A  | chr10 | 48705322  | G | A | + | WDFY4      | intron_variant       | c.-17-4394G>A   |  |  | driver    |
| chr10.g.51548650T>A  | chr10 | 51548650  | T | A | + | PRKG1      | intron_variant       | c.592+80814T>A  |  |  | driver    |
| chr10.g.52013842C>A  | chr10 | 52013842  | C | A | + | PRKG1      | intron_variant       | c.763-40642C>A  |  |  | driver    |
| chr10.g.52277477A>C  | chr10 | 52277477  | A | C | + | PRKG1      | intron_variant       | c.1404-3312A>C  |  |  | driver    |
| chr10.g.63710333C>T  | chr10 | 63710333  | C | T | + | ACO13287.1 | lnc_RNA              |                 |  |  | driver    |
| chr10.g.68115512T>C  | chr10 | 68115512  | T | C | + | MYPN       | intron_variant       | c.-2+5789T>C    |  |  | driver    |
| chr10.g.68133519G>T  | chr10 | 68133519  | G | T | + | MYPN       | intron_variant       | c.903-9421G>T   |  |  | driver    |
| chr10.g.71054646C>A  | chr10 | 71054646  | C | A | + | ACO73176.2 | lnc_RNA              |                 |  |  | driver    |
| chr10.g.71302177C>T  | chr10 | 71302177  | C | T | + | UNC5B      | 3_prime_UTR_variant  | c.*2900C>T      |  |  | passenger |
| chr10.g.76509385A>G  | chr10 | 76509385  | A | G | + | LRMDA      | intron_variant       | c.602-47824A>G  |  |  | passenger |
| chr10.g.79110453G>A  | chr10 | 79110453  | G | A | + | ZMIZ1      | intron_variant       | c.336-8462G>A   |  |  | driver    |
| chr10.g.80581459A>C  | chr10 | 80581459  | A | C | + | SH2D4B     | intron_variant       | c.496-7171A>C   |  |  | driver    |
| chr10.g.104764169C>A | chr10 | 104764169 | C | A | + | SORCS3     | intron_variant       | c.628-78623C>A  |  |  | driver    |
| chr10.g.110876844G>T | chr10 | 110876844 | G | T | + | PDCD4      | intron_variant       | c.43+774G>T     |  |  | driver    |
| chr10.g.115939846C>A | chr10 | 115939846 | C | A | + | ATRNL1     | intron_variant       | c.4019-4812C>A  |  |  | driver    |
| chr10.g.130227141C>A | chr10 | 130227141 | C | A | + | LINC02646  | lnc_RNA              |                 |  |  | driver    |
| chr10.g.130302916G>T | chr10 | 130302916 | G | T | + | LINC02646  | lnc_RNA              |                 |  |  | passenger |
| chr10.g.130443893C>G | chr10 | 130443893 | C | G | + | LINC02646  | lnc_RNA              |                 |  |  | driver    |
| chr11.g.609983G>A    | chr11 | 609983    | G | A | + | PHRF1      | intron_variant       | c.4265-213G>A   |  |  | passenger |
| chr11.g.3974408G>T   | chr11 | 3974408   | G | T | + | STIM1      | intron_variant       | c.270+6726G>T   |  |  | driver    |
| chr11.g.4823143G>T   | chr11 | 4823143   | G | T | + | MMP26      | intron_variant       | c.-145+55802G>T |  |  | driver    |
| chr11.g.7253123C>T   | chr11 | 7253123   | C | T | + | SYT9       | intron_variant       | c.145+792C>T    |  |  | driver    |
| chr11.g.7290111G>A   | chr11 | 7290111   | G | A | + | SYT9       | intron_variant       | c.146-12928G>A  |  |  | driver    |
| chr11.g.7985546G>C   | chr11 | 7985546   | G | C | + | EIF3F      | 2kb_upstream_variant | c.-1807G>C      |  |  | driver    |
| chr11.g.12762381G>T  | chr11 | 12762381  | G | T | + | TEAD1      | intron_variant       | c.-54-1798G>T   |  |  | passenger |
| chr11.g.21358003C>G  | chr11 | 21358003  | C | G | + | NELL1      | intron_variant       | c.1550-12850C>G |  |  | driver    |
| chr11.g.21955521A>T  | chr11 | 21955521  | A | T | + | ANO5       | processed_transcript |                 |  |  | driver    |
| chr11.g.21975909C>T  | chr11 | 21975909  | C | T | + | ANO5       | processed_transcript |                 |  |  | driver    |
| chr11.g.27535728C>A  | chr11 | 27535728  | C | A | + | BDNF-AS    | lnc_RNA              |                 |  |  | driver    |
| chr11.g.28210687A>T  | chr11 | 28210687  | A | T | + | METTL15    | intron_variant       | c.271-375A>T    |  |  | driver    |
| chr11.g.30596321A>C  | chr11 | 30596321  | A | C | + | MPPED2-AS1 | lnc_RNA              |                 |  |  | driver    |
| chr11.g.36393809C>A  | chr11 | 36393809  | C | A | + | PRR5L      | intron_variant       | c.-125-7188C>A  |  |  | driver    |
| chr11.g.43449759C>G  | chr11 | 43449759  | C | G | + | TTC17      | intron_variant       | c.2787-323C>G   |  |  | passenger |
| chr11.g.44903620G>T  | chr11 | 44903620  | G | T | + | TSPAN18    | intron_variant       | c.-10-2787G>T   |  |  | driver    |
| chr11.g.57782705A>G  | chr11 | 57782705  | A | G | + | CTNND1     | intron_variant       | c.-213-6332A>G  |  |  | driver    |



|                      |       |           |   |   |   |     |            |                        |                  |           |          |           |
|----------------------|-------|-----------|---|---|---|-----|------------|------------------------|------------------|-----------|----------|-----------|
| chr11.g.90358347A>T  | chr11 | 90358347  | A | T | + |     | DISC1FP1   | lnc_RNA                |                  |           |          | driver    |
| chr11.g.92827494A>G  | chr11 | 92827494  | A | G | + |     | FAT3       | intron_variant         | c.9482-4128A>G   |           |          | passenger |
| chr11.g.92865428C>T  | chr11 | 92865428  | C | T | + |     | FAT3       | intron_variant         | c.11659-1313C>T  |           |          | driver    |
| chr11.g.100149607>A  | chr11 | 100149607 | T | A | + |     | CNTN5      | intron_variant         | c.1581-41519T>A  |           |          | passenger |
| chr11.g.102783769C>T | chr11 | 102783769 | C | T | + |     |            |                        |                  |           |          | driver    |
| chr11.g.105817906T>C | chr11 | 105817906 | T | C | + |     | GRIA4      | intron_variant         | c.488-44118T>C   |           |          | passenger |
| chr11.g.106254497A>G | chr11 | 106254497 | A | G | + |     | AP002001.3 | lnc_RNA                |                  |           |          | driver    |
| chr11.g.112576520C>T | chr11 | 112576520 | C | T | + |     | LINC02763  | lnc_RNA                |                  |           |          | passenger |
| chr11.g.112995525T>C | chr11 | 112995525 | T | C | + |     | NCAM1      | intron_variant         | c.49-8321T>C     |           |          | driver    |
| chr11.g.120237700G>T | chr11 | 120237700 | G | T | + |     | POU2F3     | intron_variant         | c.34+993G>T      |           |          | driver    |
| chr11.g.123902842C>A | chr11 | 123902842 | C | A | + |     | OR8D4      | intron_variant         | c.-16+585C>A     |           |          | driver    |
| chr11.g.124803495T>G | chr11 | 124803495 | T | G | + |     | AP000866.1 | lnc_RNA                |                  |           |          | driver    |
| chr11.g.128810910G>A | chr11 | 128810910 | G | A | + | Yes | FLI1       | synonymous_variant     | c.1281G>A        | p.Thr427= | Oncogene | NA        |
| chr12.g.5016481G>T   | chr12 | 5016481   | G | T | + |     | AC005906.2 | lnc_RNA                |                  |           |          | driver    |
| chr12.g.11220171G>C  | chr12 | 11220171  | G | C | + |     | AC244131.2 | lnc_RNA                |                  |           |          | driver    |
| chr12.g.11579153T>C  | chr12 | 11579153  | T | C | + |     | LINC01252  | lnc_RNA                |                  |           |          | driver    |
| chr12.g.12133183A>G  | chr12 | 12133183  | A | G | + |     | LRP6       | intron_variant         | c.3734-1126T>C   |           |          | driver    |
| chr12.g.12141429T>C  | chr12 | 12141429  | T | C | + |     | LRP6       | intron_variant         | c.3398-2895A>G   |           |          | passenger |
| chr12.g.12910491C>T  | chr12 | 12910491  | C | T | + |     | GPRC5A     | intron_variant         | c.922+1320C>T    |           |          | driver    |
| chr12.g.16368985A>G  | chr12 | 16368985  | A | G | + |     | MGST1      | intron_variant         | c.222-7137A>G    |           |          | passenger |
| chr12.g.16694332G>T  | chr12 | 16694332  | G | T | + |     | AC007529.2 | lnc_RNA                |                  |           |          | driver    |
| chr12.g.18267544C>A  | chr12 | 18267544  | C | A | + |     | PIK3C2G    | intron_variant         | c.-79+5967C>A    |           |          | driver    |
| chr12.g.82826385G>T  | chr12 | 82826385  | G | T | + |     | TMTC2      | intron_variant         | c.84-30625G>T    |           |          | driver    |
| chr12.g.83055905C>A  | chr12 | 83055905  | C | A | + |     | TMTC2      | intron_variant         | c.2267+4887C>A   |           |          | driver    |
| chr12.g.85235966G>T  | chr12 | 85235966  | G | T | + |     | LRRIQ1     | intron_variant         | c.5016+3210G>T   |           |          | driver    |
| chr12.g.93004089G>A  | chr12 | 93004089  | G | A | + |     | LINC02413  | lnc_RNA                |                  |           |          | driver    |
| chr12.g.93686018G>C  | chr12 | 93686018  | G | C | + |     | CRADD      | intron_variant         | c.298+6946G>C    |           |          | passenger |
| chr12.g.93709958T>A  | chr12 | 93709958  | T | A | + |     | CRADD      | intron_variant         | c.298+30886T>A   |           |          | driver    |
| chr12.g.101970395C>G | chr12 | 101970395 | C | G | + |     |            |                        |                  |           |          | driver    |
| chr12.g.106413827C>G | chr12 | 106413827 | C | G | + |     | POLR3B     | intron_variant         | c.1101+2867C>G   |           |          | driver    |
| chr12.g.112921186G>A | chr12 | 112921186 | G | A | + |     | OAS1       | 2kb_downstream_variant | c.*1633G>A       |           |          | driver    |
| chr12.g.114096415G>T | chr12 | 114096415 | G | T | + |     | AC010183.2 | lnc_RNA                |                  |           |          | driver    |
| chr12.g.125300923T>A | chr12 | 125300923 | T | A | + |     | TMEM132B   | processed_transcript   |                  |           |          | driver    |
| chr12.g.125315703A>T | chr12 | 125315703 | A | T | + |     | TMEM132B   | processed_transcript   |                  |           |          | driver    |
| chr12.g.126141556A>G | chr12 | 126141556 | A | G | + |     | LINC02359  | lnc_RNA                |                  |           |          | driver    |
| chr12.g.133174148C>T | chr12 | 133174148 | C | T | + |     | AC026786.1 | intron_variant         | c.444-7798C>T    |           |          | passenger |
| chr13.g.42207936C>G  | chr13 | 42207936  | C | G | + |     | DGKH       | intron_variant         | c.2602-1023C>G   |           |          | driver    |
| chr13.g.45252592C>G  | chr13 | 45252592  | C | G | + |     | GTF2F2     | intron_variant         | c.387-279C>G     |           |          | driver    |
| chr13.g.53358493T>G  | chr13 | 53358493  | T | G | + |     | AL450423.1 | lnc_RNA                |                  |           |          | driver    |
| chr13.g.74255601A>T  | chr13 | 74255601  | A | T | + |     | LINC00402  | lnc_RNA                |                  |           |          | driver    |
| chr13.g.92288921C>T  | chr13 | 92288921  | C | T | + |     | GPC5       | intron_variant         | c.1561+143932C>T |           | TSG      | driver    |
| chr13.g.93362767T>C  | chr13 | 93362767  | T | C | + |     | GPC6       | intron_variant         | c.160+135151T>C  |           |          | driver    |
| chr13.g.93795431G>T  | chr13 | 93795431  | G | T | + |     | GPC6       | intron_variant         | c.320-34723G>T   |           |          | driver    |
| chr13.g.93960653C>G  | chr13 | 93960653  | C | G | + |     | GPC6       | intron_variant         | c.712-67076C>G   |           |          | driver    |
| chr13.g.96713374C>T  | chr13 | 96713374  | C | T | + |     | HS6ST3     | intron_variant         | c.708-119116C>T  |           |          | driver    |
| chr13.g.101019011C>A | chr13 | 101019011 | C | A | + |     | NALCN-AS1  | lnc_RNA                |                  |           |          | driver    |
| chr13.g.105752123C>T | chr13 | 105752123 | C | T | + |     | LINC00343  | lnc_RNA                |                  |           |          | driver    |
| chr13.g.109180698T>G | chr13 | 109180698 | T | G | + |     | MYO16      | intron_variant         | c.5415+1065T>G   |           |          | driver    |
| chr14.g.22557134C>T  | chr14 | 22557134  | C | T | + |     | AC243965.1 | lnc_RNA                |                  |           |          | driver    |
| chr14.g.32690286C>T  | chr14 | 32690286  | C | T | + |     | AKAP6      | intron_variant         | c.2880-5704C>T   |           |          | driver    |
| chr14.g.35886282A>G  | chr14 | 35886282  | A | G | + |     |            |                        |                  |           |          | driver    |
| chr14.g.52818180T>C  | chr14 | 52818180  | T | C | + |     | AL139317.1 | lnc_RNA                |                  |           |          | passenger |
| chr14.g.53696637T>C  | chr14 | 53696637  | T | C | + |     | LINC02331  | lnc_RNA                |                  |           |          | driver    |
| chr14.g.53795831C>T  | chr14 | 53795831  | C | T | + |     | LINC02331  | lnc_RNA                |                  |           |          | driver    |
| chr14.g.54470799C>A  | chr14 | 54470799  | C | A | + |     | AL359792.1 | lnc_RNA                |                  |           |          | driver    |
| chr14.g.57070176G>A  | chr14 | 57070176  | G | A | + |     | AL391152.1 | lnc_RNA                |                  |           |          | driver    |
| chr14.g.58790112A>T  | chr14 | 58790112  | A | T | + |     | LINC01500  | lnc_RNA                |                  |           |          | driver    |
| chr14.g.67895229C>T  | chr14 | 67895229  | C | T | + |     | RAD51B     | intron_variant         | c.756+8025C>T    |           | TSG      | NA        |
| chr14.g.68690970A>C  | chr14 | 68690970  | A | C | + |     | RAD51B     | intron_variant         | c.*12-38838A>C   |           | TSG      | NA        |
| chr14.g.74100232T>G  | chr14 | 74100232  | T | G | + |     | LIN52      | intron_variant         | c.212-923T>G     |           |          | driver    |
| chr14.g.76154177A>G  | chr14 | 76154177  | A | G | + |     | GPATCH2L   | intron_variant         | c.-10-177A>G     |           |          | driver    |
| chr14.g.78690756A>T  | chr14 | 78690756  | A | T | + |     | NRXN3      | intron_variant         | c.1216-18461A>T  |           |          | driver    |
| chr14.g.78743489G>T  | chr14 | 78743489  | G | T | + |     | NRXN3      | intron_variant         | c.2038+2835G>T   |           |          | driver    |
| chr14.g.78847139A>G  | chr14 | 78847139  | A | G | + |     | NRXN3      | intron_variant         | c.2242+43316A>G  |           |          | driver    |
| chr14.g.79288729G>C  | chr14 | 79288729  | G | C | + |     | NRXN3      | intron_variant         | c.3230-178492G>C |           |          | driver    |
| chr14.g.79343061A>T  | chr14 | 79343061  | A | T | + |     | NRXN3      | intron_variant         | c.3230-124160A>T |           |          | driver    |
| chr14.g.79434432C>A  | chr14 | 79434432  | C | A | + |     | NRXN3      | intron_variant         | c.3230-32789C>A  |           |          | driver    |
| chr14.g.79528812G>T  | chr14 | 79528812  | G | T | + |     | NRXN3      | intron_variant         | c.3411+61410G>T  |           |          | driver    |
| chr14.g.86351943T>C  | chr14 | 86351943  | T | C | + |     | LINC02309  | lnc_RNA                |                  |           |          | passenger |
| chr14.g.88178632C>T  | chr14 | 88178632  | C | T | + |     | KCNK10     | 2kb_downstream_variant | c.*6903G>A       |           |          | passenger |
| chr14.g.97196646A>G  | chr14 | 97196646  | A | G | + |     | AL188800.1 | lnc_RNA                |                  |           |          | passenger |
| chr15.g.25995747G>T  | chr15 | 25995747  | G | T | + |     | LINC02346  | lnc_RNA                |                  |           |          | driver    |
| chr15.g.35686572T>C  | chr15 | 35686572  | T | C | + |     | DPH6-DT    | lnc_RNA                |                  |           |          | driver    |
| chr15.g.42681995G>C  | chr15 | 42681995  | G | C | + |     | STAR9      | intron_variant         | c.2066-109G>C    |           |          | driver    |
| chr15.g.45774592T>A  | chr15 | 45774592  | T | A | + |     | AC068722.1 | lnc_RNA                |                  |           |          | driver    |
| chr15.g.54141448T>G  | chr15 | 54141448  | T | G | + |     | UNC13C     | intron_variant         | c.2984-1570T>G   |           |          | passenger |
| chr15.g.64896421G>A  | chr15 | 64896421  | G | A | + |     |            |                        |                  |           |          | driver    |
| chr15.g.66645408G>T  | chr15 | 66645408  | G | T | + |     | LINC01169  | lnc_RNA                |                  |           |          | driver    |

|                     |       |          |   |   |   |     |             |                        |                  |             |           |
|---------------------|-------|----------|---|---|---|-----|-------------|------------------------|------------------|-------------|-----------|
| chr15.g.67369679G>A | chr15 | 67369679 | G | A | + |     | IQCH        | intron_variant         | c.754-2432G>A    |             | driver    |
| chr15.g.71541568C>G | chr15 | 71541568 | C | G | + |     | THSD4       | intron_variant         | c.1153-118962C>G |             | driver    |
| chr15.g.81354334A>T | chr15 | 81354334 | A | T | + |     | TMC3        | intron_variant         | c.935+1391T>A    |             | driver    |
| chr15.g.86518380C>G | chr15 | 86518380 | C | G | + |     | AGBL1       | intron_variant         | c.2556-4430C>G   |             | driver    |
| chr15.g.89387442G>T | chr15 | 89387442 | G | T | + |     | MIR9-3HG    | lnc_RNA                |                  |             | driver    |
| chr15.g.98766893A>C | chr15 | 98766893 | A | C | + |     | IGF1R       | intron_variant         | c.640+58786A>C   |             | driver    |
| chr16.g.5359310C>T  | chr16 | 5359310  | C | T | + |     | RBFOX1      | intron_variant         | c.220-107906C>T  |             | driver    |
| chr16.g.5379185A>G  | chr16 | 5379185  | A | G | + |     | RBFOX1      | intron_variant         | c.220-88031A>G   |             | passenger |
| chr16.g.6567808G>T  | chr16 | 6567808  | G | T | + |     | RBFOX1      | intron_variant         | c.63-86995G>T    |             | driver    |
| chr16.g.6764128T>C  | chr16 | 6764128  | T | C | + |     | RBFOX1      | intron_variant         | c.-16+109478T>C  |             | passenger |
| chr16.g.9472022A>G  | chr16 | 9472022  | A | G | + |     | AC012178.1  | lnc_RNA                |                  |             | passenger |
| chr16.g.9614789C>T  | chr16 | 9614789  | C | T | + |     | AC007221.1  | lnc_RNA                |                  |             | passenger |
| chr16.g.16046339T>C | chr16 | 16046339 | T | C | + |     | ABCC1       | intron_variant         | c.1218+326T>C    |             | passenger |
| chr16.g.31180128G>A | chr16 | 31180128 | G | A | + |     | FUS         | 5_prime_UTR_variant    | c.-87G>A         | TSG         | NA        |
| chr16.g.48586686C>A | chr16 | 48586686 | C | A | + |     | N4BP1       | intron_variant         | c.198+23089G>T   |             | driver    |
| chr16.g.51629907T>C | chr16 | 51629907 | T | C | + |     | HNRNPA1P4.8 | intron_variant         | c.-622-15424T>C  |             | driver    |
| chr16.g.58197553G>A | chr16 | 58197553 | G | A | + |     | CSNK2A2     | intron_variant         | c.104+80C>T      |             | driver    |
| chr16.g.64500805T>C | chr16 | 64500805 | T | C | + |     | AC092131.1  | lnc_RNA                |                  |             | driver    |
| chr16.g.65395762G>T | chr16 | 65395762 | G | T | + |     | AC009055.1  | lnc_RNA                |                  |             | driver    |
| chr16.g.68856744T>G | chr16 | 68856744 | T | G | + |     | TANGO6      | intron_variant         | c.95-3140T>G     |             | driver    |
| chr16.g.68910195A>G | chr16 | 68910195 | A | G | + |     | TANGO6      | intron_variant         | c.1992+793A>G    |             | driver    |
| chr16.g.76798398T>G | chr16 | 76798398 | T | G | + |     | AC106729.1  | lnc_RNA                |                  |             | passenger |
| chr16.g.82855986T>C | chr16 | 82855986 | T | C | + |     | CDH13       | intron_variant         | c.46-2376T>C     |             | driver    |
| chr16.g.83258659C>G | chr16 | 83258659 | C | G | + |     | CDH13       | intron_variant         | c.636+41162C>G   |             | driver    |
| chr16.g.85428641G>T | chr16 | 85428641 | G | T | + |     |             |                        |                  |             | passenger |
| chr16.g.89686836C>T | chr16 | 89686836 | C | T | + |     | CDK10       | intron_variant         | c.87+39C>T       |             | driver    |
| chr17.g.11335618G>T | chr17 | 11335618 | G | T | + |     | SHISA6      | intron_variant         | c.800-43796G>T   |             | driver    |
| chr17.g.11377509G>A | chr17 | 11377509 | G | A | + |     | SHISA6      | intron_variant         | c.800-1905G>A    |             | driver    |
| chr17.g.11719748C>G | chr17 | 11719748 | C | G | + |     | DNAH9       | intron_variant         | c.5709+258C>G    |             | driver    |
| chr17.g.17752827C>A | chr17 | 17752827 | C | A | + |     | RAI1        | intron_variant         | c.-17+28668C>A   |             | driver    |
| chr17.g.17789733G>A | chr17 | 17789733 | G | A | + |     | RAI1        | intron_variant         | c.-16-3200G>A    |             | driver    |
| chr17.g.31476832C>T | chr17 | 31476832 | C | T | + |     | RAB11FIP4   | intron_variant         | c.337-40819C>T   |             | driver    |
| chr17.g.59808050A>G | chr17 | 59808050 | A | G | + |     | VMP1        | intron_variant         | c.715-746A>G     |             | driver    |
| chr17.g.68626044T>C | chr17 | 68626044 | T | C | + |     | LINC01482   | lnc_RNA                |                  |             | passenger |
| chr17.g.70173268T>G | chr17 | 70173268 | T | G | + |     | KCNJ2       | intron_variant         | c.-216-1556T>G   |             | driver    |
| chr17.g.75105256G>A | chr17 | 75105256 | G | A | + |     | SLC16A5     | intron_variant         | c.1365-624G>A    |             | driver    |
| chr17.g.75521466G>A | chr17 | 75521466 | G | A | + | Yes | TSEN54      | synonymous_variant     | c.579G>A         | p.Leu193=   | passenger |
| chr18.g.1683453C>T  | chr18 | 1683453  | C | T | + |     | AC019183.1  | lnc_RNA                |                  |             | driver    |
| chr18.g.7784671A>C  | chr18 | 7784671  | A | C | + |     | PTPRM       | intron_variant         | c.196+10400A>C   |             | driver    |
| chr18.g.9813977G>T  | chr18 | 9813977  | G | T | + |     | RAB31       | intron_variant         | c.202-43G>T      |             | driver    |
| chr18.g.28724378G>T | chr18 | 28724378 | G | T | + |     | AC090365.1  | lnc_RNA                |                  |             | passenger |
| chr18.g.44878670G>A | chr18 | 44878670 | G | A | + |     | SETBP1      | intron_variant         | c.540+9387G>A    | Oncogene    | NA        |
| chr18.g.45403970G>A | chr18 | 45403970 | G | A | + |     | SLC14A2     | intron_variant         | c.-124-79263G>A  |             | driver    |
| chr18.g.50891442T>G | chr18 | 50891442 | T | G | + |     | ME2         | intron_variant         | c.-12-4367T>G    |             | driver    |
| chr18.g.53314878G>T | chr18 | 53314878 | G | T | + |     | DCC         | intron_variant         | c.2054-7169G>T   |             | driver    |
| chr18.g.5577288T>C  | chr18 | 5577288  | T | C | + |     | AC022031.2  | lnc_RNA                |                  |             | passenger |
| chr18.g.59063290G>A | chr18 | 59063290 | G | A | + |     |             |                        |                  |             | driver    |
| chr18.g.63674039C>G | chr18 | 63674039 | C | G | + |     |             |                        |                  |             | driver    |
| chr18.g.63921453T>A | chr18 | 63921453 | T | A | + |     | SERPINB10   | intron_variant         | c.490+1548T>A    |             | driver    |
| chr18.g.67690426A>T | chr18 | 67690426 | A | T | + |     | AC114689.3  | lnc_RNA                |                  |             | driver    |
| chr19.g.1194473G>T  | chr19 | 1194473  | G | T | + |     |             |                        |                  |             | passenger |
| chr19.g.5111065G>T  | chr19 | 5111065  | G | T | + |     | KDM4B       | intron_variant         | c.1115+247G>T    |             | driver    |
| chr19.g.6813315G>C  | chr19 | 6813315  | G | C | + |     | VAV1        | intron_variant         | c.205-7387G>C    | fusion      | driver    |
| chr19.g.29672573C>G | chr19 | 29672573 | C | G | + |     | PLEKHF1     | intron_variant         | c.-16-1251C>G    |             | driver    |
| chr19.g.30302031G>T | chr19 | 30302031 | G | T | + |     | ZNF536      | processed_transcript   |                  |             | driver    |
| chr19.g.30858645C>A | chr19 | 30858645 | C | A | + |     | AC011507.1  | lnc_RNA                |                  |             | driver    |
| chr19.g.37018963T>A | chr19 | 37018963 | T | A | + |     |             |                        |                  |             | driver    |
| chr19.g.38040133G>C | chr19 | 38040133 | G | C | + |     | SIPA1L3     | intron_variant         | c.-311+10977G>C  |             | driver    |
| chr19.g.39446117A>G | chr19 | 39446117 | A | G | + |     | SUP15H      | intron_variant         | c.75+152A>G      |             | driver    |
| chr19.g.41258349G>A | chr19 | 41258349 | G | A | + |     | AXL         | intron_variant         | c.2333+720G>A    |             | driver    |
| chr19.g.48756848T>A | chr19 | 48756848 | T | A | + |     | FGF21       | intron_variant         | c.236-78T>A      |             | passenger |
| chr19.g.49007141G>A | chr19 | 49007141 | G | A | + | Yes | RUVBL2      | missense_variant       | c.389G>A         | p.Arg130His | 0.27859   |
| chr19.g.54453223A>C | chr19 | 54453223 | A | C | + |     | LENG8       | intron_variant         | c.316-323A>C     |             | passenger |
| chr19.g.56739228A>G | chr19 | 56739228 | A | G | + |     | AC006115.2  | lnc_RNA                |                  |             | driver    |
| chr19.g.57495456G>A | chr19 | 57495456 | G | A | + |     | ZNF419      | 2kb_downstream_variant | c.*1366G>A       |             | passenger |
| chr19.g.58253805T>A | chr19 | 58253805 | T | A | + |     | ZNF544      | intron_variant         | c.244+7011T>A    |             | driver    |
| chr20.g.2153870A>G  | chr20 | 2153870  | A | G | + |     |             |                        |                  |             | driver    |
| chr20.g.2557033A>T  | chr20 | 2557033  | A | T | + |     | TMC2        | intron_variant         | c.83-1423A>T     |             | driver    |
| chr20.g.10942406T>A | chr20 | 10942406 | T | A | + |     | AL050403.2  | lnc_RNA                |                  |             | driver    |
| chr20.g.15633298G>T | chr20 | 15633298 | G | T | + |     | MACROD2     | intron_variant         | c.645+133451G>T  |             | driver    |
| chr20.g.21172515C>G | chr20 | 21172515 | C | G | + |     | KIZ         | intron_variant         | c.1352+9356C>G   |             | driver    |
| chr20.g.37723808T>G | chr20 | 37723808 | T | G | + |     | CTNBL1      | intron_variant         | c.31-9071T>G     |             | driver    |
| chr20.g.37909558C>A | chr20 | 37909558 | C | A | + |     | VSTM2L      | intron_variant         | c.121+6087C>A    |             | driver    |
| chr20.g.45809636C>T | chr20 | 45809636 | C | T | + |     | DNTP1P1     | intron_variant         | c.795+451C>T     |             | driver    |
| chr20.g.49289302A>G | chr20 | 49289302 | A | G | + |     | ZFAS1       | lnc_RNA                |                  |             | passenger |
| chr20.g.53111989T>G | chr20 | 53111989 | T | G | + |     | TSHZ2       | intron_variant         | c.40+138656T>G   |             | passenger |
| chr20.g.53345485G>A | chr20 | 53345485 | G | A | + |     | TSHZ2       | intron_variant         | c.*8+88914G>A    |             | driver    |
| chr20.g.58593206C>A | chr20 | 58593206 | C | A | + |     | APCDD1L-DT  | lnc_RNA                |                  |             | driver    |
| chr20.g.59745604G>A | chr20 | 59745604 | G | A | + |     | PHACTR3     | intron_variant         | c.281-2154G>A    |             | passenger |
| chr21.g.14216250C>A | chr21 | 14216250 | C | A | + | Yes | RBM11       | synonymous_variant     | c.64C>A          | p.Arg22=    | passenger |
| chr21.g.22337827G>T | chr21 | 22337827 | G | T | + |     | AP000561.1  | lnc_RNA                |                  |             | driver    |
| chr21.g.34747490T>G | chr21 | 34747490 | T | G | + |     | LINC01428   | lnc_RNA                |                  |             | passenger |
| chr22.g.39472916G>T | chr22 | 39472916 | G | T | + |     | MGAT3       | intron_variant         | c.-1-14431G>T    |             | driver    |

|                     |       |          |   |   |   |  |        |                |                |  |  |           |
|---------------------|-------|----------|---|---|---|--|--------|----------------|----------------|--|--|-----------|
| chr22:g.42786007C>T | chr22 | 42786007 | C | T | + |  |        |                |                |  |  | passenger |
| chr22:g.50713847C>G | chr22 | 50713847 | C | G | + |  | SHANK3 | intron_variant | c.2114-1070C>G |  |  | driver    |

**Table S8.** Annotation of putative somatic SNVs from the TNBC sample measured in single-cell DNA profile.

## Supplementary Note 1: Monopogen implementation

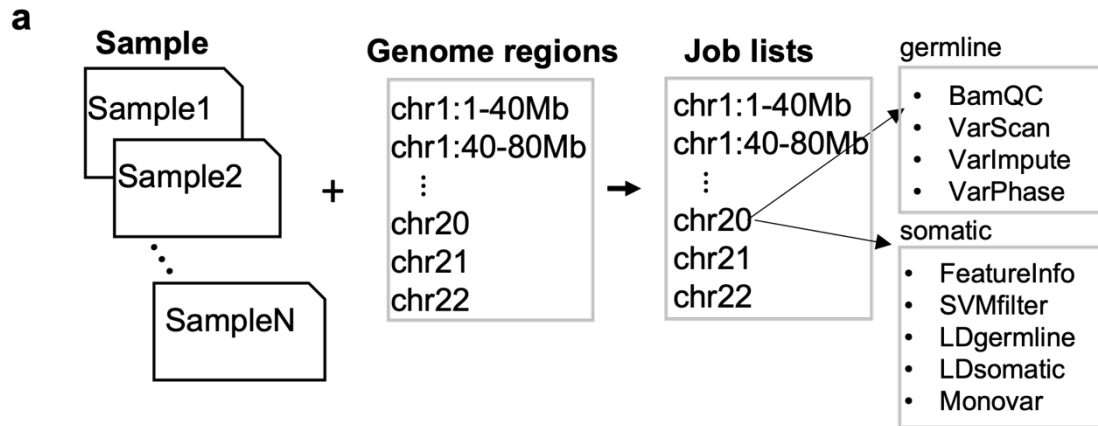

**b**

| SNV caller | version  | No. of CPUs | Wall clock time | Peak memory |
|------------|----------|-------------|-----------------|-------------|
| Monopogen  | V1.0     | 8           | 24 mins         | 49.6GB      |
| Samtools   | V1.2     | 1           | 43 mins         | 103Mb       |
| GATK       | V4.2.6.1 | 8           | 180 mins        | 68.4GB      |
| FreeBayes  | V1.3.6   | 1           | 10 mins         | 84Mb        |
| Strelka2   | V2.9.10  | 8           | 8 mins          | 664Mb       |
| scAllele   | V0.0.9.3 | 8           | 36 mins         | 24.4GB      |
| cellSNP    | V0.3.2   | 8           | 128 mins        | 4.4GB       |

**Implementations of Monopogen on SNV calling in single cell sequencing data. a,** Monopogen adopts the framework implemented in GotCloud for Trans-Omics for Precision Medicine Program (TOPMed), by splitting the genome into small chunks (defined by the users), performing variant scan and LD refinement in massive parallelization for individual chunks and merging the results. **b,** Wall clock time and memory usage for 7 SNV callers on germline SNV calling. We evaluated computational usages using single cell DNA sequencing reads from chr20 of TNBC sample (TN28). Samtools and FreeBayes do not support multi-threading feature. For other tools, the peak

memory includes memory usage from all CPUs. The tests were performed on a high-performance computing cluster with Intel Xeon CPUs (2.30 GHz).
